# Supplementary material for: 6-Amino-4-Aryl-7-Phenyl-3-(Phenylimino)-4,7-Dihydro-3H-[1,2]dithiolo[3,4-B]pyridine-5-Carboxamides: Synthesis, Biological Activity, Quantum Chemical Studies and In Silico Docking Studies
Source: Preprints.org preprint supplement (doi:10.20944/preprints202312.0487.v1), 2023-12-07
Supplement: Supplementary file 1 [file supplementary]

# 6-Amino-4-aryl-7-phenyl-3-(phenylimino)-4,7-dihydro-3H-[1,2]dithiolo[3,4-b]pyridine-5-carboxamides: synthesis, biological activity, quantum chemical studies and *in silico* docking studies

Victor V. Dotsenko <sup>1,2,\*</sup>, Alexander V. Bespalov <sup>1,\*</sup>, Anna E. Sinotsko <sup>1</sup>, Azamat Z. Temerdashev <sup>3</sup>, Vladimir K. Vasilin <sup>4</sup>, Ekaterina A. Varzieva <sup>1</sup>, Vladimir D. Strelkov <sup>1</sup>, Nicolai A. Aksenov <sup>2</sup> and Inna V. Aksenova <sup>2</sup>

<sup>1</sup>Department Organic Chemistry and Technologies, Kuban State University, 149 Stavropolskaya St., 350040 Krasnodar, Russia;

<sup>2</sup>Department of Chemistry, North Caucasus Federal University, 1a Pushkin St., 355017 Stavropol, Russia;

<sup>3</sup>Department of Analytical Chemistry, Kuban State University, 149 Stavropolskaya St., 350040 Krasnodar, Russia;

<sup>4</sup>Department of Bioorganic Chemistry, Kuban State Technological University, 2 Moskovskaya St., 350072, Krasnodar, Russia.

\*Correspondence: victor\_dotsenko\_@mail.ru (V.V.D.), bespalov-alex@mail.ru (A.V.B.).

## Contents

|                                                                                                                                                                                                                                 |    |
|---------------------------------------------------------------------------------------------------------------------------------------------------------------------------------------------------------------------------------|----|
| Figure S1. <sup>1</sup> H NMR spectrum of compound 3a, DMSO-d <sub>6</sub> (400 MHz) .....                                                                                                                                      | 3  |
| Figure S2. <sup>13</sup> C NMR spectrum of .....                                                                                                                                                                                | 3  |
| Figure S3. FTIR spectrum of compound 3a .....                                                                                                                                                                                   | 4  |
| Figure S4. HSQC 2D <sup>1</sup> H- <sup>13</sup> C NMR spectrum of compound 3a, DMSO-d <sub>6</sub> (400/101 MHz) .....                                                                                                         | 4  |
| Figure S5. HMBC 2D <sup>1</sup> H- <sup>13</sup> C NMR spectrum of compound 3a, DMSO-d <sub>6</sub> (400/101 MHz) .....                                                                                                         | 5  |
| Table S1. The observed correlations in the <sup>1</sup> H- <sup>13</sup> C HSQC and <sup>1</sup> H- <sup>13</sup> C HMBC 2D NMR spectra of compound 3a .....                                                                    | 6  |
| Figure S6. <sup>1</sup> H NMR spectrum of compound 3c, DMSO-d <sub>6</sub> (400 MHz) .....                                                                                                                                      | 7  |
| Figure S7. <sup>13</sup> C NMR spectrum of compound 3c, DMSO-d <sub>6</sub> (101 MHz) .....                                                                                                                                     | 7  |
| Figure S8. <sup>1</sup> H- <sup>13</sup> C HSQC NMR spectrum of compound 3c, DMSO-d <sub>6</sub> (400/101 MHz) .....                                                                                                            | 8  |
| Table S2. The observed correlations in the <sup>1</sup> H- <sup>13</sup> C HSQC 2D NMR spectrum of compound 3c .....                                                                                                            | 9  |
| Figure S9. FTIR spectrum of compound 3c .....                                                                                                                                                                                   | 10 |
| Figure S10. <sup>1</sup> H NMR spectrum of compound 3d (solvate with EtOH), DMSO-d <sub>6</sub> (400 MHz) .....                                                                                                                 | 10 |
| Figure S11. <sup>13</sup> C NMR spectrum of compound 3d (solvate with EtOH), DMSO-d <sub>6</sub> (101 MHz) .....                                                                                                                | 11 |
| Figure S13. <sup>1</sup> H- <sup>13</sup> C HSQC NMR spectrum of compound 3d (solvate with EtOH), DMSO-d <sub>6</sub> (100/400 MHz) .....                                                                                       | 12 |
| Figure S14. <sup>1</sup> H- <sup>13</sup> C HMBC NMR spectrum of compound 3d (solvate with EtOH), DMSO-d <sub>6</sub> (100/400 MHz) .....                                                                                       | 13 |
| Table S3. The observed correlations in the <sup>1</sup> H- <sup>13</sup> C HSQC and <sup>1</sup> H- <sup>13</sup> C HMBC 2D NMR spectra of compound 3d (solvate with EtOH), DMSO-d <sub>6</sub> (100/400 MHz) .....             | 14 |
| Figure S15. FTIR spectrum of compound 3d .....                                                                                                                                                                                  | 15 |
| Figure S16. ORTEP drawings of the crystal structure showing 50% probability thermal ellipsoids (CCDC 2310349) and microphotography of the single crystal of compound 3d used for X-Ray diffraction analysis at the bottom ..... | 16 |
| Table S4. Crystal data and structure refinement for 6-amino-4-(2,4-dichlorophenyl)-7-phenyl-3-(phenylimino)-4,7-dihydro-3H-[1,2]dithiolo[3,4-b]pyridine-5-carboxamide 3d ..                                                     | 17 |

|                                                                                                                                                                                                                                                |    |
|------------------------------------------------------------------------------------------------------------------------------------------------------------------------------------------------------------------------------------------------|----|
| Table S5. Fractional Atomic Coordinates ( $\times 10^4$ ) and Equivalent Isotropic Displacement Parameters ( $\text{\AA}^2 \times 10^3$ ) for compound 3d. $U_{eq}$ is defined as 1/3 of the trace of the orthogonalised $U_{ij}$ tensor. .... | 18 |
| Table S6. Anisotropic Displacement Parameters ( $\text{\AA}^2 \times 10^3$ ) for 3d. The Anisotropic displacement factor exponent takes the form: $-2\pi^2[h^2a^{*2}U_{11}+...+2hka^*b^*U_{12}+ ...]$ .....                                    | 19 |
| Table S7. Bond Lengths for compound 3d. ....                                                                                                                                                                                                   | 20 |
| Table S8. Bond Angles for compound 3d. ....                                                                                                                                                                                                    | 21 |
| Table S9. Torsion Angles for compound 3d .....                                                                                                                                                                                                 | 22 |
| Table S10. Hydrogen Atom Coordinates ( $\text{\AA} \times 10^4$ ) and Isotropic Displacement Parameters ( $\text{\AA}^2 \times 10^3$ ) for compound 3d.....                                                                                    | 23 |
| Table S11. Solvent masks information for compound 3d.....                                                                                                                                                                                      | 24 |
| Crystal structure determination details for compound 3d .....                                                                                                                                                                                  | 24 |
| Figure S17. HRMS data for compound 3a .....                                                                                                                                                                                                    | 25 |
| Figure S18. HRMS data for compound 3b .....                                                                                                                                                                                                    | 25 |
| Figure S19. HRMS data for compound 3c .....                                                                                                                                                                                                    | 26 |
| Figure S20. HRMS data for compound 3d.....                                                                                                                                                                                                     | 26 |
| Figure S21. HRMS data for the crude mixture from the experiment (3) - reaction of 3-(4-methoxyphenyl)-2-cyanoacrylamide 2f with dithiomalonanilide 1 taken in the ratio 2 : 1;27                                                               |    |
| Figure S22. HRMS of pure dithiolopyridine 3f (experiment (2), Table 1, entry 6). ....                                                                                                                                                          | 27 |
| Table S12. Toxicity risks and physicochemical parameters of compounds 3a-f predicted using OSIRIS Property Explorer .....                                                                                                                      | 28 |
| Table S13. ADMET parameters calculated for compound 3a using SwissADME and AdmetSar.....                                                                                                                                                       | 30 |
| Table S14. ADMET parameters calculated for compound 3b using SwissADME and AdmetSar.....                                                                                                                                                       | 34 |
| Table S15. ADMET parameters calculated for compound 3c using SwissADME and AdmetSar.....                                                                                                                                                       | 38 |
| Table S16. ADMET parameters calculated for compound 3d using SwissADME and AdmetSar.....                                                                                                                                                       | 41 |
| Table S17. ADMET parameters calculated for compound 3e using SwissADME and AdmetSar.....                                                                                                                                                       | 44 |
| Table S18. ADMET parameters calculated for compound 3f using SwissADME and AdmetSar.....                                                                                                                                                       | 47 |
| Table S19. Rat acute toxicity of 3a predicted by GUSAR .....                                                                                                                                                                                   | 51 |
| Table S20. Rat acute toxicity of 3b predicted by GUSAR .....                                                                                                                                                                                   | 52 |
| Table S21. Rat acute toxicity of 3c predicted by GUSAR .....                                                                                                                                                                                   | 53 |
| Table S22. Rat acute toxicity of 3d predicted by GUSAR.....                                                                                                                                                                                    | 54 |
| Table S23. Rat acute toxicity of 3e predicted by GUSAR .....                                                                                                                                                                                   | 55 |
| Table S24. Rat acute toxicity of 3f predicted by GUSAR.....                                                                                                                                                                                    | 56 |
| Table S25. The predicted results of protein-ligand interaction for compounds 3a-f.....                                                                                                                                                         | 57 |

Figure S1.  $^1\text{H}$  NMR spectrum of compound 3a, DMSO- $d_6$  (400 MHz)

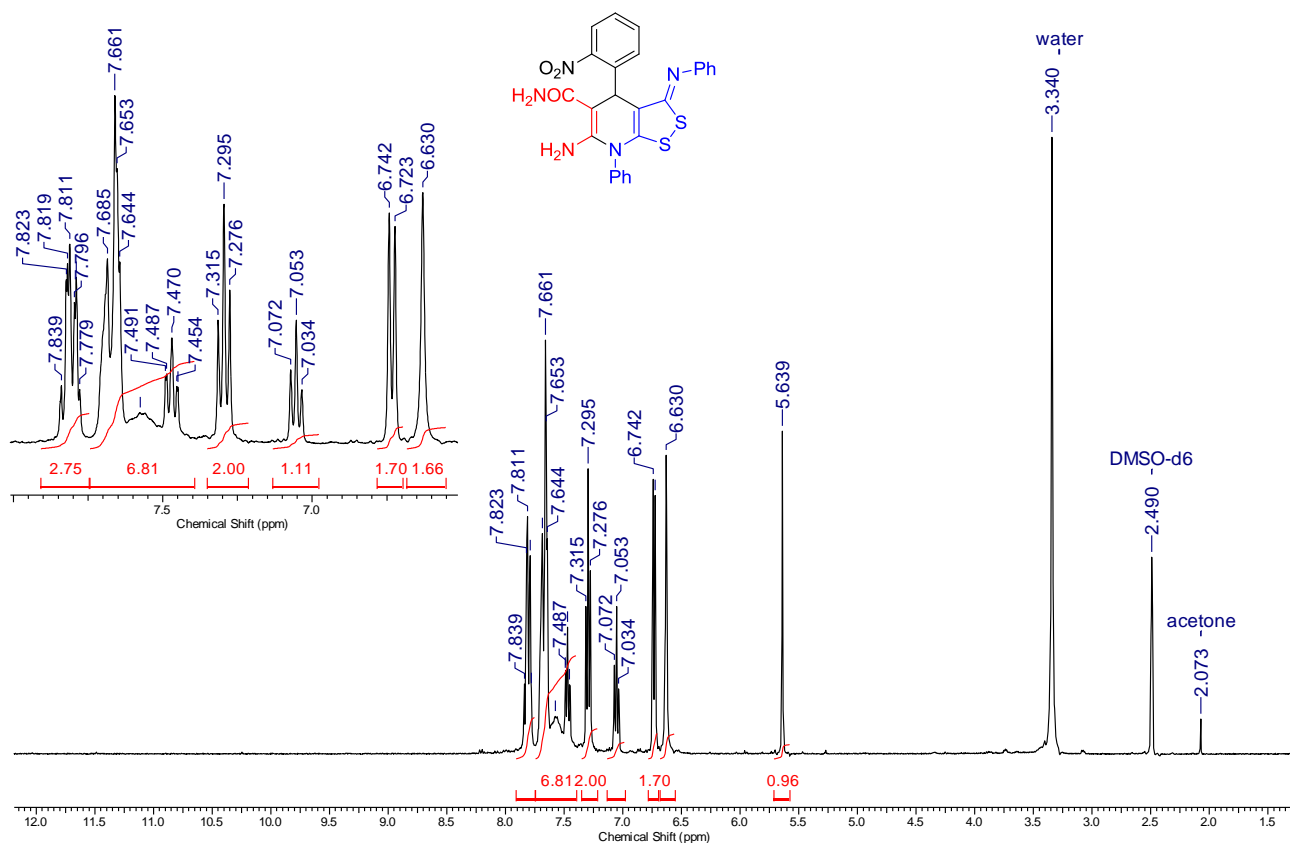

Figure S2.  $^{13}\text{C}$  NMR spectrum of compound 3a, DMSO- $d_6$  (101 MHz)

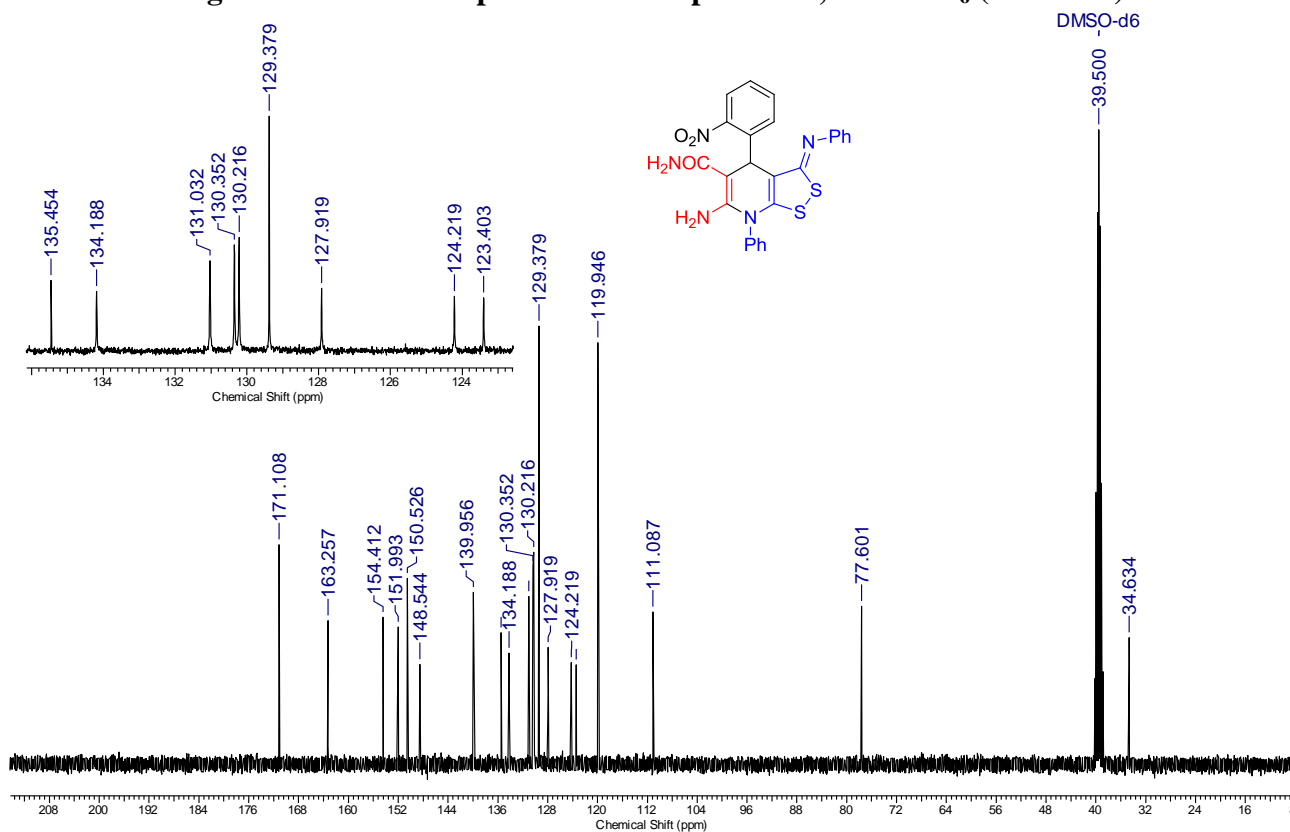

Figure S3. FTIR spectrum of compound 3a

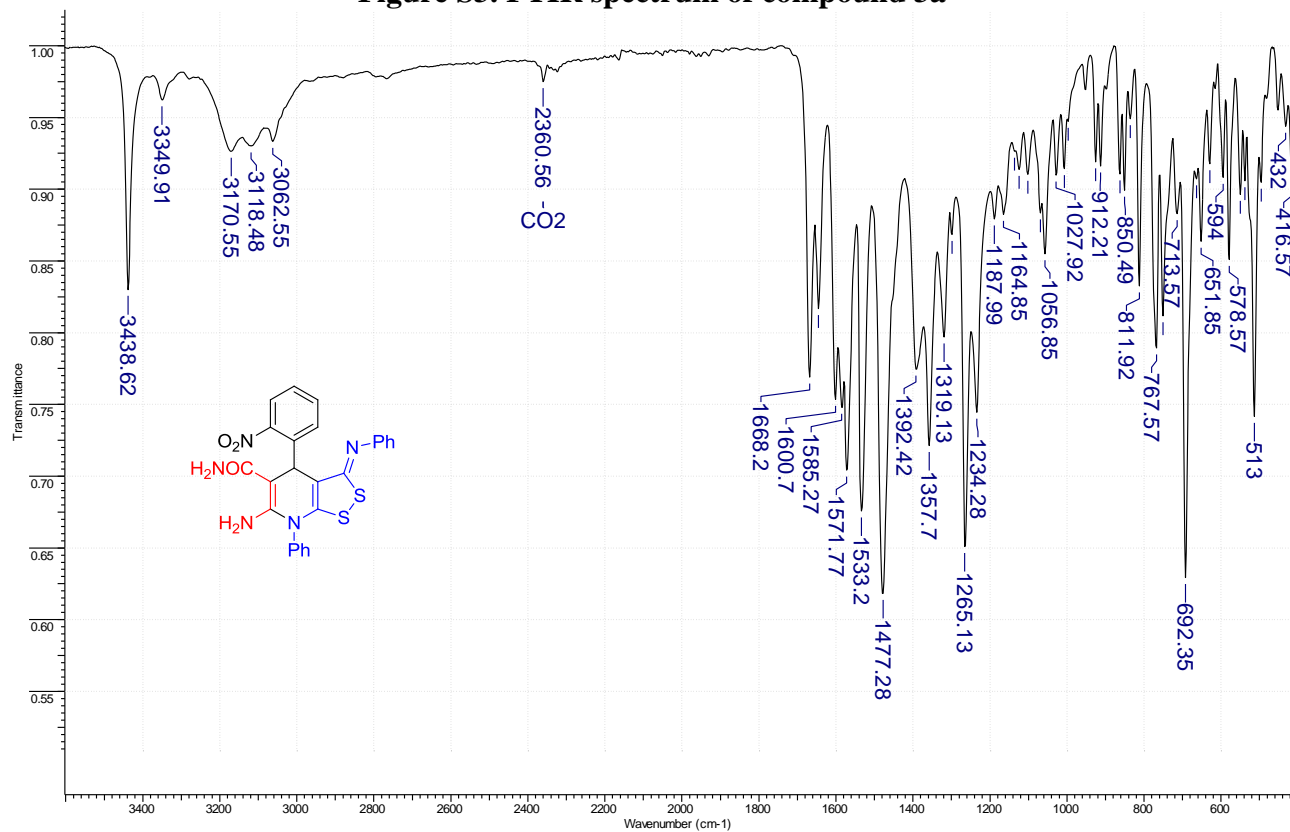

Figure S4. HSQC 2D <sup>1</sup>H-<sup>13</sup>C NMR spectrum of compound 3a, DMSO-d<sub>6</sub> (400/101 MHz)

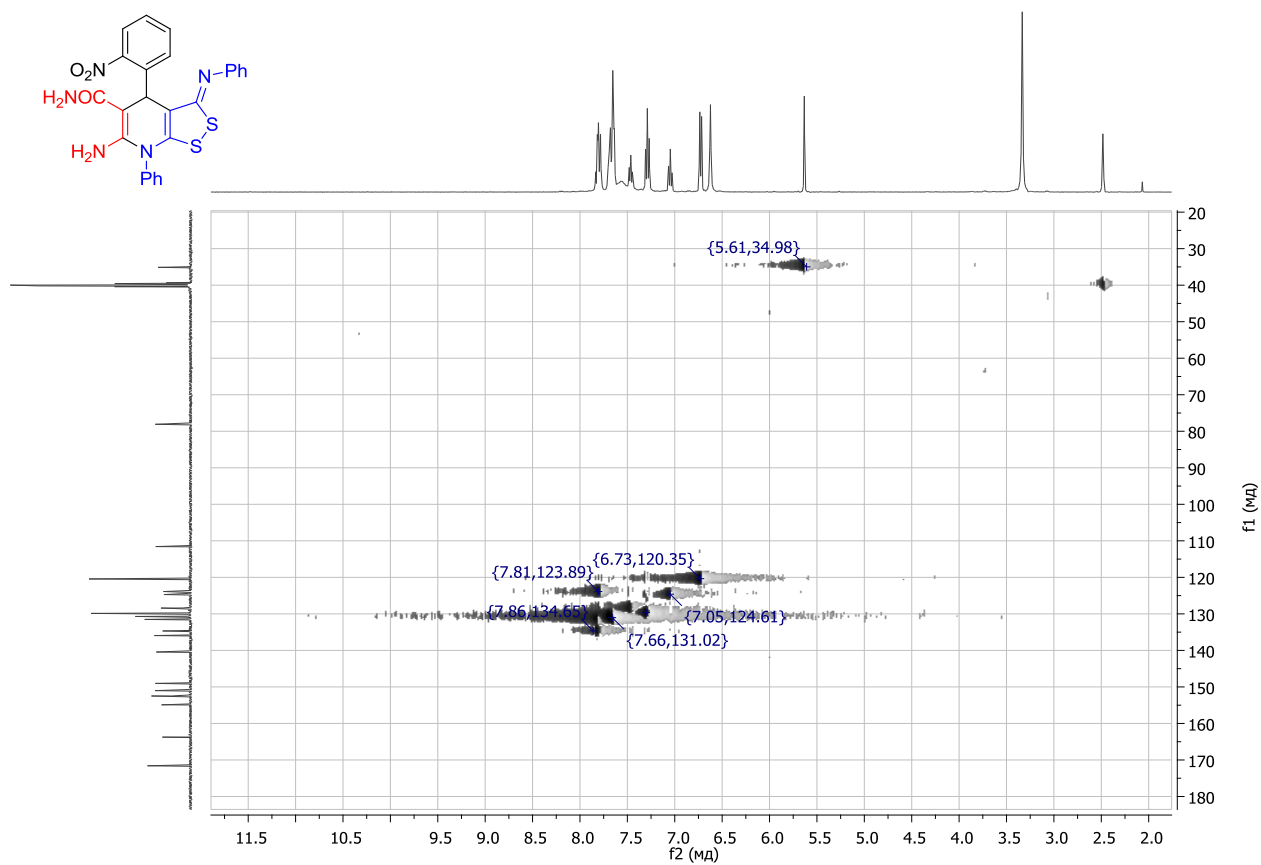

Figure S5. HMBC 2D  $^1\text{H}$ - $^{13}\text{C}$  NMR spectrum of compound 3a, DMSO- $d_6$  (400/101 MHz)

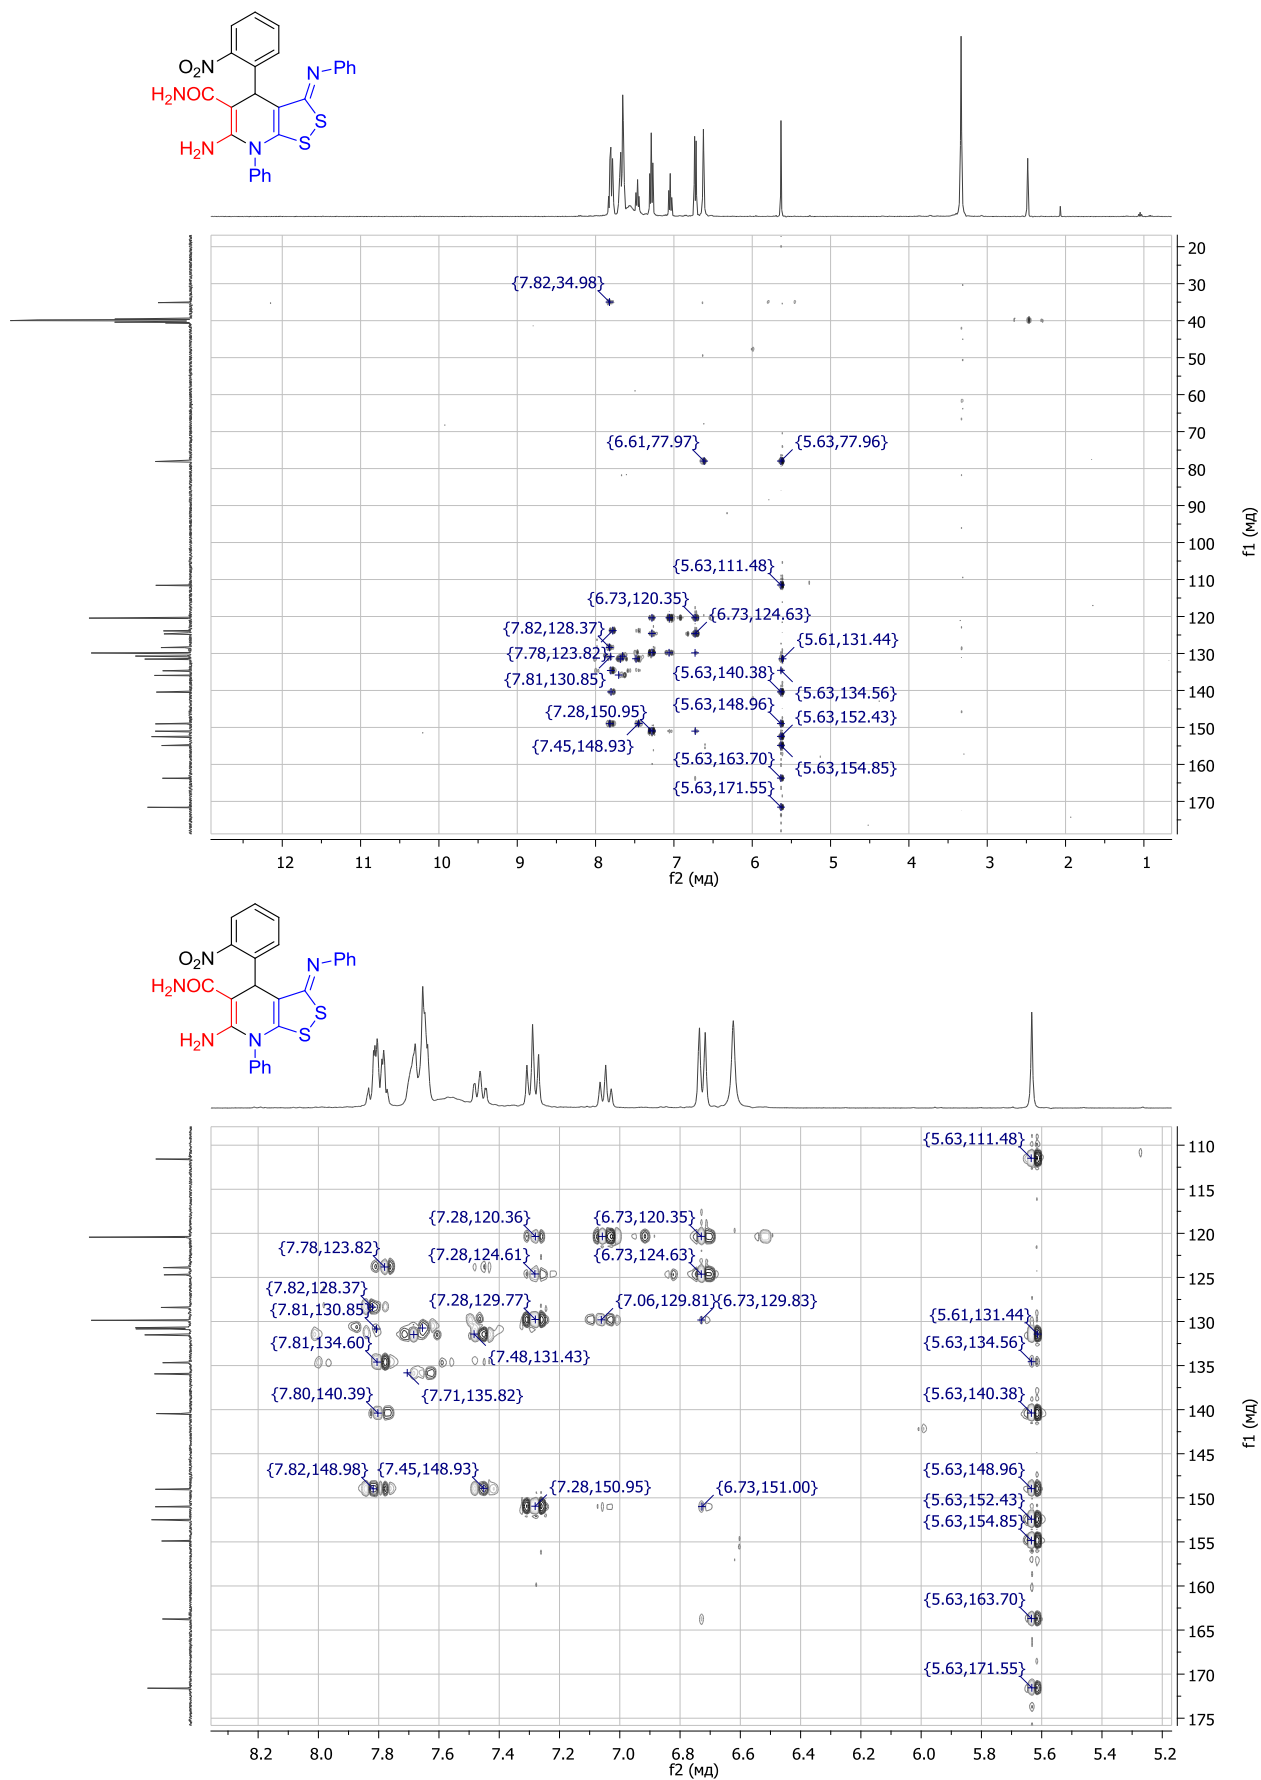

**Table S1. The observed correlations in the  $^1\text{H}$ - $^{13}\text{C}$  HSQC and  $^1\text{H}$ - $^{13}\text{C}$  HMBC 2D NMR spectra of compound 3a**

$^{13}\text{C}$  chemical shifts are given in **red**,  $^1\text{H}$  shifts – in **blue**

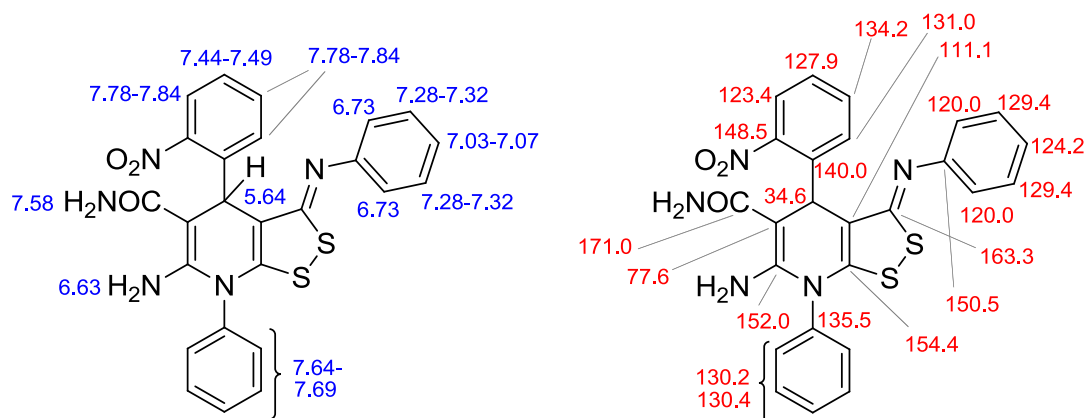

| $^1\text{H}$ NMR shifts, $\delta$ , ppm  | Correlations in HSQC spectrum, $\delta$ , ppm | Correlations in HMBC spectrum, $\delta$ , ppm                                                                                                                                 |
|------------------------------------------|-----------------------------------------------|-------------------------------------------------------------------------------------------------------------------------------------------------------------------------------|
| 5.64 (s, 1H, H-4)                        | 34.6 (C-4)                                    | 77.6 (C-5), 111.1 (C-3a), 131.0 (C-6 Ar), 134.2 weak (C-5 Ar), 140.0 (C-1 Ar), 148.5 (C-NO <sub>2</sub> ), 152.0 (C-6), 154.4 (C-7a), 163.3 (C-3), 171.1 (CONH <sub>2</sub> ) |
| 6.63 (br s, 2H, NH <sub>2</sub> )        | –                                             | 77.6 (C-5)                                                                                                                                                                    |
| 6.73 (d, $^3J = 7.5$ Hz, 2H, H-2 H-6 Ph) | 120.0 (2C, C-2 C-6 Ph)                        | 120.0 (2C, C-2 C-6 Ph), 124.2 (C-4 Ph), 129.4 weak (2C, C-3 C-5 Ph), 150.5 (C-1 Ph)                                                                                           |
| 7.03-7.07 (m, 1H, H-4 Ph)                | 124.2 (C-4 Ph)                                | 120.0 (2C, C-2 C-6 Ph), 129.4 (2C, C-3 C-5 Ph)                                                                                                                                |
| 7.28-7.32 (m, 2H, H-3 H-5 Ph)            | 129.4 (2C, C-3 C-5 Ph)                        | 120.0 (2C, C-2 C-6 Ph), 124.2 (C-4 Ph), 129.4 (2C, C-3 C-5 Ph), 150.5 (C-1 Ph)                                                                                                |
| 7.44-7.49 (m, 1H, Ar)                    | 127.9 (C-4 Ar),                               | 123.4 weak (C-3 Ar), 131.0 (C-6 Ar), 134.2 weak (C-5 Ar), 148.5 (C-NO <sub>2</sub> )                                                                                          |
| 7.58 (br s, CONH <sub>2</sub> )          | –                                             | –                                                                                                                                                                             |
| 7.64-7.69 (m, 5H, Ph)                    | 130.2 (CH Ph), 130.4 (CH Ph)                  | 130.2 (CH Ph), 130.4 (CH Ph), 135.5 (C-1 Ph)                                                                                                                                  |
| 7.78-7.83 (m, 3H, Ar)                    | 123.4 (C-3 Ar), 134.2 (C-5 Ar),               | 34.6 (C-4), 123.4 (C-3 Ar), 127.9 (C-4 Ar), 131.0 (C-6 Ar), 134.2 (C-5 Ar), 140.0 (C-1 Ar), 148.5 (C-NO <sub>2</sub> )                                                        |

$^1\text{H}$  NMR (400 MHz, DMSO- $d_6$ ): 5.64 (s, 1H, H-4), 6.63 (br s, 2H, NH<sub>2</sub>), 6.73 (d,  $^3J = 7.5$  Hz, 2H, H-2 H-6 Ph), 7.03-7.07 (m, 1H, H-4 Ph), 7.28-7.32 (m, 2H, H-3 H-5 Ph), 7.44-7.49 (m, 1H, H-4 Ar), 7.58 (br s, CONH<sub>2</sub>), 7.64-7.69 (m, 5H, Ph), 7.78-7.83 (m, 3H, Ar).

$^{13}\text{C}$  NMR (101 MHz, DMSO- $d_6$ ): 34.6 (C-4), 77.6 (C-5), 111.1 (C-3a), 120.0 (2C, C-2 C-6 Ph), 123.4 (C-3 Ar), 124.2 (C-4 Ph), 127.9 (C-4 Ar), 129.4 (2C, C-3 C-5 Ph), 130.2 (CH Ph), 130.4 (CH Ph), 131.0 (C-6 Ar), 134.2 (C-5 Ar), 135.5 (C-1 Ph), 140.0 (C-1 Ar), 148.5 (C-NO<sub>2</sub>), 150.5 (C-1 Ph), 152.0 (C-6), 154.4 (C-7a), 163.3 (C-3), 171.1 (CONH<sub>2</sub>).

Figure S6.  $^1\text{H}$  NMR spectrum of compound 3c, DMSO- $d_6$  (400 MHz)

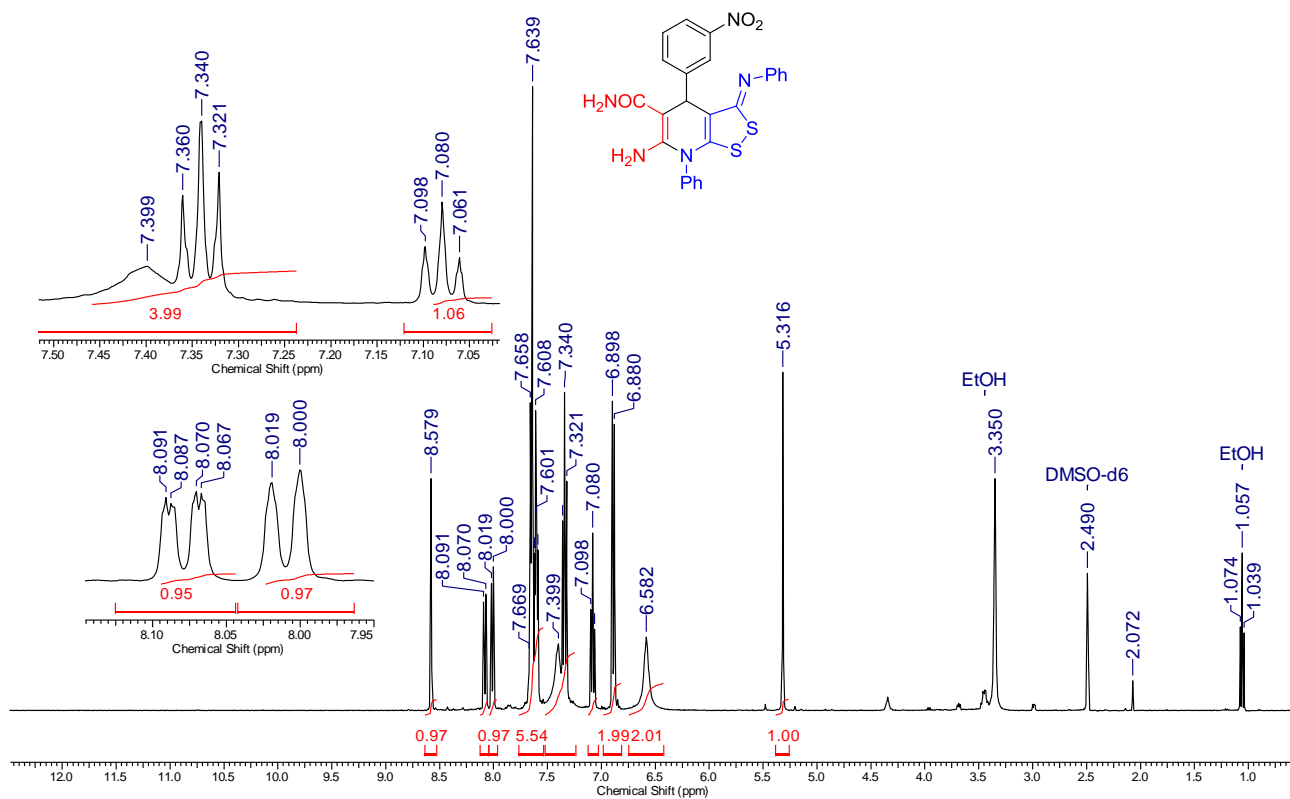

Figure S7.  $^{13}\text{C}$  NMR spectrum of compound 3c, DMSO- $d_6$  (101 MHz)

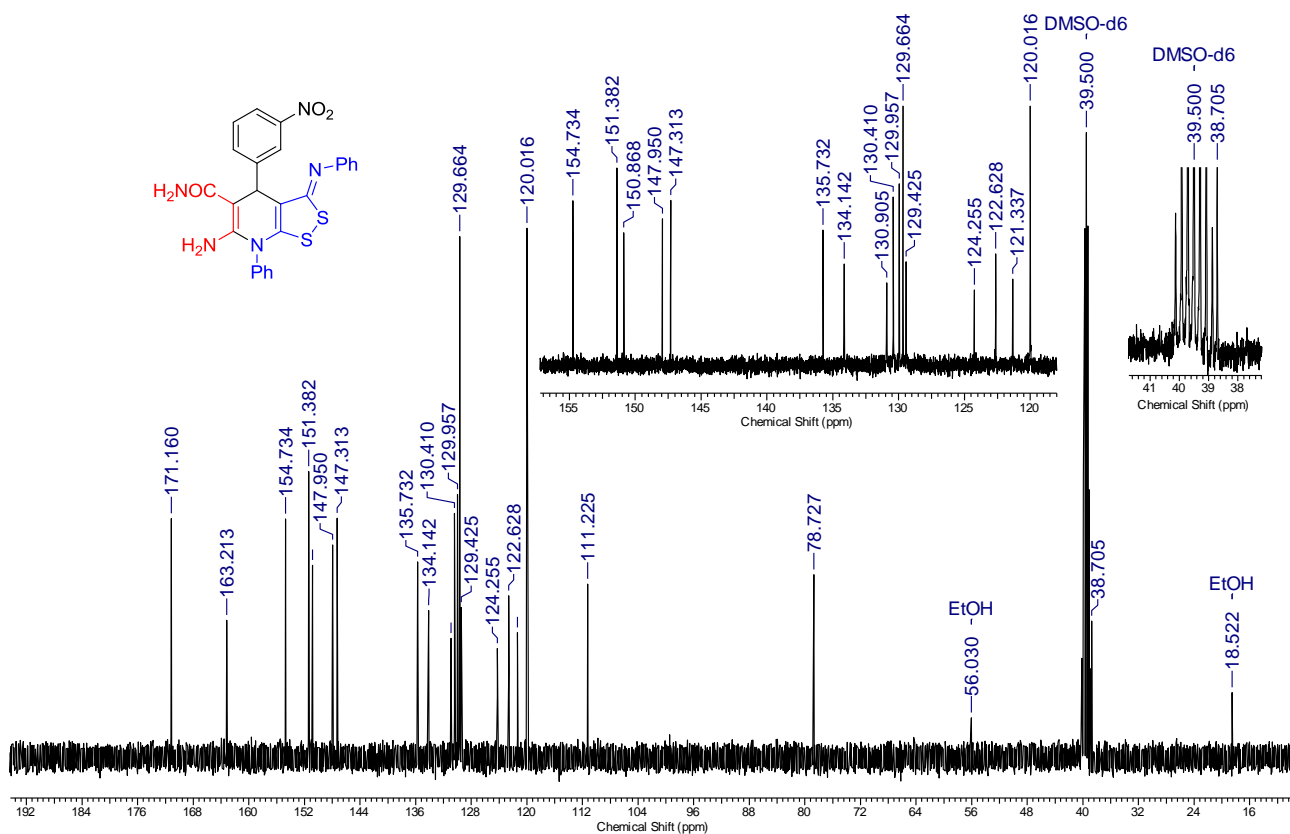

Figure S8.  $^1\text{H}$ - $^{13}\text{C}$  HSQC NMR spectrum of compound 3c, DMSO- $d_6$  (400/101 MHz)

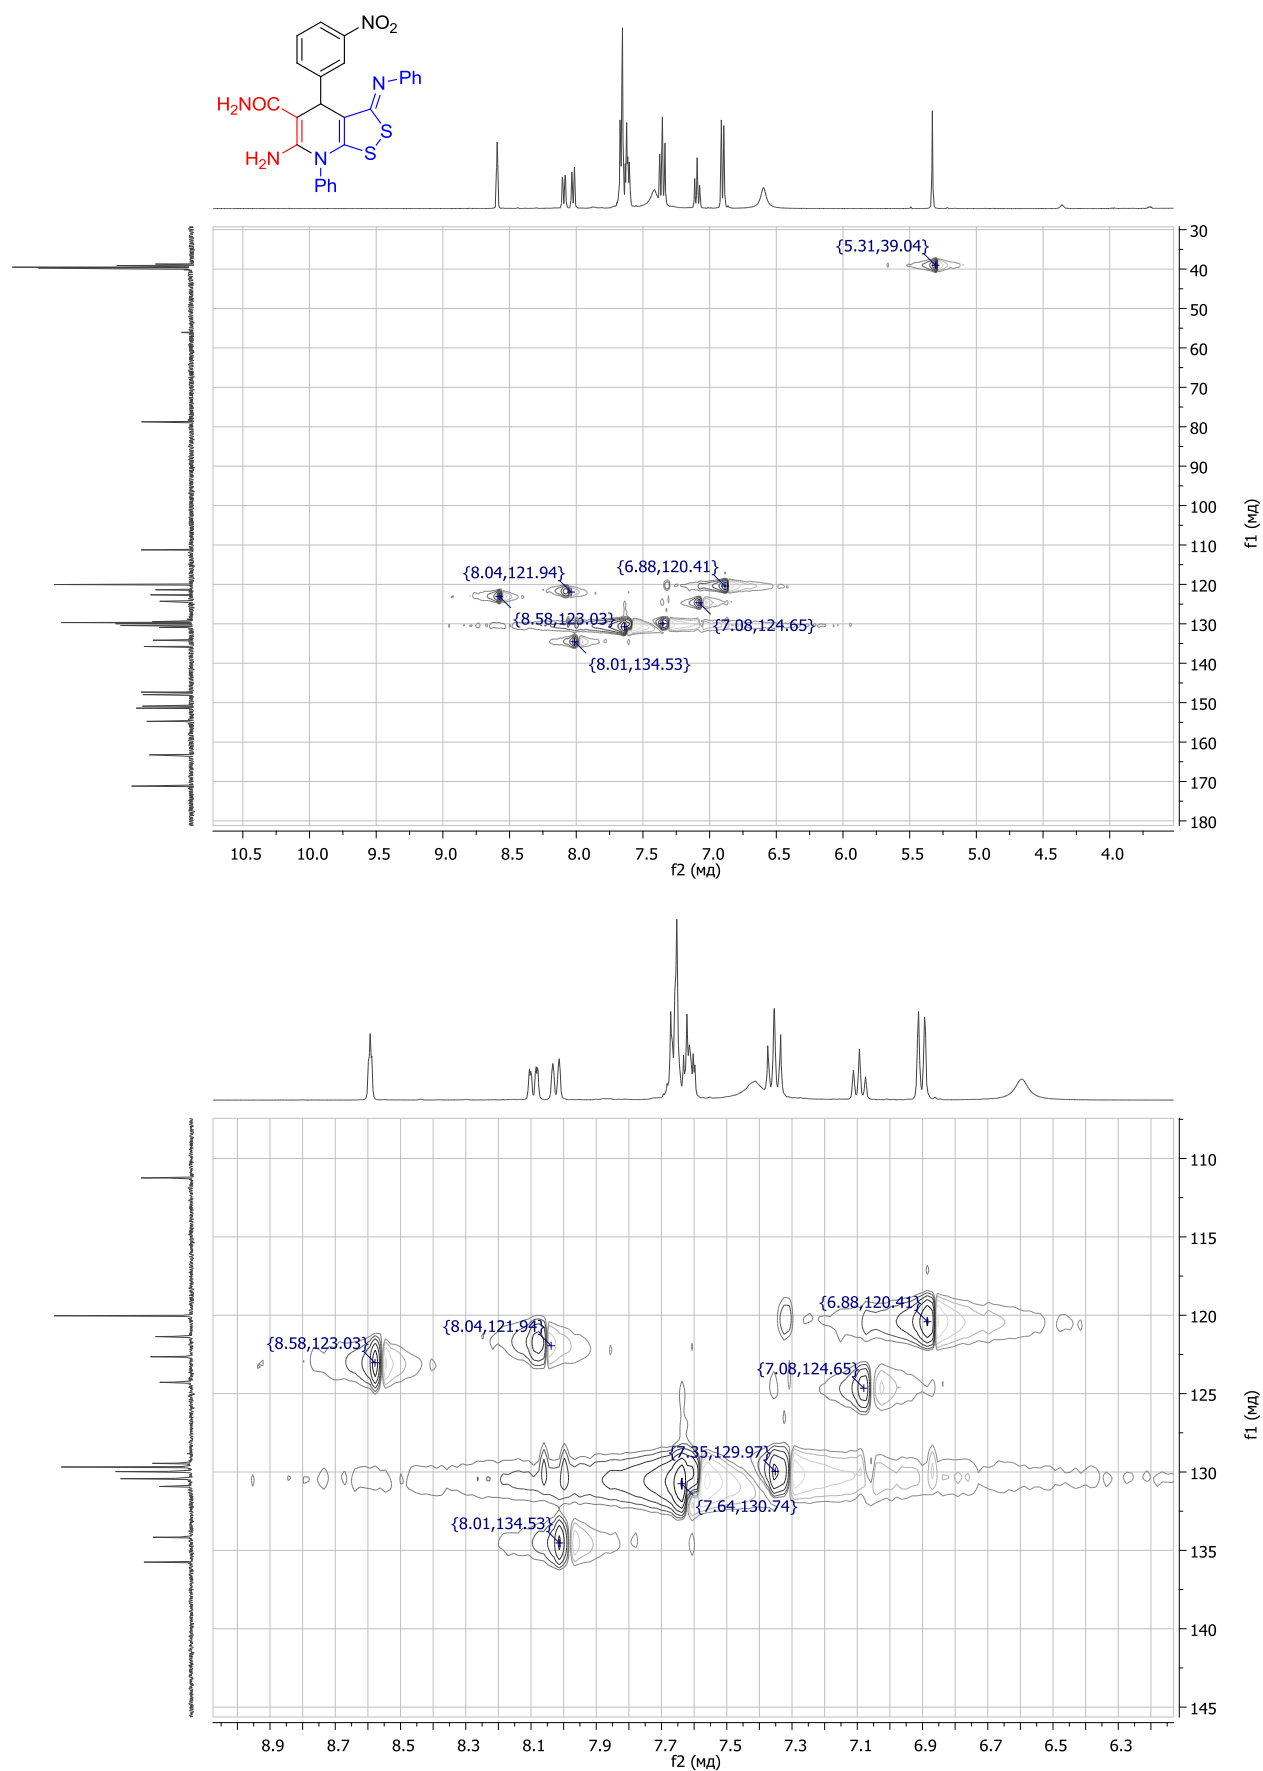



**Table S2. The observed correlations in the  $^1\text{H}$ - $^{13}\text{C}$  HSQC 2D NMR spectrum of compound 3c**  
 $^{13}\text{C}$  chemical shifts are given in **red**,  $^1\text{H}$  shifts – in **blue**

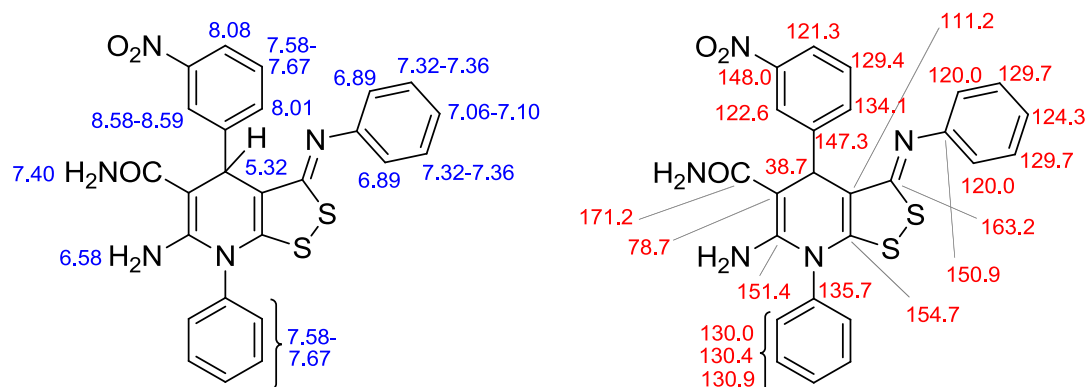

| $^1\text{H}$ NMR shifts, $\delta$ , ppm           | Correlations in HSQC spectrum, $\delta$ , ppm               |
|---------------------------------------------------|-------------------------------------------------------------|
| 5.32 (s, 1H, H-4)                                 | 38.7 (C-4)                                                  |
| 6.58 (br s, 2H, $\text{NH}_2$ )                   | —                                                           |
| 6.89 (d, $^3J = 7.5$ Hz, 2H, H-2 H-6 Ph)          | 120.0 (2C, C-2 C-6 Ph)                                      |
| 7.06-7.10 (m, 1H, H-4 Ph)                         | 124.3 (C-4 Ph)                                              |
| 7.32-7.36 (m, 2H, H-3 H-5 Ph)                     | 129.7 (2C, C-3 C-5 Ph)                                      |
| 7.40 (br s, $\text{CONH}_2$ )                     | —                                                           |
| 7.58-7.67 (m, 6H, H-5 Ar + Ph)                    | 129.4 (C-5 Ar), 130.0 (CH Ph), 130.4 (CH Ph), 130.9 (CH Ph) |
| 8.01 (br d, $^3J = 7.5$ Hz, H-6 Ar)               | 134.1 (C-6 Ar)                                              |
| 8.08 (dd, $^3J = 8.2$ Hz, $^3J = 1.4$ Hz, H-4 Ar) | 121.3 (C-4 Ar)                                              |
| 8.58-8.59 (m, 1H, H-2 Ar)                         | 122.6 (C-2 Ar)                                              |

$^1\text{H}$  NMR (400 MHz,  $\text{DMSO}-d_6$ ): 5.32 (s, 1H, H-4), 6.58 (br s, 2H,  $\text{NH}_2$ ), 6.89 (d,  $^3J = 7.5$  Hz, 2H, H-2 H-6 Ph), 7.06-7.10 (m, 1H, H-4 Ph), 7.32-7.36 (m, 2H, H-3 H-5 Ph), 7.40 (br s,  $\text{CONH}_2$ ), 7.58-7.67 (m, 6H, H-5 Ar + Ph), 8.01 (br d,  $^3J = 7.5$  Hz, H-6 Ar), 8.08 (dd,  $^3J = 8.2$  Hz,  $^3J = 1.4$  Hz, H-4 Ar), 8.58-8.59 (m, 1H, H-2 Ar).

$^{13}\text{C}$  NMR (101 MHz,  $\text{DMSO}-d_6$ ): 38.7 (C-4), 78.7 (C-5), 111.2 (C-3a), 120.0 (2C, C-2 C-6 Ph), 121.3 (C-4 Ar), 122.6 (C-2 Ar), 124.3 (C-4 Ph), 129.4 (C-5 Ar), 129.7 (2C, C-3 C-5 Ph), 130.0 (CH Ph), 130.4 (CH Ph), 130.9 (CH Ph), 134.1 (C-6 Ar), 135.7 (C-1 Ph), 147.3 (C-1 Ar), 148.0 (C- $\text{NO}_2$ ), 150.9 (C-1 Ph), 151.4 (C-6), 154.7 (C-7a), 163.2 (C-3), 171.2 ( $\text{CONH}_2$ ).

Figure S9. FTIR spectrum of compound 3c

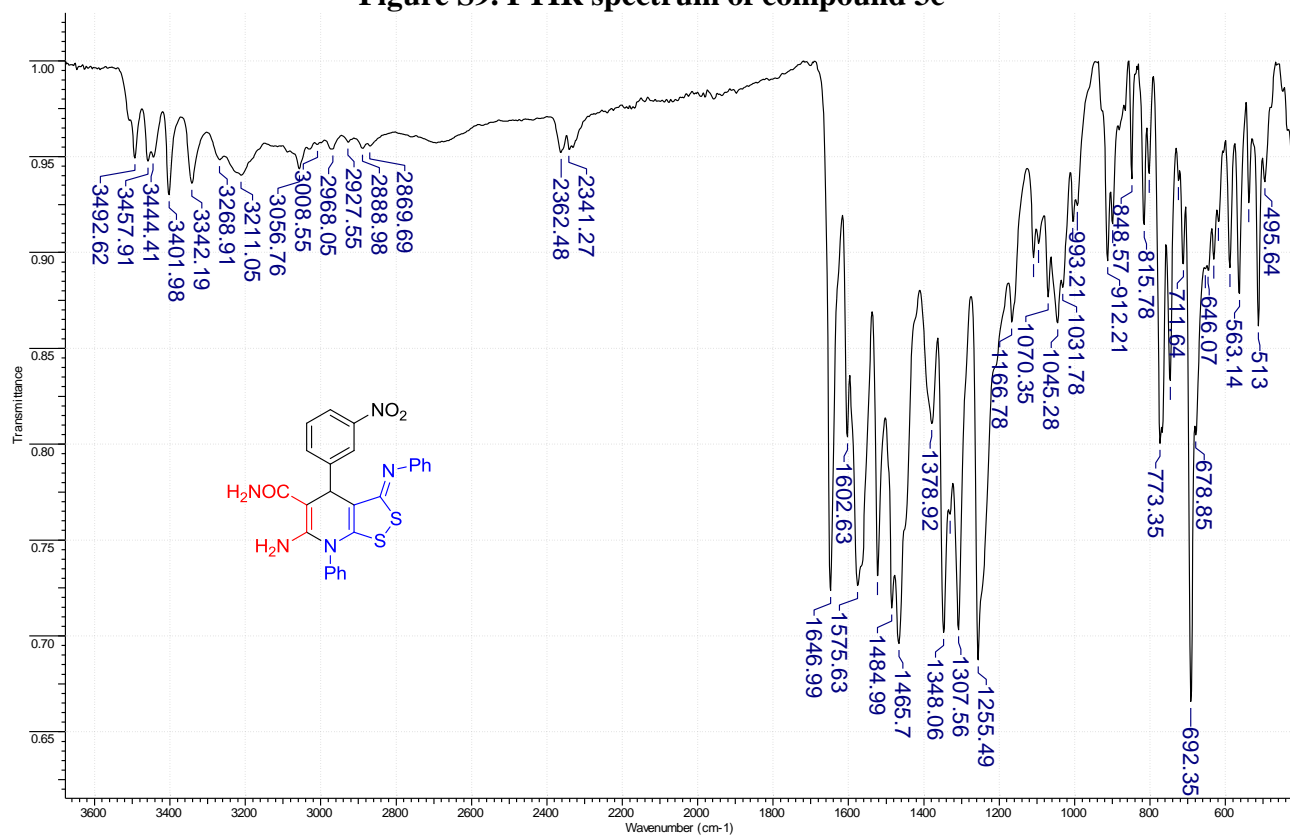

Figure S10. <sup>1</sup>H NMR spectrum of compound 3d (solvate with EtOH), DMSO-d<sub>6</sub> (400 MHz)

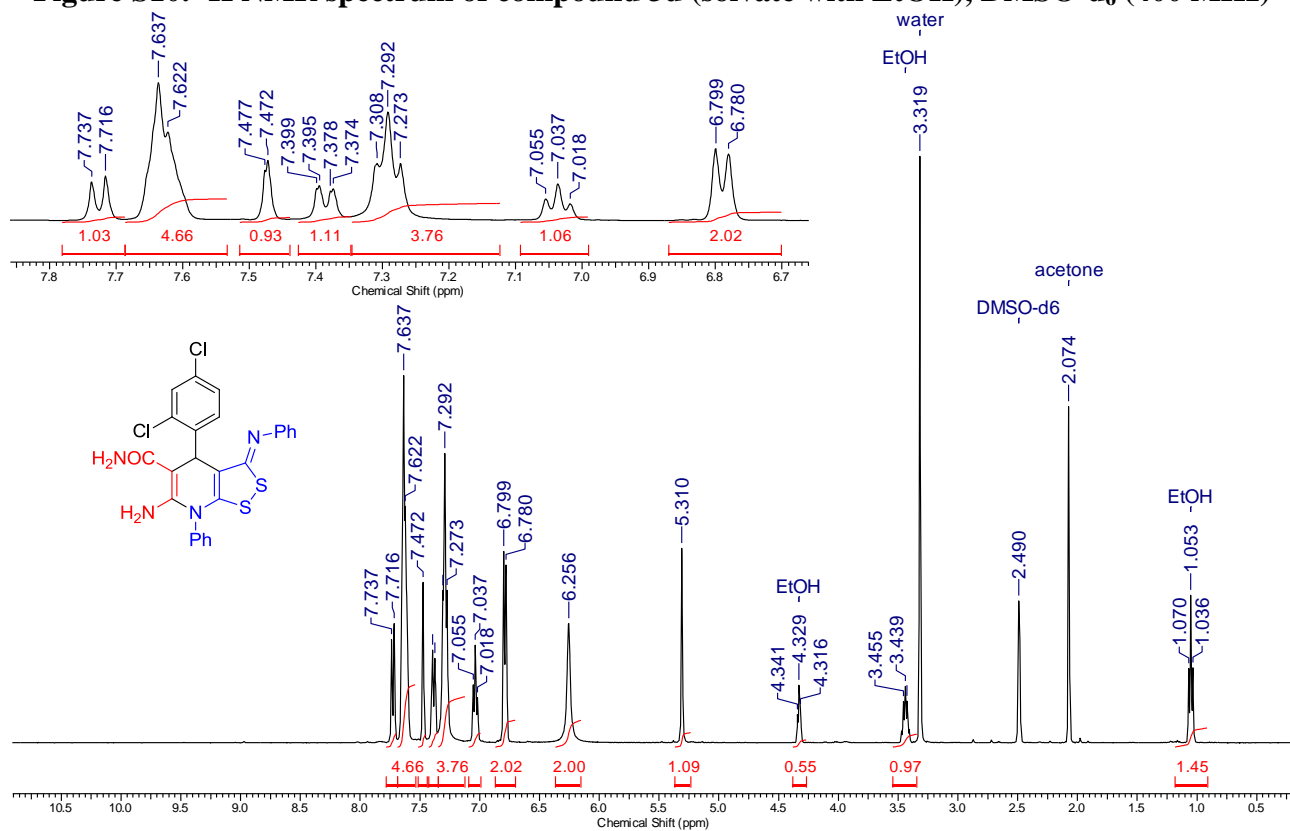

Figure S11.  $^{13}\text{C}$  NMR spectrum of compound 3d (solvate with EtOH), DMSO- $\text{d}_6$  (101 MHz)

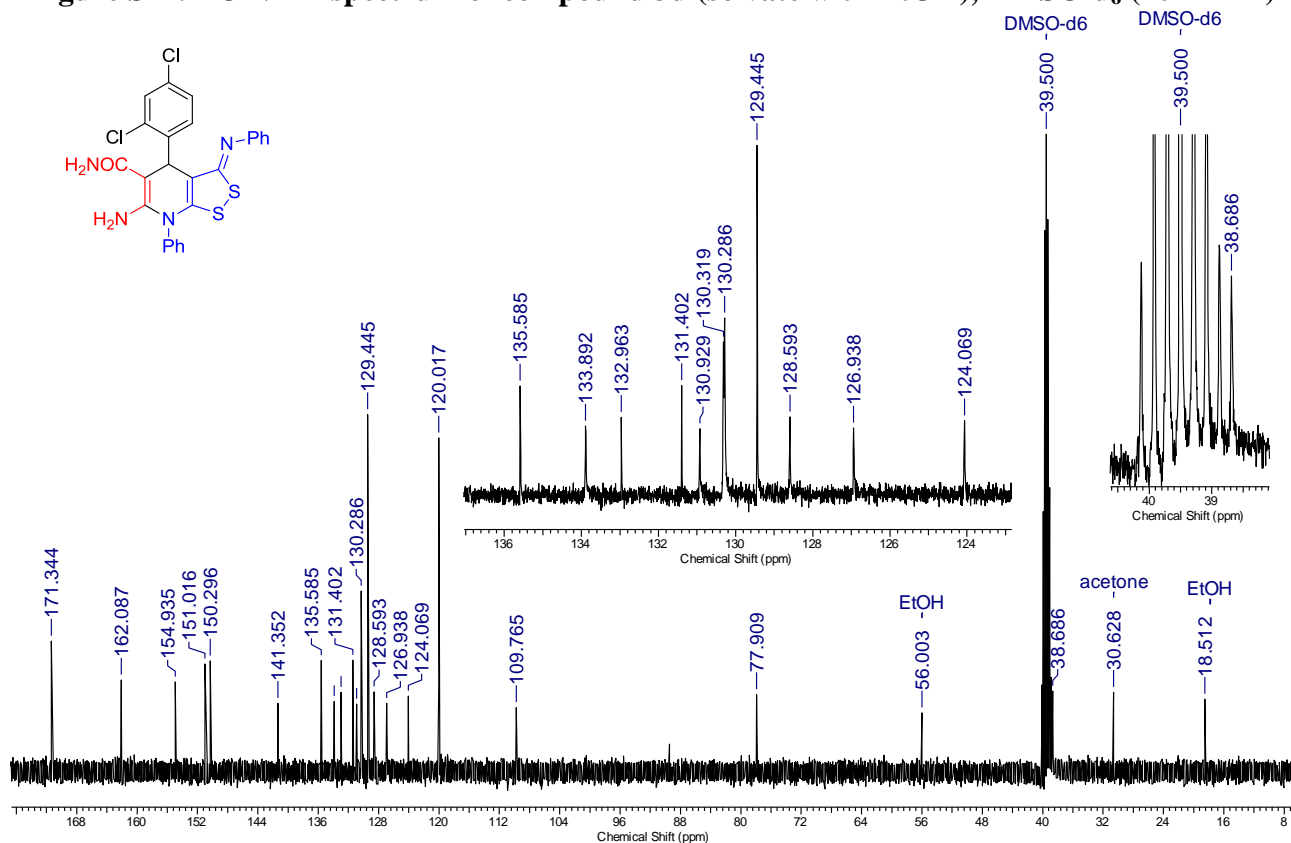

Figure S12.  $^1\text{H}$ - $^1\text{H}$  COSY NMR spectrum of compound 3d (solvate with EtOH), DMSO- $\text{d}_6$  (400/400 MHz)

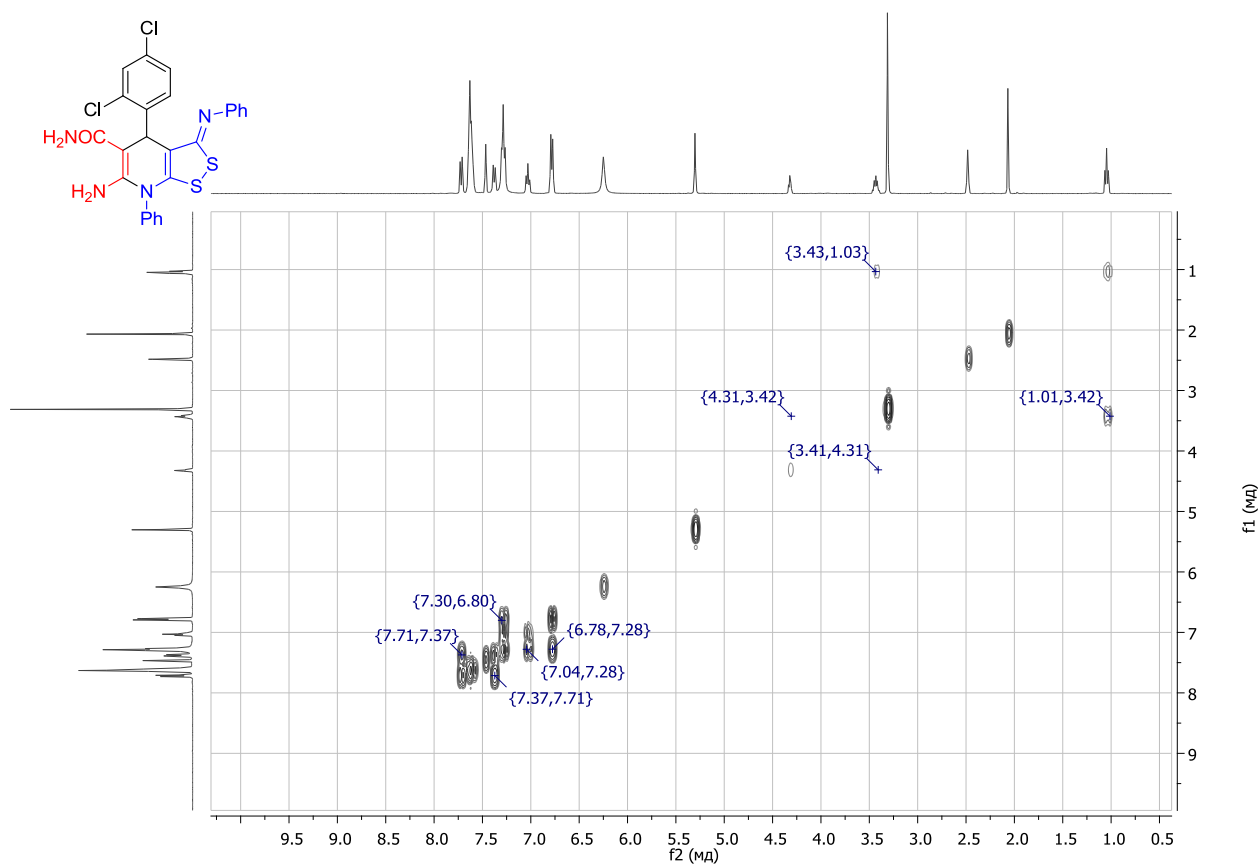

**Figure S13.**  $^1\text{H}$ - $^{13}\text{C}$  HSQC NMR spectrum of compound 3d (solvate with EtOH), DMSO- $d_6$  (100/400 MHz)

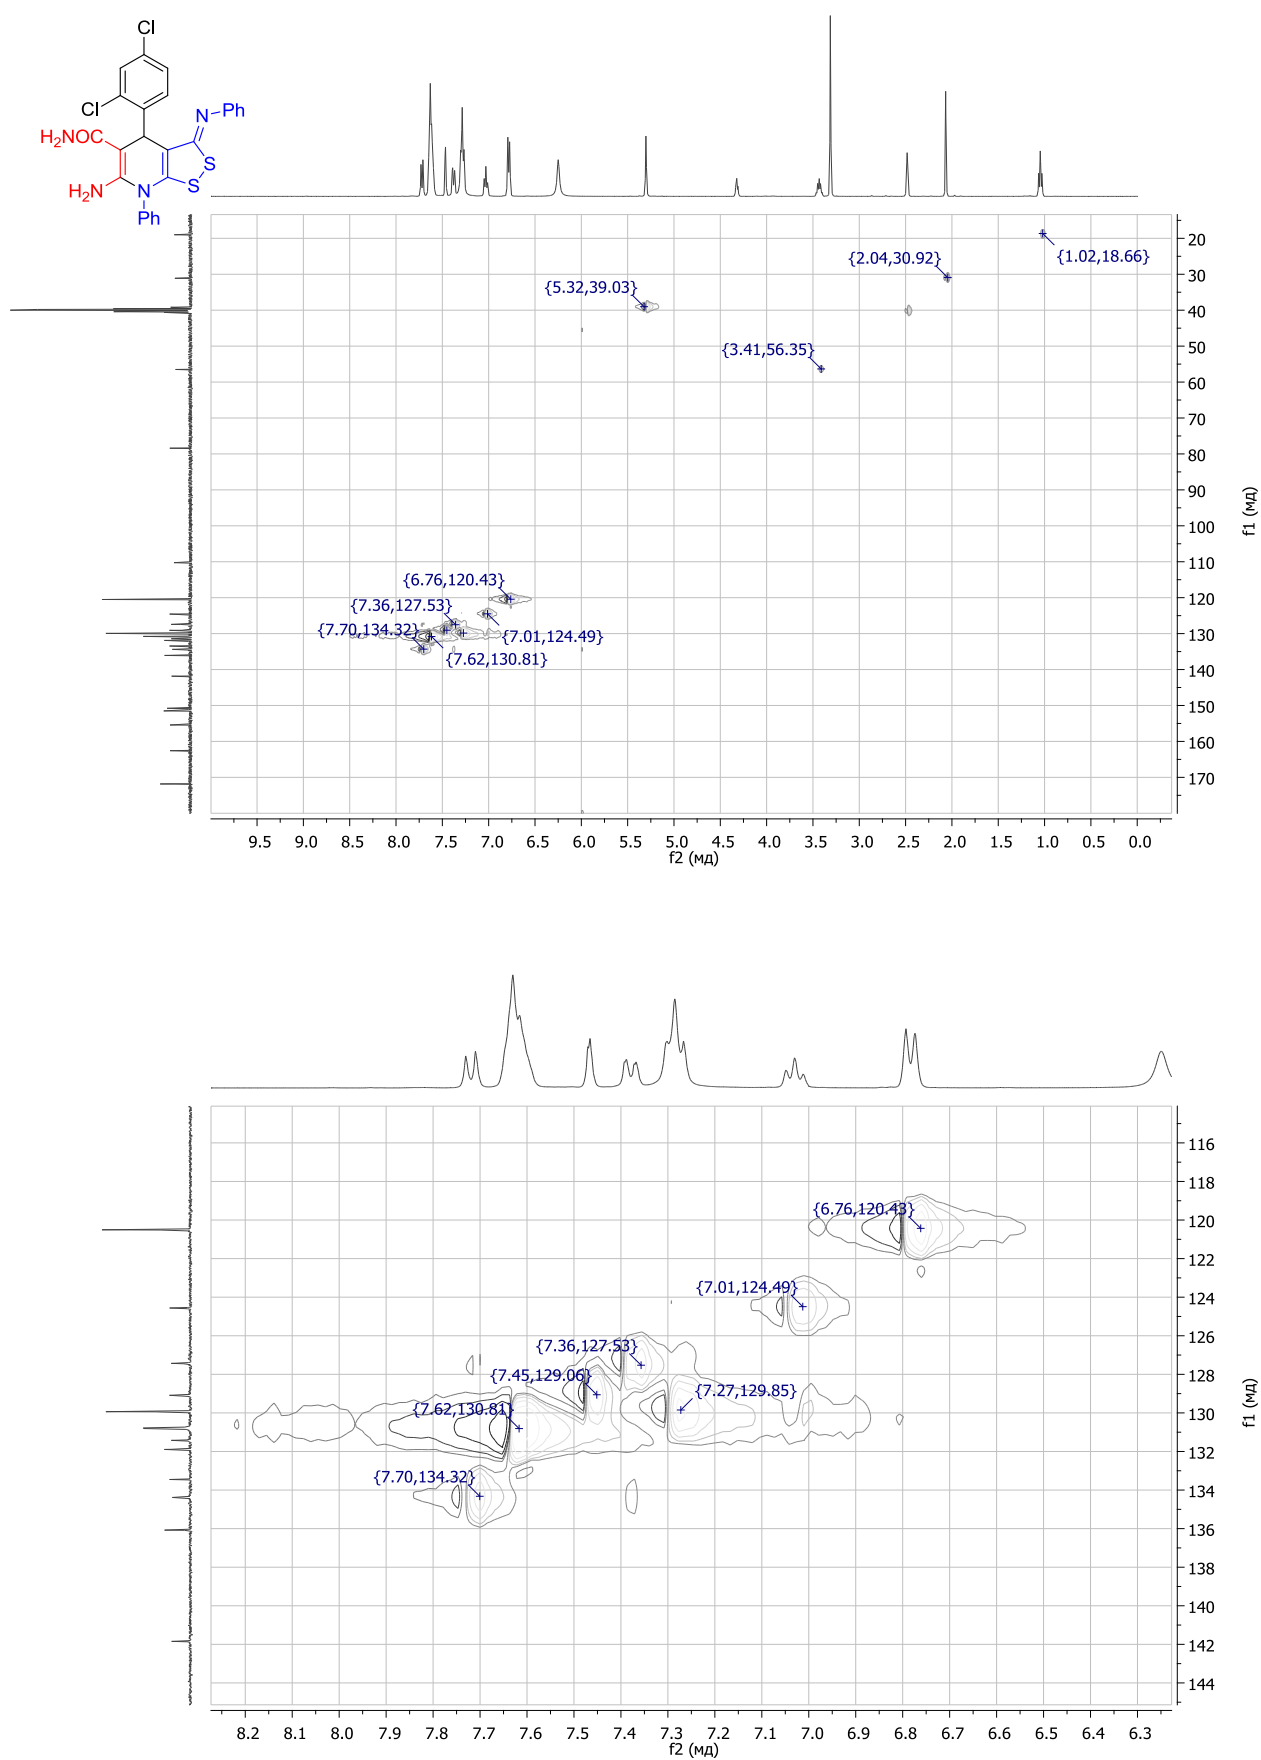

**Figure S14.**  $^1\text{H}$ - $^{13}\text{C}$  HMBC NMR spectrum of compound 3d (solvate with EtOH), DMSO- $\text{d}_6$  (100/400 MHz)

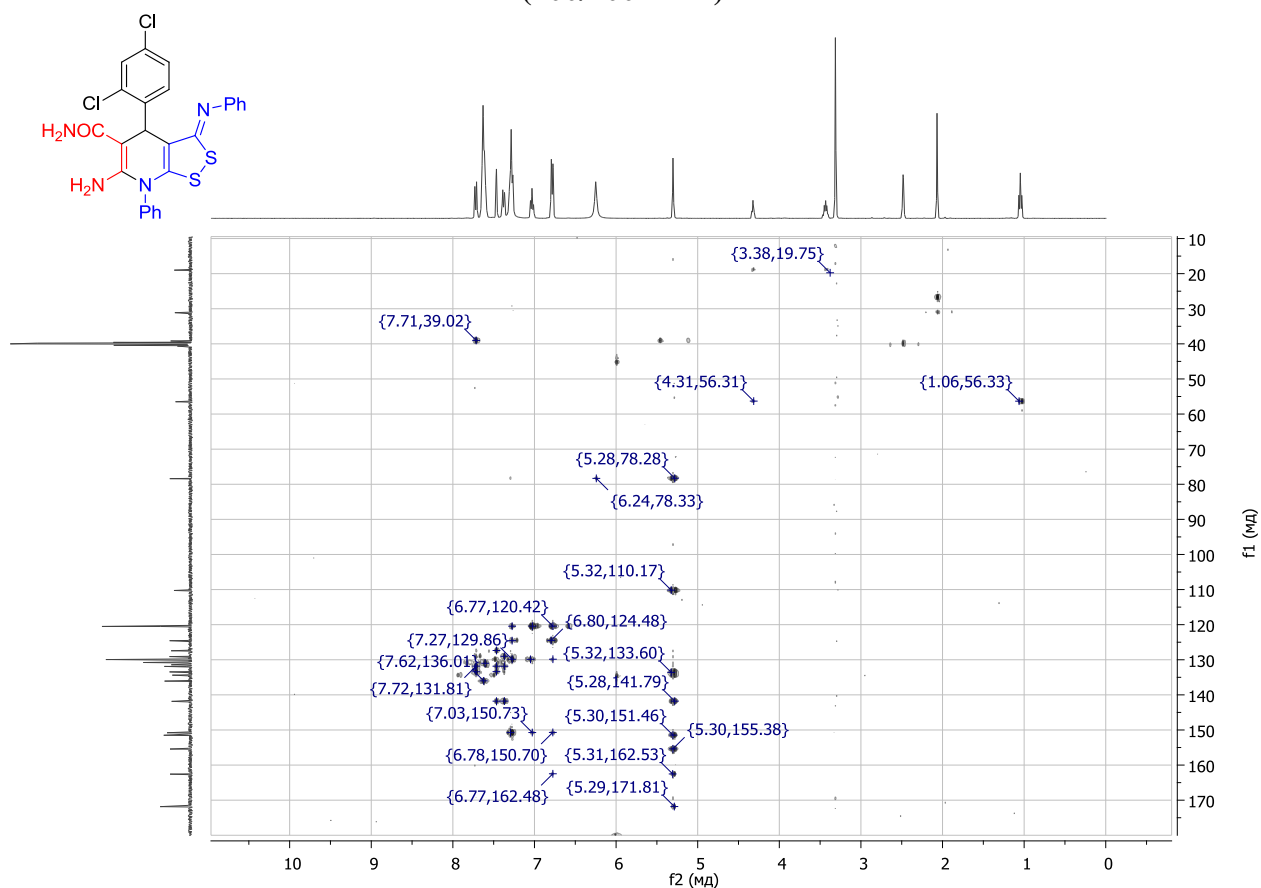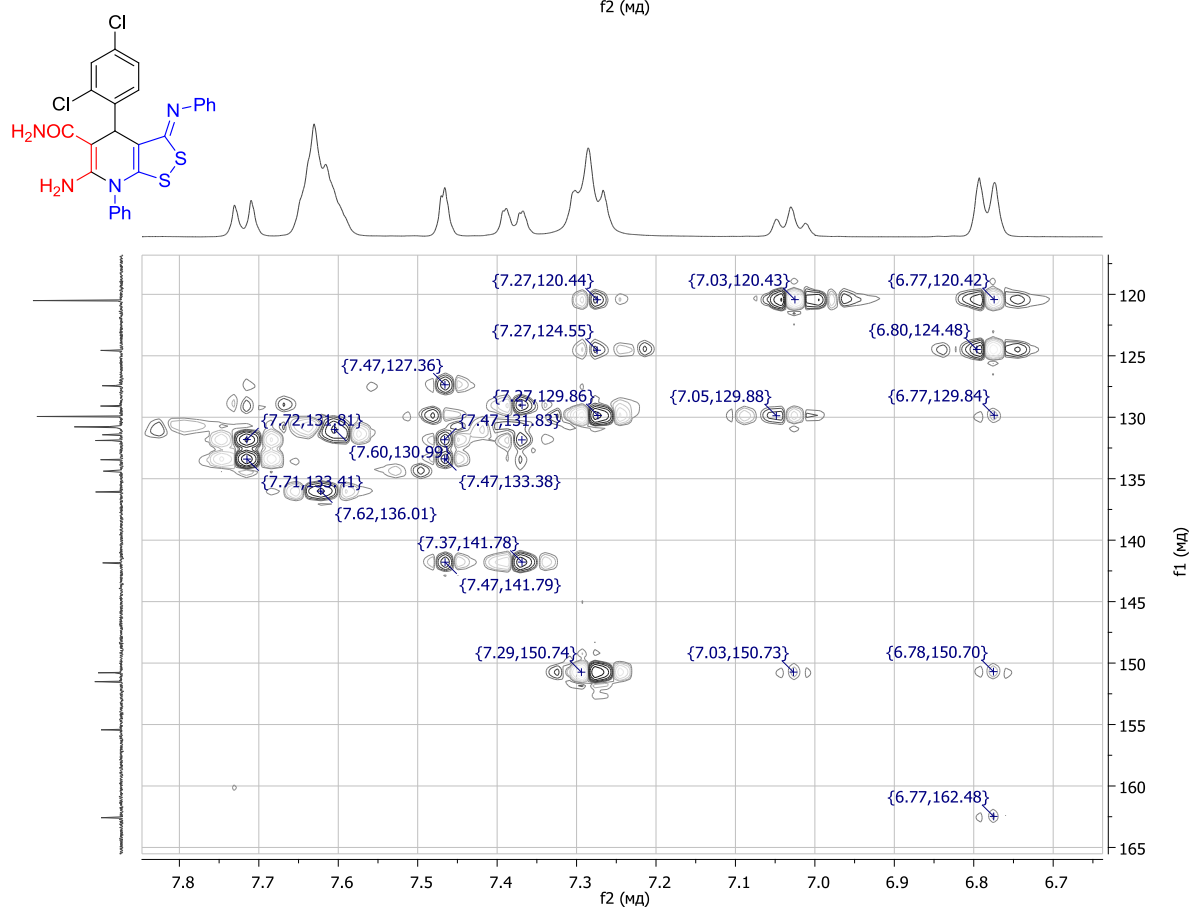

**Table S3. The observed correlations in the  $^1\text{H}$ - $^{13}\text{C}$  HSQC and  $^1\text{H}$ - $^{13}\text{C}$  HMBC 2D NMR spectra of compound 3d (solvate with EtOH), DMSO- $d_6$  (100/400 MHz)**

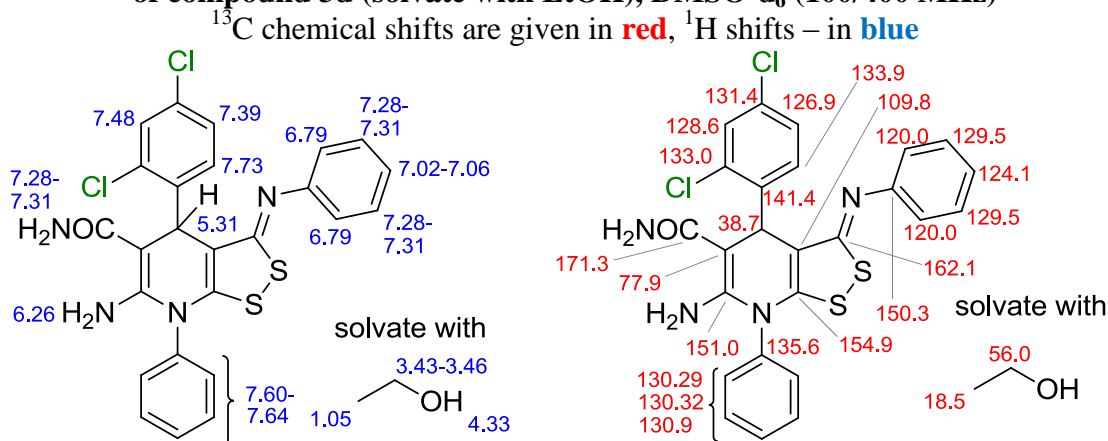

| $^1\text{H}$ NMR shifts, $\delta$ , ppm           | Correlations in HSQC spectrum, $\delta$ , ppm | Correlations in HMBC spectrum, $\delta$ , ppm                                                                                                 |
|---------------------------------------------------|-----------------------------------------------|-----------------------------------------------------------------------------------------------------------------------------------------------|
| 1.05 (t, $^3J = 6.8$ Hz, 3H, EtOH)                | 18.5 (CH <sub>3</sub> EtOH)                   | 56.0 (CH <sub>2</sub> EtOH)                                                                                                                   |
| 3.43-3.46 (m, 2H, EtOH)                           | 56.0 (CH <sub>2</sub> EtOH)                   | 18.5 (CH <sub>3</sub> EtOH)                                                                                                                   |
| 4.33 (t, $^3J = 5.0$ Hz, 1H, EtOH)                | –                                             | 56.0 weak (CH <sub>2</sub> EtOH)                                                                                                              |
| 5.31 (s, 1H, H-4)                                 | 38.7 (C-4)                                    | 77.9 (C-5), 109.8 (C-3a), 133.0 (C–Cl Ar), 133.9 (C-6 Ar), 141.4 (C-1 Ar), 151.0 (C-6), 154.9 (C-7a), 162.1 (C-3), 171.3 (CONH <sub>2</sub> ) |
| 6.26 (br s, 2H, NH <sub>2</sub> )                 | –                                             | 77.9 weak (C-5)                                                                                                                               |
| 6.79 (d, $^3J = 7.5$ Hz, 2H, H-2 H-6 Ph)          | 120.0 (2C, C-2 C-6 Ph)                        | 120.0 (2C, C-2 C-6 Ph), 124.1 (C-4 Ph), 129.5 weak (2C, C-3 C-5 Ph), 150.3 (C-1 Ph), 162.1 weak (C-3)                                         |
| 7.02-7.06 (m, 1H, H-4 Ph)                         | 124.1 (C-4 Ph)                                | 120.0 (2C, C-2 C-6 Ph), 129.5 (2C, C-3 C-5 Ph), 150.3 weak (C-1 Ph)                                                                           |
| 7.28-7.31 (m, 4H, H-3 H-5 Ph, CONH <sub>2</sub> ) | 129.5 (2C, C-3 C-5 Ph)                        | 120.0 (2C, C-2 C-6 Ph), 124.1 (C-4 Ph), 129.5 (2C, C-3 C-5 Ph), 150.3 (C-1 Ph)                                                                |
| 7.39 (dd, $^3J = 8.2$ Hz, $^4J = 1.7$ Hz, H-5 Ar) | 126.9 (C-5 Ar)                                | 128.6 (C-3 Ar), 131.4 (C-4 Ar), 141.4 (C-1 Ar)                                                                                                |
| 7.48 (d, $^4J = 1.7$ Hz, H-3 Ar)                  | 128.6 (C-3 Ar)                                | 126.9 (C-5 Ar), 131.4 (C-4 Ar), 133.0 (C–Cl Ar), 141.4 (C-1 Ar)                                                                               |
| 7.60-7.64 (m, 5H, Ph)                             | 130.29 (CH Ph), 130.32 (CH Ph), 130.9 (CH Ph) | 130.29 (CH Ph), 130.32 (CH Ph), 130.9 (CH Ph), 135.6 (C-1 Ph)                                                                                 |
| 7.73 (d, $^3J = 8.2$ Hz, H-6 Ar)                  | 133.9 (C-6 Ar)                                | 38.7 (C-4), 131.4 (C-4 Ar), 133.0 (C2–Cl Ar)                                                                                                  |

$^1\text{H}$  NMR (400 MHz, DMSO- $d_6$ ): 1.05 (t,  $^3J = 6.8$  Hz, 3H, EtOH), 3.43-3.46 (m, 2H, EtOH), 4.33 (t,  $^3J = 5.0$  Hz, 1H, EtOH), 5.31 (s, 1H, H-4), 6.26 (br s, 2H, NH<sub>2</sub>), 6.79 (d,  $^3J = 7.5$  Hz, 2H, H-2 H-6 Ph), 7.02-7.06 (m, 1H, H-4 Ph), 7.28-7.31 (m, 4H, H-3 H-5 Ph, CONH<sub>2</sub>), 7.39 (dd,  $^3J = 8.2$  Hz,  $^4J = 1.7$  Hz, H-5 Ar), 7.48 (d,  $^4J = 1.7$  Hz, H-3 Ar), 7.60-7.64 (m, 5H, Ph), 7.73 (d,  $^3J = 8.2$  Hz, H-6 Ar).

$^{13}\text{C}$  NMR (101 MHz, DMSO- $d_6$ ): 18.5 (CH<sub>3</sub> EtOH), 38.7 (C-4), 56.0 (CH<sub>2</sub> EtOH), 77.9 (C-5), 109.8 (C-3a), 120.0 (2C, C-2 C-6 Ph), 124.1 (C-4 Ph), 126.9 (C-5 Ar), 128.6 (C-3 Ar), 129.5 (2C, C-3 C-5 Ph), 130.29 (CH Ph), 130.32 (CH Ph), 130.9 (CH Ph), 131.4 (C-4 Ar), 133.0 (C–Cl Ar), 133.9 (C-6 Ar), 135.6 (C-1 Ph), 141.4 (C-1 Ar), 150.3 (C-1 Ph), 151.0 (C-6), 154.9 (C-7a), 162.1 (C-3), 171.3 (CONH<sub>2</sub>).

Figure S15. FTIR spectrum of compound 3d

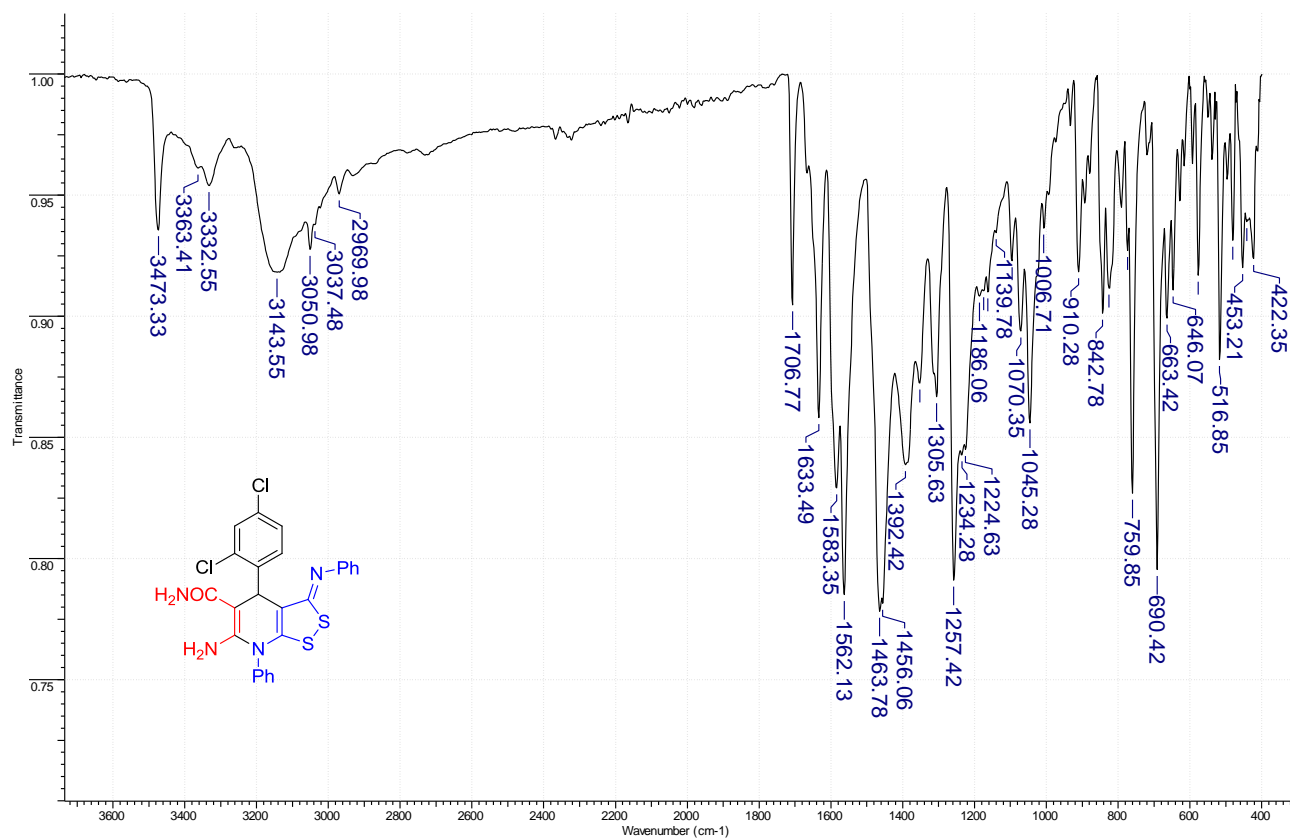

**Figure S16. ORTEP drawings of the crystal structure showing 50% probability thermal ellipsoids (CCDC 2310349) and microphotography of the single crystal of compound 3d used for X-Ray diffraction analysis at the bottom.**

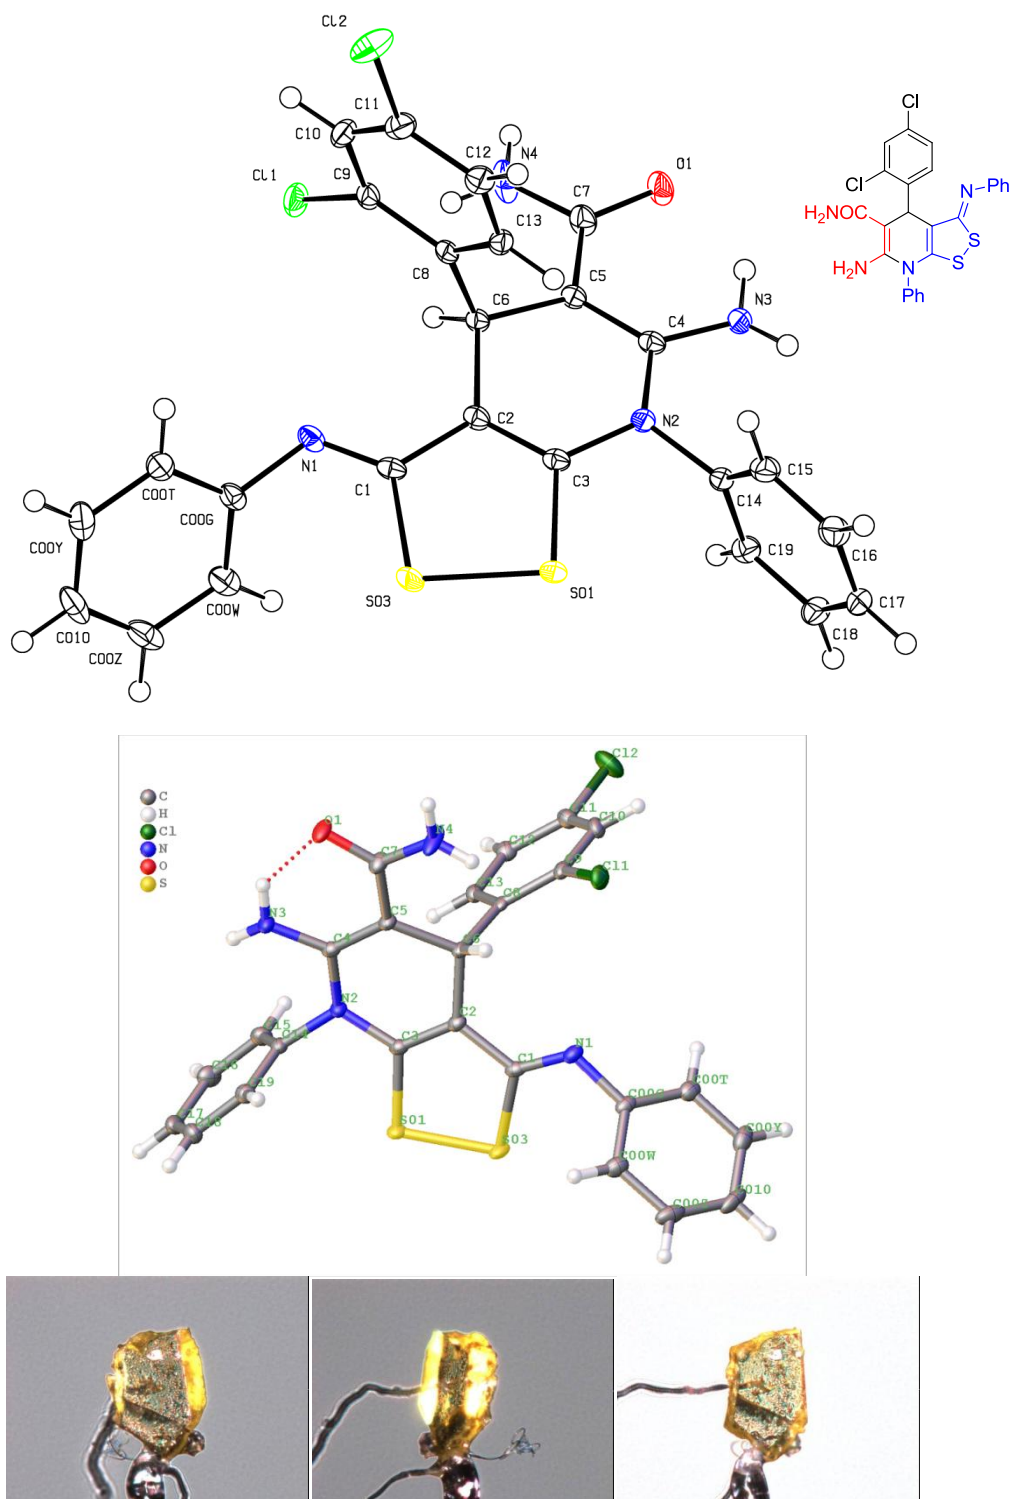



**Table S4. Crystal data and structure refinement for 6-amino-4-(2,4-dichlorophenyl)-7-phenyl-3-(phenylimino)-4,7-dihydro-3H-[1,2]dithiolo[3,4-b]pyridine-5-carboxamide 3d**

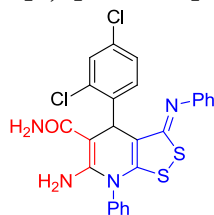

|                                             |                                                                                |
|---------------------------------------------|--------------------------------------------------------------------------------|
| Identification code                         | ANNA_SAE106_2                                                                  |
| Empirical formula                           | C <sub>25</sub> H <sub>18</sub> Cl <sub>2</sub> N <sub>4</sub> OS <sub>2</sub> |
| Formula weight                              | 525.45                                                                         |
| Temperature/K                               | 100.00(10)                                                                     |
| Crystal system                              | monoclinic                                                                     |
| Space group                                 | I2/a                                                                           |
| a/Å                                         | 11.97350(10)                                                                   |
| b/Å                                         | 12.96920(10)                                                                   |
| c/Å                                         | 34.4739(2)                                                                     |
| α/°                                         | 90                                                                             |
| β/°                                         | 90.7890(10)                                                                    |
| γ/°                                         | 90                                                                             |
| Volume/Å <sup>3</sup>                       | 5352.83(7)                                                                     |
| Z                                           | 8                                                                              |
| ρ <sub>calc</sub> /g/cm <sup>3</sup>        | 1.304                                                                          |
| μ/mm <sup>-1</sup>                          | 3.837                                                                          |
| F(000)                                      | 2160.0                                                                         |
| Crystal size/mm <sup>3</sup>                | 0.507 × 0.386 × 0.167                                                          |
| Radiation                                   | Cu Kα (λ = 1.54184)                                                            |
| 2Θ range for data collection/               | 7.282 to 153.23                                                                |
| Index ranges                                | -14 ≤ h ≤ 12, -15 ≤ k ≤ 16, -43 ≤ l ≤ 43                                       |
| Reflections collected                       | 29542                                                                          |
| Independent reflections                     | 5572 [R <sub>int</sub> = 0.0263, R <sub>sigma</sub> = 0.0158]                  |
| Data/restraints/parameters                  | 5572/0/323                                                                     |
| Goodness-of-fit on F <sup>2</sup>           | 1.048                                                                          |
| Final R indexes [I ≥ 2σ (I)]                | R <sub>1</sub> = 0.0352, wR <sub>2</sub> = 0.0936                              |
| Final R indexes [all data]                  | R <sub>1</sub> = 0.0356, wR <sub>2</sub> = 0.0939                              |
| Largest diff. peak/hole / e Å <sup>-3</sup> | 0.34/-0.44                                                                     |

**Table S5. Fractional Atomic Coordinates ( $\times 10^4$ ) and Equivalent Isotropic Displacement Parameters ( $\text{\AA}^2 \times 10^3$ ) for compound 3d.  $U_{\text{eq}}$  is defined as 1/3 of the trace of the orthogonalised  $U_{\text{H}}$  tensor.**

| Atom | <i>x</i>   | <i>y</i>   | <i>z</i>  | $U(\text{eq})$ |
|------|------------|------------|-----------|----------------|
| S01  | 2860.6(3)  | 6914.6(3)  | 2896.5(2) | 16.39(10)      |
| Cl1  | 7647.4(3)  | 5958.7(3)  | 3929.7(2) | 20.73(10)      |
| S03  | 4330.3(3)  | 6571.3(3)  | 2614.7(2) | 18.15(10)      |
| Cl2  | 7933.1(4)  | 10013.6(4) | 4195.1(2) | 30.45(12)      |
| O1   | 3800.9(10) | 5693.2(11) | 4756.5(3) | 22.3(3)        |
| N2   | 2753.5(11) | 6928.8(11) | 3668.3(4) | 13.9(3)        |
| N1   | 6138.5(12) | 5934.7(11) | 3035.9(4) | 15.9(3)        |
| N3   | 2257.4(12) | 6541.5(12) | 4300.6(4) | 17.0(3)        |
| N4   | 5472.7(15) | 5294.0(15) | 4512.5(5) | 30.8(4)        |
| C2   | 4518.0(14) | 6435.5(12) | 3396.1(4) | 13.7(3)        |
| C8   | 5811.3(13) | 7221.7(13) | 3885.2(4) | 13.4(3)        |
| C14  | 1597.5(13) | 7169.5(13) | 3571.9(4) | 14.2(3)        |
| C5   | 4145.5(13) | 6175.7(13) | 4097.7(4) | 13.7(3)        |
| C00G | 6642.1(14) | 5730.9(13) | 2673.0(5) | 15.8(3)        |
| C13  | 5345.5(13) | 8208.5(13) | 3915.2(5) | 15.0(3)        |
| C1   | 5131.1(14) | 6255.5(12) | 3045.1(4) | 14.2(3)        |
| C3   | 3446.9(14) | 6749.8(12) | 3358.4(4) | 13.5(3)        |
| C4   | 3073.4(14) | 6542.9(12) | 4036.0(4) | 13.6(3)        |
| C19  | 896.3(14)  | 6383.5(13) | 3444.7(5) | 16.5(3)        |
| C15  | 1248.0(15) | 8186.3(13) | 3577.8(5) | 18.2(3)        |
| C12  | 5971.2(14) | 9073.9(13) | 4009.6(5) | 17.6(3)        |
| C6   | 5047.4(13) | 6302.6(12) | 3792.7(4) | 12.8(3)        |
| C7   | 4449.1(15) | 5711.0(14) | 4470.7(5) | 18.4(3)        |
| C10  | 7626.1(14) | 7996.2(14) | 4040.5(5) | 19.5(3)        |
| C11  | 7114.5(15) | 8945.6(14) | 4071.2(5) | 19.5(3)        |
| C18  | -178.4(14) | 6629.7(14) | 3318.1(5) | 19.6(3)        |
| C00T | 7617.5(14) | 6253.4(14) | 2579.3(5) | 18.8(3)        |
| C9   | 6963.7(14) | 7143.2(13) | 3949.6(4) | 15.9(3)        |
| C17  | -535.8(14) | 7650.0(15) | 3319.5(5) | 20.2(3)        |
| C00W | 6215.0(16) | 4986.8(13) | 2418.2(5) | 20.2(3)        |
| C16  | 173.7(15)  | 8426.2(14) | 3448.9(5) | 21.6(4)        |
| C00Y | 8138.0(16) | 6070.9(15) | 2227.1(5) | 24.3(4)        |
| C00Z | 6750.2(17) | 4801.2(15) | 2067.4(5) | 25.2(4)        |
| C010 | 7702.3(17) | 5348.7(16) | 1972.1(5) | 26.7(4)        |

**Table S6. Anisotropic Displacement Parameters ( $\text{\AA}^2 \times 10^3$ ) for 3d. The Anisotropic displacement factor exponent takes the form:  $-2\pi^2[h^2a^{*2}U_{11}+...+2hka^*b^*U_{12}+ ...]$**

| Atom | $U_{11}$  | $U_{22}$ | $U_{33}$ | $U_{23}$ | $U_{13}$   | $U_{12}$  |
|------|-----------|----------|----------|----------|------------|-----------|
| S01  | 15.89(19) | 24.4(2)  | 8.86(17) | 1.07(14) | -1.83(14)  | 0.95(15)  |
| C11  | 14.25(19) | 25.2(2)  | 22.8(2)  | 2.33(15) | 2.20(15)   | 6.88(15)  |
| S03  | 19.8(2)   | 26.6(2)  | 8.06(17) | 0.94(14) | 0.44(14)   | 3.14(16)  |
| C12  | 22.7(2)   | 27.4(2)  | 40.9(3)  | 3.31(19) | -12.88(19) | -7.62(17) |
| O1   | 20.3(6)   | 33.8(7)  | 12.8(5)  | 8.8(5)   | 5.4(5)     | 6.7(5)    |
| N2   | 12.5(6)   | 19.4(7)  | 9.9(6)   | 1.8(5)   | -0.1(5)    | 0.0(5)    |
| N1   | 19.7(7)   | 17.4(7)  | 10.5(6)  | 0.9(5)   | 2.2(5)     | 1.5(5)    |
| N3   | 13.2(7)   | 26.9(8)  | 10.8(7)  | 2.1(5)   | 1.1(5)     | 0.1(6)    |
| N4   | 26.0(8)   | 50.1(11) | 16.6(7)  | 18.3(7)  | 9.9(6)     | 19.8(8)   |
| C2   | 16.5(8)   | 14.2(7)  | 10.5(7)  | 1.4(6)   | 1.0(6)     | -1.2(6)   |
| C8   | 13.9(7)   | 19.1(8)  | 7.1(6)   | 2.8(6)   | 2.0(5)     | 0.8(6)    |
| C14  | 12.7(7)   | 20.0(8)  | 9.9(7)   | 1.5(6)   | 0.0(5)     | 0.4(6)    |
| C5   | 14.8(7)   | 17.0(7)  | 9.2(7)   | 2.3(6)   | 0.5(6)     | 0.3(6)    |
| C00G | 19.9(8)   | 16.7(8)  | 10.7(7)  | 2.0(6)   | 0.9(6)     | 6.3(6)    |
| C13  | 12.1(7)   | 20.7(8)  | 12.2(7)  | 3.1(6)   | -0.1(6)    | 1.3(6)    |
| C1   | 19.3(8)   | 13.4(7)  | 9.7(7)   | 1.2(6)   | -1.0(6)    | -2.0(6)   |
| C3   | 16.3(8)   | 14.0(7)  | 10.0(7)  | 0.6(5)   | -0.6(6)    | -2.0(6)   |
| C4   | 16.8(8)   | 13.9(7)  | 10.0(7)  | 0.8(6)   | 0.1(6)     | -2.0(6)   |
| C19  | 17.4(8)   | 16.8(8)  | 15.2(7)  | 2.1(6)   | -0.4(6)    | -1.3(6)   |
| C15  | 19.3(8)   | 18.0(8)  | 17.2(8)  | -3.2(6)  | -1.8(6)    | -0.9(6)   |
| C12  | 18.8(8)   | 18.7(8)  | 15.4(7)  | 3.7(6)   | -0.5(6)    | 0.5(6)    |
| C6   | 13.2(7)   | 16.2(7)  | 9.0(7)   | 2.1(5)   | 0.2(5)     | 2.0(6)    |
| C7   | 19.3(8)   | 22.0(8)  | 13.8(7)  | 5.7(6)   | 3.4(6)     | 3.2(7)    |
| C10  | 11.1(7)   | 29.8(9)  | 17.5(8)  | 3.5(7)   | -1.1(6)    | 0.5(7)    |
| C11  | 17.7(8)   | 23.9(9)  | 16.7(8)  | 2.5(6)   | -2.0(6)    | -4.8(7)   |
| C18  | 15.5(8)   | 24.5(9)  | 18.8(8)  | -0.5(7)  | -0.2(6)    | -3.9(7)   |
| C00T | 19.1(8)   | 21.5(8)  | 15.8(8)  | 1.1(6)   | -0.4(6)    | 6.1(7)    |
| C9   | 14.1(8)   | 23.2(8)  | 10.4(7)  | 3.1(6)   | 2.0(6)     | 3.6(6)    |
| C17  | 13.5(8)   | 30.7(9)  | 16.3(8)  | -1.7(7)  | -1.5(6)    | 5.0(7)    |
| C00W | 25.6(9)   | 18.9(8)  | 16.2(8)  | -1.0(6)  | 0.3(7)     | 3.4(7)    |
| C16  | 23.2(9)   | 20.7(8)  | 21.0(8)  | -3.1(7)  | -1.6(7)    | 6.6(7)    |
| C00Y | 20.8(9)   | 30.1(10) | 22.2(9)  | 7.3(7)   | 7.1(7)     | 8.5(7)    |
| C00Z | 37.5(11)  | 23.3(9)  | 14.7(8)  | -4.0(7)  | -2.3(7)    | 12.9(8)   |
| C010 | 34.3(10)  | 32.6(10) | 13.3(8)  | 2.6(7)   | 7.5(7)     | 17.9(8)   |

**Table S7. Bond Lengths for compound 3d.**

| Atom | Atom | Length/Å   | Atom | Atom | Length/Å |
|------|------|------------|------|------|----------|
| S01  | S03  | 2.0701(6)  | C14  | C19  | 1.388(2) |
| S01  | C3   | 1.7447(16) | C14  | C15  | 1.384(2) |
| Cl1  | C9   | 1.7425(17) | C5   | C4   | 1.383(2) |
| S03  | C1   | 1.8024(16) | C5   | C6   | 1.527(2) |
| Cl2  | C11  | 1.7465(18) | C5   | C7   | 1.462(2) |
| O1   | C7   | 1.263(2)   | C00G | C00T | 1.392(3) |
| N2   | C14  | 1.453(2)   | C00G | C00W | 1.397(2) |
| N2   | C3   | 1.382(2)   | C13  | C12  | 1.386(2) |
| N2   | C4   | 1.411(2)   | C19  | C18  | 1.390(2) |
| N1   | C00G | 1.421(2)   | C15  | C16  | 1.390(2) |
| N1   | C1   | 1.277(2)   | C12  | C11  | 1.392(2) |
| N3   | C4   | 1.346(2)   | C10  | C11  | 1.380(3) |
| N4   | C7   | 1.346(2)   | C10  | C9   | 1.394(3) |
| C2   | C1   | 1.443(2)   | C18  | C17  | 1.391(3) |
| C2   | C3   | 1.350(2)   | C00T | C00Y | 1.393(2) |
| C2   | C6   | 1.509(2)   | C17  | C16  | 1.387(3) |
| C8   | C13  | 1.400(2)   | C00W | C00Z | 1.397(2) |
| C8   | C6   | 1.533(2)   | C00Y | C010 | 1.382(3) |
| C8   | C9   | 1.398(2)   | C00Z | C010 | 1.386(3) |

**Table S8. Bond Angles for compound 3d.**

| Atom       | Atom     | Atom | Angle/°    | Atom | Atom     | Atom | Angle/°    |
|------------|----------|------|------------|------|----------|------|------------|
| C3         | S01      | S03  | 93.89(6)   | N3   | C4       | N2   | 114.75(14) |
| C1         | S03      | S01  | 96.24(6)   | N3   | C4       | C5   | 125.19(15) |
| C3         | N2       | C14  | 116.10(13) | C5   | C4       | N2   | 120.03(14) |
| C3         | N2       | C4   | 118.45(14) | C14  | C19      | C18  | 118.93(16) |
| C4         | N2       | C14  | 121.86(13) | C14  | C15      | C16  | 119.16(16) |
| C1         | N1       | C00G | 119.66(14) | C13  | C12      | C11  | 117.79(16) |
| C1         | C2       | C6   | 121.95(14) | C2   | C6       | C8   | 109.98(13) |
| C3         | C2       | C1   | 117.48(14) | C2   | C6       | C5   | 110.12(13) |
| C3         | C2       | C6   | 120.56(14) | C5   | C6       | C8   | 111.47(13) |
| C13        | C8       | C6   | 119.26(14) | O1   | C7       | N4   | 118.54(15) |
| C9         | C8       | C13  | 116.61(15) | O1   | C7       | C5   | 123.08(15) |
| C9         | C8       | C6   | 124.12(15) | N4   | C7       | C5   | 118.37(15) |
| C19        | C14      | N2   | 118.99(15) | C11  | C10      | C9   | 118.26(15) |
| C15        | C14      | N2   | 119.26(15) | C12  | C11      | Cl2  | 119.33(14) |
| C15        | C14      | C19  | 121.52(15) | C10  | C11      | Cl2  | 118.57(13) |
| C4         | C5       | C6   | 121.39(14) | C10  | C11      | C12  | 122.10(16) |
| C4         | C5       | C7   | 119.77(14) | C19  | C18      | C17  | 120.06(16) |
| C7         | C5       | C6   | 118.74(14) | C00G | C00T     | C00Y | 120.44(17) |
| C00T       | C00GN1   |      | 118.77(15) | C8   | C9       | Cl1  | 121.40(13) |
| C00T       | C00GC00W |      | 119.43(15) | C10  | C9       | Cl1  | 116.25(13) |
| C00WC00GN1 |          |      | 121.72(16) | C10  | C9       | C8   | 122.34(16) |
| C12        | C13      | C8   | 122.89(15) | C16  | C17      | C18  | 120.31(16) |
| N1         | C1       | S03  | 123.07(12) | C00G | C00WC00Z |      | 119.66(18) |
| N1         | C1       | C2   | 124.41(15) | C17  | C16      | C15  | 120.02(16) |
| C2         | C1       | S03  | 112.49(12) | C010 | C00Y     | C00T | 120.02(18) |
| N2         | C3       | S01  | 116.53(12) | C010 | C00Z     | C00W | 120.35(18) |
| C2         | C3       | S01  | 119.64(12) | C00Y | C010     | C00Z | 120.05(16) |
| C2         | C3       | N2   | 123.80(14) |      |          |      |            |

**Table S9. Torsion Angles for compound 3d**

| A    | B    | C    | D    | Angle/°     | A    | B    | C    | D    | Angle/°     |
|------|------|------|------|-------------|------|------|------|------|-------------|
| S01  | S03  | C1   | N1   | 177.01(14)  | C4   | N2   | C14  | C19  | -84.06(19)  |
| S01  | S03  | C1   | C2   | -4.70(12)   | C4   | N2   | C14  | C15  | 101.32(18)  |
| S03  | S01  | C3   | N2   | 178.51(12)  | C4   | N2   | C3   | S01  | 162.83(12)  |
| S03  | S01  | C3   | C2   | -3.21(14)   | C4   | N2   | C3   | C2   | -15.4(2)    |
| N2   | C14  | C19  | C18  | -174.05(14) | C4   | C5   | C6   | C2   | -23.4(2)    |
| N2   | C14  | C15  | C16  | 173.72(15)  | C4   | C5   | C6   | C8   | 98.94(17)   |
| N1   | C00G | C00T | C00Y | 179.72(15)  | C4   | C5   | C7   | O1   | -5.6(3)     |
| N1   | C00G | C00W | C00Z | -178.90(15) | C4   | C5   | C7   | N4   | 175.28(18)  |
| C8   | C13  | C12  | C11  | 0.9(2)      | C19  | C14  | C15  | C16  | -0.8(3)     |
| C14  | N2   | C3   | S01  | 3.78(19)    | C19  | C18  | C17  | C16  | -0.3(3)     |
| C14  | N2   | C3   | C2   | -174.42(15) | C15  | C14  | C19  | C18  | 0.5(2)      |
| C14  | N2   | C4   | N3   | -8.0(2)     | C6   | C2   | C1   | S03  | -175.32(12) |
| C14  | N2   | C4   | C5   | 170.10(15)  | C6   | C2   | C1   | N1   | 2.9(3)      |
| C14  | C19  | C18  | C17  | 0.1(2)      | C6   | C2   | C3   | S01  | 179.12(12)  |
| C14  | C15  | C16  | C17  | 0.5(3)      | C6   | C2   | C3   | N2   | -2.7(2)     |
| C00G | N1   | C1   | S03  | -5.3(2)     | C6   | C8   | C13  | C12  | 177.96(14)  |
| C00G | N1   | C1   | C2   | 176.63(15)  | C6   | C8   | C9   | C11  | 0.0(2)      |
| C00G | C00T | C00Y | C010 | -1.6(3)     | C6   | C8   | C9   | C10  | -178.74(15) |
| C00G | C00W | C00Z | C010 | 0.2(3)      | C6   | C5   | C4   | N2   | 8.0(2)      |
| C13  | C8   | C6   | C2   | 63.39(18)   | C6   | C5   | C4   | N3   | -174.09(15) |
| C13  | C8   | C6   | C5   | -59.05(18)  | C6   | C5   | C7   | O1   | 170.78(16)  |
| C13  | C8   | C9   | C11  | 178.88(11)  | C6   | C5   | C7   | N4   | -8.4(3)     |
| C13  | C8   | C9   | C10  | 0.2(2)      | C7   | C5   | C4   | N2   | -175.74(15) |
| C13  | C12  | C11  | C12  | -179.42(12) | C7   | C5   | C4   | N3   | 2.1(3)      |
| C13  | C12  | C11  | C10  | 0.1(3)      | C7   | C5   | C6   | C2   | 160.31(15)  |
| C1   | N1   | C00G | C00T | 122.10(18)  | C7   | C5   | C6   | C8   | -77.33(18)  |
| C1   | N1   | C00G | C00W | -61.1(2)    | C11  | C10  | C9   | C11  | -178.04(13) |
| C1   | C2   | C3   | S01  | 0.3(2)      | C11  | C10  | C9   | C8   | 0.7(2)      |
| C1   | C2   | C3   | N2   | 178.48(14)  | C18  | C17  | C16  | C15  | 0.0(3)      |
| C1   | C2   | C6   | C8   | 76.26(18)   | C00T | C00G | C00W | C00Z | -2.1(3)     |
| C1   | C2   | C6   | C5   | -160.51(14) | C00T | C00Y | C010 | C00Z | -0.3(3)     |
| C3   | N2   | C14  | C19  | 74.22(19)   | C9   | C8   | C13  | C12  | -1.0(2)     |
| C3   | N2   | C14  | C15  | -100.40(18) | C9   | C8   | C6   | C2   | -117.72(16) |
| C3   | N2   | C4   | N3   | -165.78(14) | C9   | C8   | C6   | C5   | 119.84(16)  |
| C3   | N2   | C4   | C5   | 12.3(2)     | C9   | C10  | C11  | C12  | 178.65(12)  |
| C3   | C2   | C1   | S03  | 3.44(19)    | C9   | C10  | C11  | C12  | -0.9(3)     |
| C3   | C2   | C1   | N1   | -178.30(16) | C00W | C00G | C00T | C00Y | 2.8(2)      |
| C3   | C2   | C6   | C8   | -102.46(17) | C00W | C00Z | C010 | C00Y | 1.0(3)      |
| C3   | C2   | C6   | C5   | 20.8(2)     |      |      |      |      |             |

**Table S10. Hydrogen Atom Coordinates ( $\text{\AA}\times 10^4$ ) and Isotropic Displacement Parameters ( $\text{\AA}^2\times 10^3$ ) for compound 3d.**

| Atom | <i>x</i> | <i>y</i> | <i>z</i> | U(eq) |
|------|----------|----------|----------|-------|
| H13  | 4582.75  | 8286.41  | 3869.86  | 18    |
| H19  | 1141.35  | 5703.06  | 3444.09  | 20    |
| H15  | 1725.6   | 8702.67  | 3666.81  | 22    |
| H12  | 5638.57  | 9718.98  | 4031.07  | 21    |
| H6   | 5503.94  | 5675.53  | 3790.55  | 15    |
| H10  | 8392.6   | 7927.14  | 4079.31  | 23    |
| H18  | -658.76  | 6111.71  | 3232.3   | 24    |
| H00T | 7923.51  | 6727.41  | 2753.05  | 23    |
| H17  | -1253.91 | 7812.5   | 3233.39  | 24    |
| H00W | 5577.7   | 4616.94  | 2481.74  | 24    |
| H16  | -69.18   | 9107.3   | 3449.34  | 26    |
| H00Y | 8778.94  | 6435.23  | 2163.51  | 29    |
| H00Z | 6466.29  | 4307.76  | 1896.96  | 30    |
| H010 | 8048.07  | 5229.78  | 1736.35  | 32    |
| H3A  | 1630(20) | 6882(18) | 4263(7)  | 22(6) |
| H4A  | 5930(20) | 5200(20) | 4331(8)  | 34(7) |
| H3B  | 2480(20) | 6341(19) | 4533(8)  | 29(6) |
| H4B  | 5660(30) | 4960(20) | 4742(9)  | 53(8) |

**Table S11. Solvent masks information for compound 3d.**

| Number | X      | Y     | Z     | Volume | Electron count |
|--------|--------|-------|-------|--------|----------------|
| 1      | -0.686 | 0.000 | 0.500 | 502.6  | 176.1          |
| 2      | -0.853 | 0.500 | 0.000 | 502.6  | 176.1          |

**Experimental**

Single crystals of C<sub>25</sub>H<sub>18</sub>Cl<sub>2</sub>N<sub>4</sub>OS<sub>2</sub> (compound **3d**) were prepared by slow evaporation of saturated solution in DMSO. A suitable crystal was selected and mounted on the glass stick by acrylic glue on a SuperNova, Dual, Cu at home/near, AtlasS2 diffractometer. The crystal was kept at 100.00(10) K during data collection. Using Olex2 [1], the structure was solved with the SHELXT [2] structure solution program using Intrinsic Phasing and refined with the SHELXL [3] refinement package using Least Squares minimisation.

1. Dolomanov, O.V., Bourhis, L.J., Gildea, R.J, Howard, J.A.K. & Puschmann, H. (2009), J. Appl. Cryst. 42, 339-341.
2. Sheldrick, G.M. (2015). Acta Cryst. A71, 3-8.
3. Sheldrick, G.M. (2015). Acta Cryst. C71, 3-8.

**Crystal structure determination details for compound 3d.**

**Crystal Data** for C<sub>25</sub>H<sub>18</sub>Cl<sub>2</sub>N<sub>4</sub>OS<sub>2</sub> (*M* = 525.45 g/mol): monoclinic, space group I2/a (no. 15), *a* = 11.97350(10) Å, *b* = 12.96920(10) Å, *c* = 34.4739(2) Å,  $\beta$  = 90.7890(10)°, *V* = 5352.83(7) Å<sup>3</sup>, *Z* = 8, *T* = 100.00(10) K,  $\mu$ (Cu K $\alpha$ ) = 3.837 mm<sup>-1</sup>, *D*<sub>calc</sub> = 1.304 g/cm<sup>3</sup>, 29542 reflections measured (7.282° ≤ 2 $\theta$  ≤ 153.23°), 5572 unique (*R*<sub>int</sub> = 0.0263, *R*<sub>sigma</sub> = 0.0158) which were used in all calculations. The final *R*<sub>1</sub> was 0.0352 (*I* > 2 $\sigma$ (*I*)) and *wR*<sub>2</sub> was 0.0939 (all data).

**Refinement model description**

Number of restraints - 0, number of constraints - unknown.

Details:

1. Fixed Uiso

At 1.2 times of:

All C(H) groups

2.a Ternary CH refined with riding coordinates:

C6(H6)

2.b Aromatic/amide H refined with riding coordinates:

C13(H13), C19(H19), C15(H15), C12(H12), C10(H10), C18(H18), C00T(H00T), C17(H17), C00W(H00W), C16(H16), C00Y(H00Y), C00Z(H00Z), C010(H010)



Figure S17. HRMS data for compound 3a

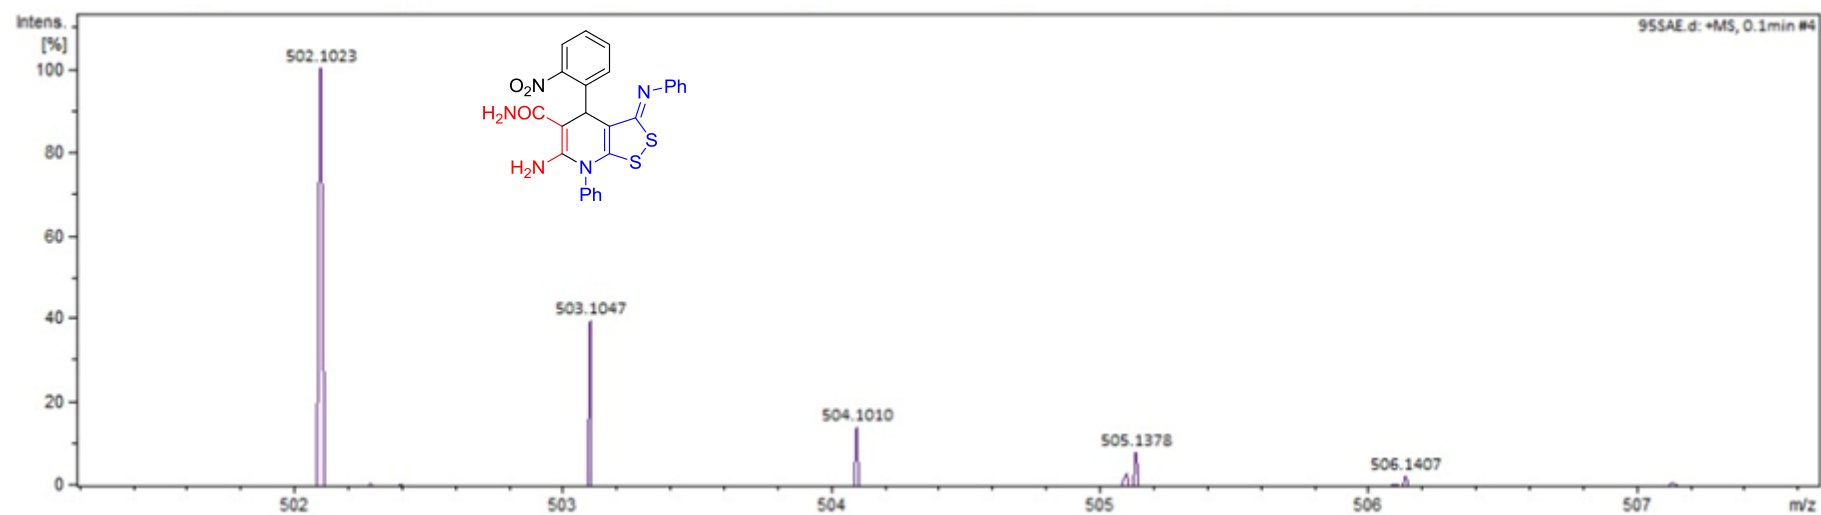

Figure S18. HRMS data for compound 3b

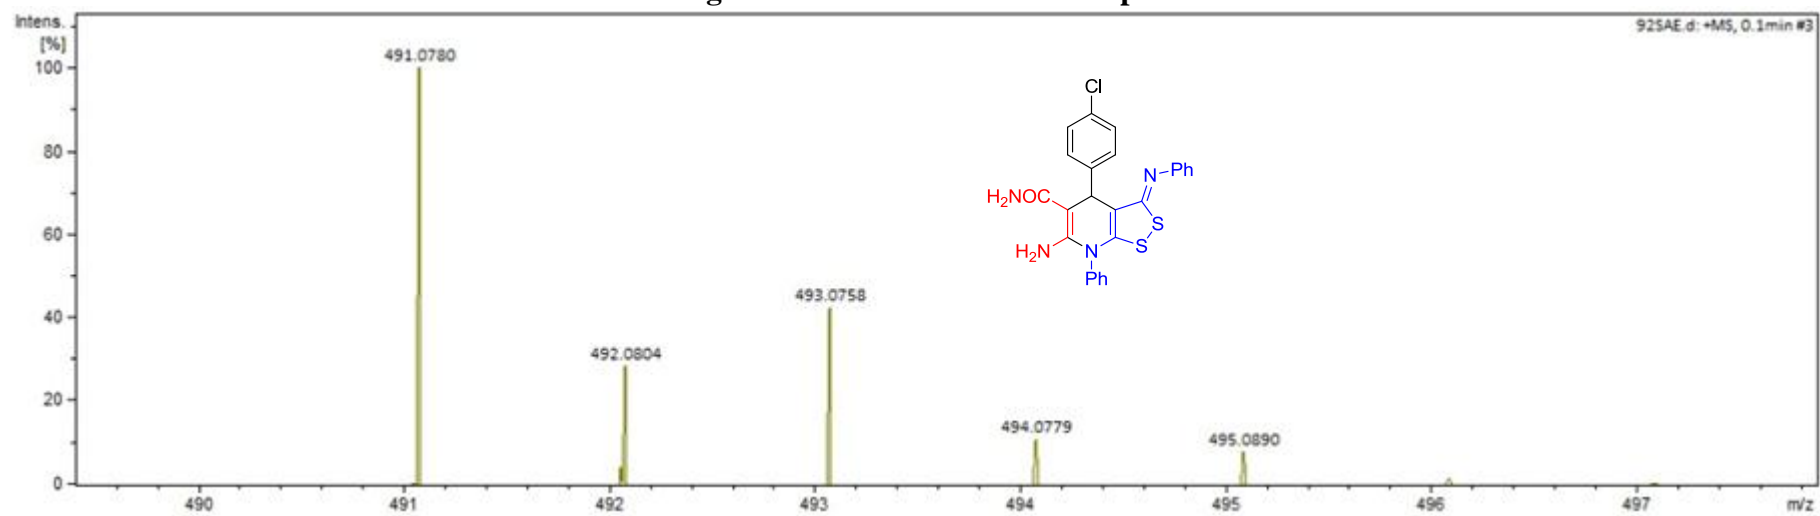

Figure S19. HRMS data for compound 3c

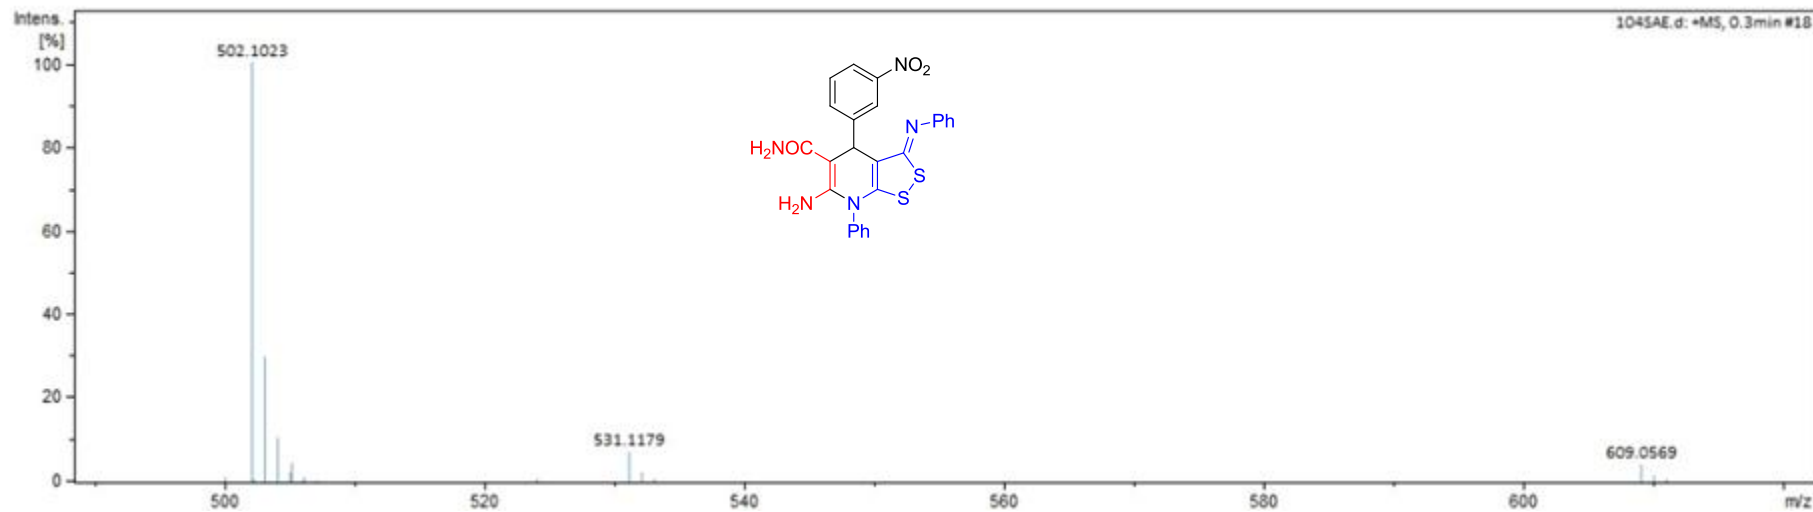

Figure S20. HRMS data for compound 3d

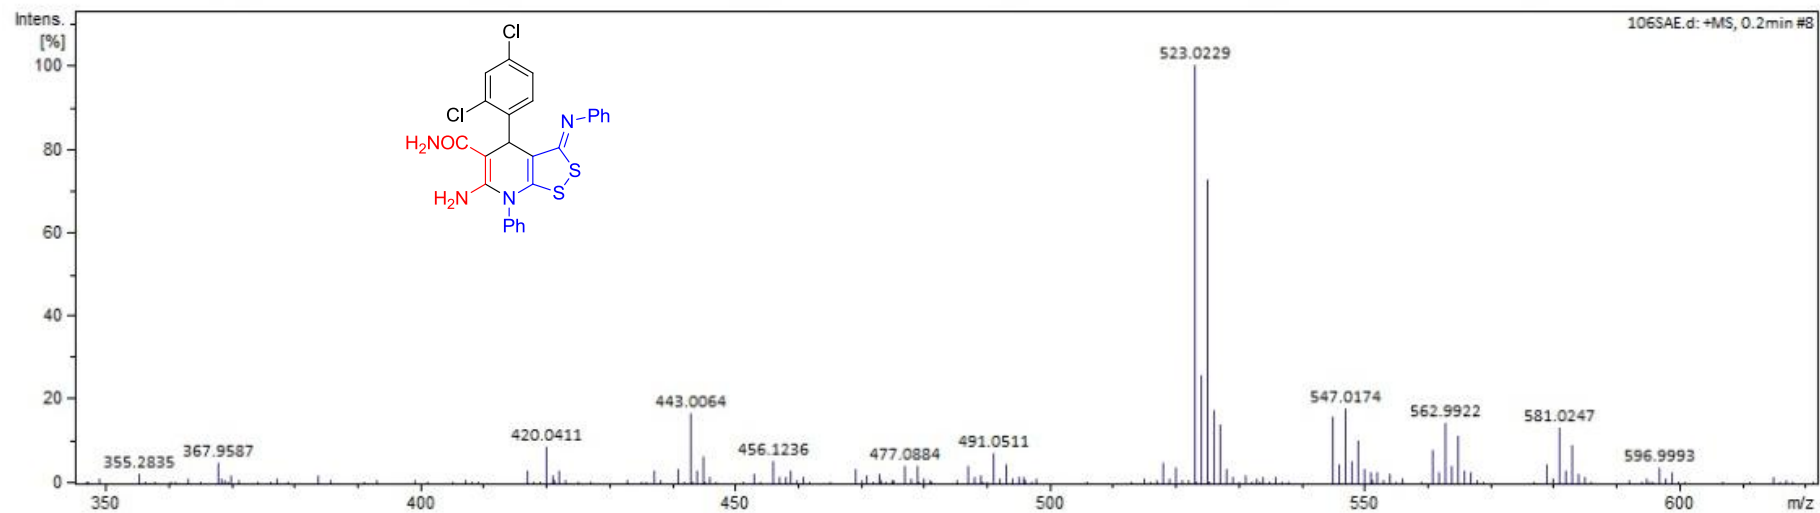

**Figure S21. HRMS data for the crude mixture from the experiment (3) - reaction of 3-(4-methoxyphenyl)-2-cyanoacrylamide **2f** with dithiomalondianilide **1** taken in the ratio 2 : 1;**

Here we can see the peak of 3-(4-methoxyphenyl)-2-cyanoacrylamide **2f**  $[M+Na]^+$ , calc. 225.063998, peaks of **3f**  $[M+Na]^+$ , calc. 508.100365

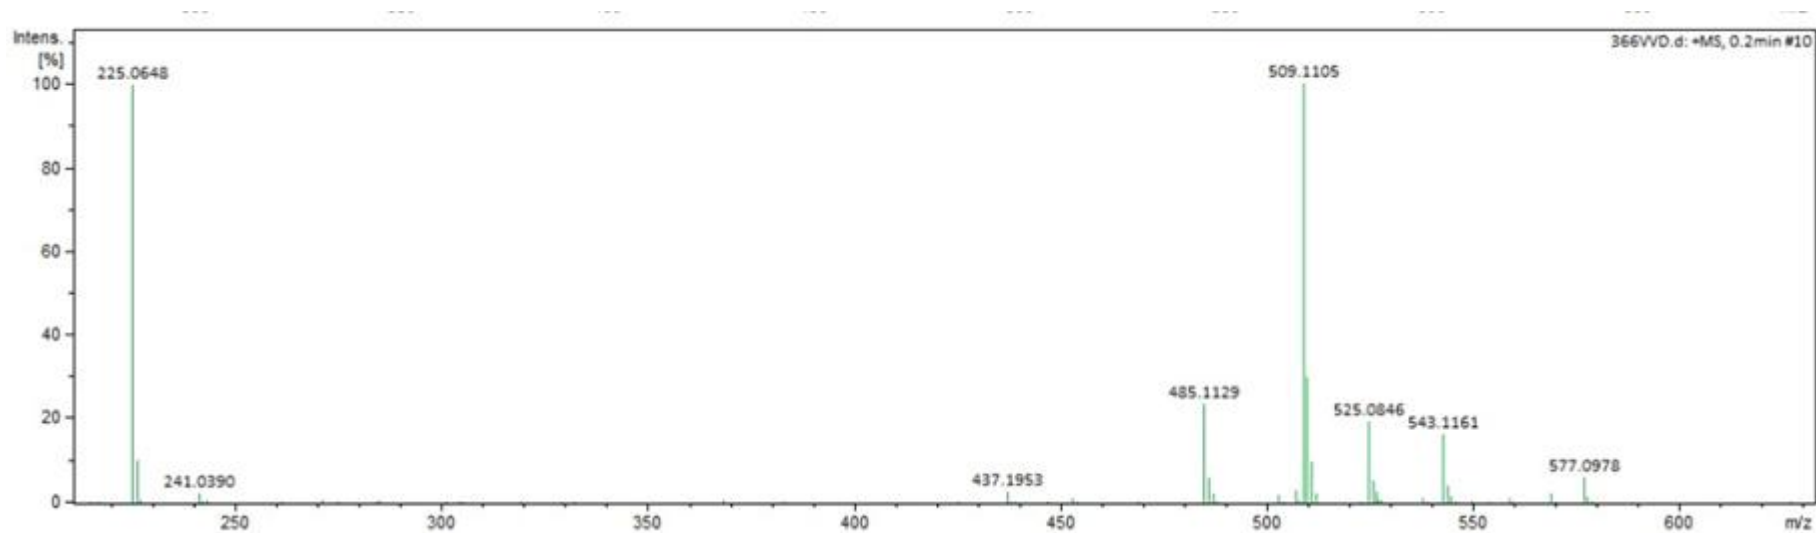

**Figure S22. HRMS of pure dithiolopyridine **3f** (experiment (2), Table 1, entry 6).**

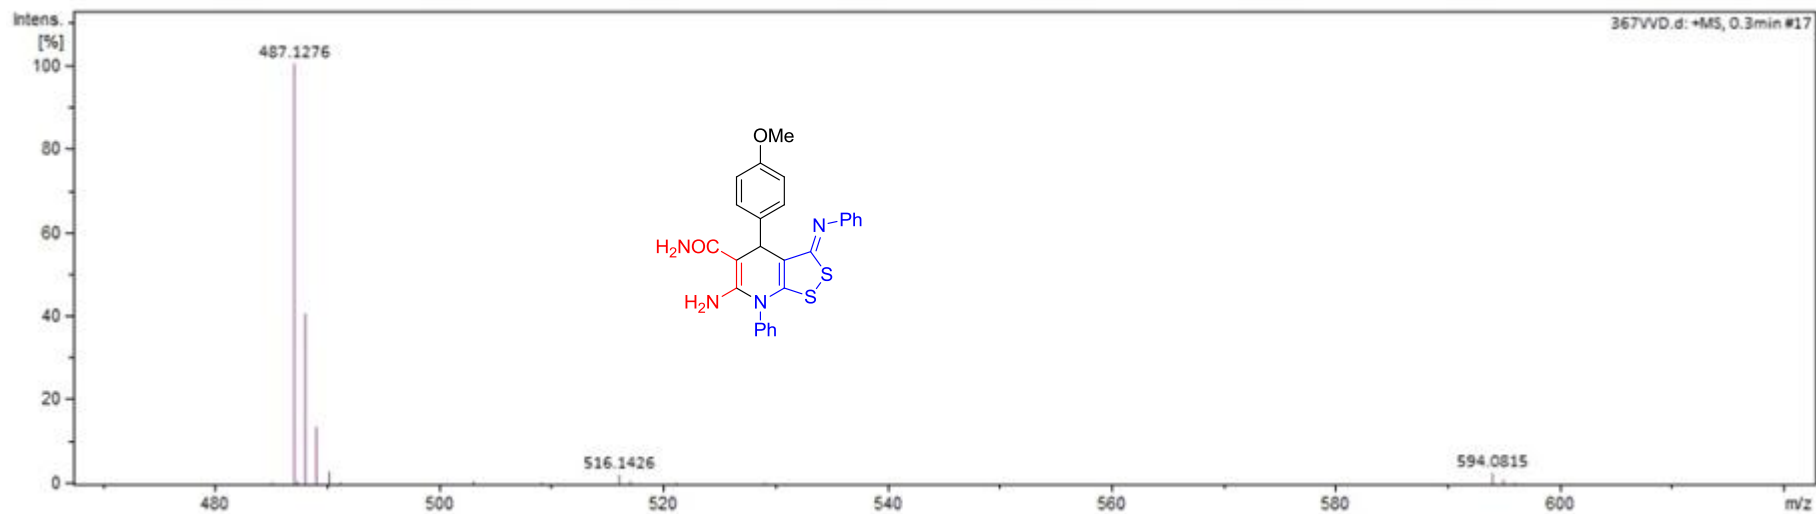

**Table S12. Toxicity risks and physicochemical parameters of compounds 3a-f predicted using OSIRIS Property Explorer**

| Compound                                                                                      | Toxicity risk* |   |   |   | Physico-chemical parameters |             |     |       |               |            |
|-----------------------------------------------------------------------------------------------|----------------|---|---|---|-----------------------------|-------------|-----|-------|---------------|------------|
|                                                                                               | A              | B | C | D | <i>cLogP</i>                | <i>logS</i> | MW  | TPSA  | Drug likeness | Drug Score |
| 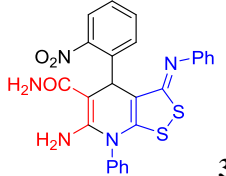 <b>3a</b>   | —              | — | — | — | 3.65                        | -7.19       | 501 | 181.1 | -3.29         | 0.19       |
|  <b>3b</b>   | —              | — | — | — | 5.18                        | -7.46       | 490 | 135.3 | 5.41          | 0.3        |
|  <b>3c</b>  | —              | — | — | — | 3.65                        | -7.19       | 501 | 181.1 | -1.32         | 0.22       |
|  <b>3d</b> | —              | — | — | — | 5.79                        | -8.2        | 524 | 135.3 | 5.22          | 0.24       |

|                                                                                                    |   |   |   |   |      |       |     |       |      |      |
|----------------------------------------------------------------------------------------------------|---|---|---|---|------|-------|-----|-------|------|------|
|  <p><b>3e</b></p> | — | — | — | — | 4.43 | -6.76 | 516 | 153.7 | 5.86 | 0.34 |
|  <p><b>3f</b></p> | — | — | — | — | 4.5  | -6.75 | 486 | 144.5 | 4.29 | 0.36 |

\*(+) indicates high risk of toxicity, (±) moderate risk, (–) no toxicity predicted. A - Mutagenic, B - Tumorigenic, C - Irritant effects, D - Reproductive effects.

**Table S13. ADMET parameters calculated for compound 3a using SwissADME and AdmetSar**

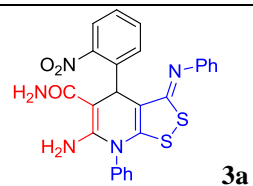

NC1=C(C(N)=O)C(C2=CC=CC=C2[N+])([O-])=O)C3=C(SS/C3=N\C4=CC=CC=C4)N1C5=CC=CC=C5

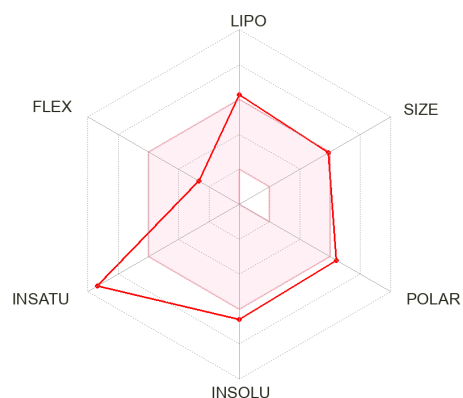

#### Physicochemical Properties

Formula C<sub>25</sub>H<sub>19</sub>CIN<sub>4</sub>OS<sub>2</sub>

Molecular weight 491.03 g/mol

Num. heavy atoms 33

Num. arom. heavy atoms 23

Fraction Csp<sup>3</sup> 0.04

Num. rotatable bonds 4

Num. H-bond acceptors 2

Num. H-bond donors 2

Molar Refractivity 138.34

TPSA 141.19 Å<sup>2</sup>

Lipophilicity

Log Po/w (iLOGP) 3.14

Log Po/w (XLOGP3) 5.49

Log Po/w (WLOGP) 5.25

Log Po/w (MLOGP) 3.45

Log Po/w (SILICOS-IT) 6.17  
 Consensus Log Po/w 4.70  
 Water Solubility  
 Log S (ESOL) -6.59  
 Solubility 1.25e-04 mg/ml ; 2.54e-07 mol/l  
 Class Poorly soluble  
 Log S (Ali) -8.21  
 Solubility 3.01e-06 mg/ml ; 6.12e-09 mol/l  
 Class Poorly soluble  
 Log S (SILICOS-IT) -8.54  
 Solubility 1.42e-06 mg/ml ; 2.88e-09 mol/l  
 Class Poorly soluble  
 Pharmacokinetics  
 GI absorption Low  
 BBB permeant No  
 P-gp substrate No  
 CYP1A2 inhibitor No  
 CYP2C19 inhibitor Yes  
 CYP2C9 inhibitor Yes  
 CYP2D6 inhibitor No  
 CYP3A4 inhibitor Yes  
 Log Kp (skin permeation) -5.40 cm/s  
 Druglikeness  
 Lipinski Yes; 0 violation  
 Ghose No; 2 violations: MW>480, MR>130  
 Veber No; 1 violation: TPSA>140  
 Egan No; 1 violation: TPSA>131.6  
 Muegge No; 1 violation: XLOGP3>5  
 Bioavailability Score 0.55  
 Medicinal Chemistry  
 PAINS 0 alert  
 Brenk 0 alert  
 Leadlikeness No; 2 violations: MW>350, XLOGP3>3.5  
 Synthetic accessibility 4.74

| ADMET predicted profile     | Value        | Probability |
|-----------------------------|--------------|-------------|
| Human Intestinal Absorption | +            | 0.9079      |
| Caco-2                      | -            | 0.5591      |
| Blood Brain Barrier         | +            | 0.6000      |
| Human oral bioavailability  | +            | 0.6857      |
| Subcellular localization    | Mitochondria | 0.5405      |

|                                             |        |        |
|---------------------------------------------|--------|--------|
| OATP2B1 inhibitor                           | -      | 0.7131 |
| OATP1B1 inhibitor                           | +      | 0.8928 |
| OATP1B3 inhibitor                           | +      | 0.9368 |
| MATE1 inhibitor                             | -      | 0.9623 |
| OCT2 inhibitor                              | -      | 0.8750 |
| BSEP inhibitor                              | +      | 0.6455 |
| P-glycoprotein inhibitor                    | +      | 0.5850 |
| P-glycoprotein substrate                    | -      | 0.7113 |
| CYP3A4 substrate                            | +      | 0.5948 |
| CYP2C9 substrate                            | -      | 0.8063 |
| CYP2D6 substrate                            | -      | 0.8829 |
| CYP3A4 inhibition                           | +      | 0.8782 |
| CYP2C9 inhibition                           | +      | 0.5819 |
| CYP2C19 inhibition                          | +      | 0.6868 |
| CYP2D6 inhibition                           | -      | 0.7844 |
| CYP1A2 inhibition                           | +      | 0.5784 |
| CYP inhibitory promiscuity                  | +      | 0.9301 |
| UGT catelized                               | -      | 0.0000 |
| Carcinogenicity (binary)                    | -      | 0.6800 |
| Carcinogenicity (trinary)                   | Danger | 0.4377 |
| Eye corrosion                               | -      | 0.9769 |
| Eye irritation                              | -      | 0.9188 |
| Ames mutagenesis                            | +      | 0.6209 |
| Human Ether-a-go-go-Related Gene inhibition | -      | 0.6058 |
| Micronuclear                                | +      | 1.0000 |
| Hepatotoxicity                              | +      | 0.8000 |
| skin sensitisation                          | -      | 0.8303 |
| Respiratory toxicity                        | +      | 0.7778 |
| Reproductive toxicity                       | +      | 0.7667 |
| Mitochondrial toxicity                      | +      | 0.9000 |
| Nephrotoxicity                              | +      | 0.5337 |
| Acute Oral Toxicity (c)                     | III    | 0.6153 |
| Estrogen receptor binding                   | +      | 0.7667 |
| Androgen receptor binding                   | +      | 0.7434 |
| Thyroid receptor binding                    | +      | 0.5635 |
| Glucocorticoid receptor binding             | +      | 0.8118 |
| Aromatase binding                           | +      | 0.6500 |
| PPAR gamma                                  | +      | 0.6055 |



|                            |        |                 |
|----------------------------|--------|-----------------|
| Honey bee toxicity         | -      | 0.8944          |
| Biodegradation             | -      | 0.9250          |
| Crustacea aquatic toxicity | -      | 0.6700          |
| Fish aquatic toxicity      | +      | 0.9820          |
| Water solubility           | -3.442 | logS            |
| Plasma protein binding     | 1.157  | 100%            |
| Acute Oral Toxicity        | 2.881  | log(1/(mol/kg)) |
| Tetrahymena pyriformis     | 1.191  | pIGC50 (ug/L)   |

**Table S14. ADMET parameters calculated for compound 3b using SwissADME and AdmetSar**

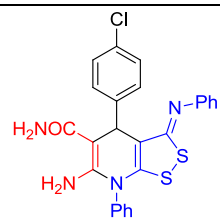

**3b**

NC1=C(C(N)=O)C(C2=CC=C(Cl)C=C2)C3=C(SS/C3=N\C4=CC=CC=C4)N1C5=CC=CC=C5

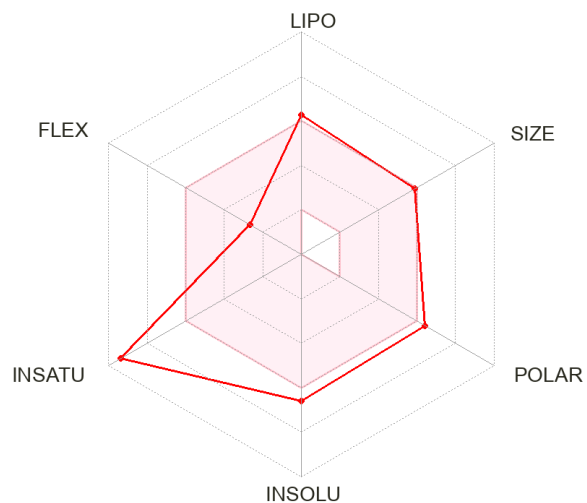

**Physicochemical Properties**

Formula C<sub>25</sub>H<sub>19</sub>ClN<sub>4</sub>OS<sub>2</sub>

Molecular weight 491.03 g/mol

Num. heavy atoms 33

Num. arom. heavy atoms 23

Fraction Csp<sup>3</sup> 0.04

Num. rotatable bonds 4

Num. H-bond acceptors 2

Num. H-bond donors 2

Molar Refractivity 138.34

TPSA 141.19 Å<sup>2</sup>  
 Lipophilicity  
 Log Po/w (iLOGP) 3.14  
 Log Po/w (XLOGP3) 5.49  
 Log Po/w (WLOGP) 5.25  
 Log Po/w (MLOGP) 3.45  
 Log Po/w (SILICOS-IT) 6.17  
 Consensus Log Po/w 4.70  
 Water Solubility  
 Log S (ESOL) -6.59  
 Solubility 1.25e-04 mg/ml ; 2.54e-07 mol/l  
 Class Poorly soluble  
 Log S (Ali) -8.21  
 Solubility 3.01e-06 mg/ml ; 6.12e-09 mol/l  
 Class Poorly soluble  
 Log S (SILICOS-IT) -8.54  
 Solubility 1.42e-06 mg/ml ; 2.88e-09 mol/l  
 Class Poorly soluble  
 Pharmacokinetics  
 GI absorption Low  
 BBB permeant No  
 P-gp substrate No  
 CYP1A2 inhibitor No  
 CYP2C19 inhibitor Yes  
 CYP2C9 inhibitor Yes  
 CYP2D6 inhibitor No  
 CYP3A4 inhibitor Yes  
 Log Kp (skin permeation) -5.40 cm/s  
 Druglikeness  
 Lipinski Yes; 0 violation  
 Ghose No; 2 violations: MW>480, MR>130  
 Veber No; 1 violation: TPSA>140  
 Egan No; 1 violation: TPSA>131.6  
 Muegge No; 1 violation: XLOGP3>5  
 Bioavailability Score 0.55  
 Medicinal Chemistry  
 PAINS 0 alert  
 Brenk 0 alert  
 Leadlikeness No; 2 violations: MW>350, XLOGP3>3.5  
 Synthetic accessibility 4.74

| ADMET predicted profile                     | Value        | Probability |
|---------------------------------------------|--------------|-------------|
| Human Intestinal Absorption                 | +            | 0.9699      |
| Caco-2                                      | -            | 0.6350      |
| Blood Brain Barrier                         | +            | 0.8250      |
| Human oral bioavailability                  | -            | 0.5000      |
| Subcellular localization                    | Lysosomes    | 0.6760      |
| OATP2B1 inhibitor                           | -            | 0.7128      |
| OATP1B1 inhibitor                           | +            | 0.9030      |
| OATP1B3 inhibitor                           | +            | 0.9377      |
| MATE1 inhibitor                             | -            | 0.9823      |
| OCT2 inhibitor                              | -            | 0.7250      |
| BSEP inhibitor                              | +            | 0.9473      |
| P-glycoprotein inhibitor                    | +            | 0.6827      |
| P-glycoprotein substrate                    | -            | 0.8936      |
| CYP3A4 substrate                            | +            | 0.5761      |
| CYP2C9 substrate                            | +            | 0.6000      |
| CYP2D6 substrate                            | -            | 0.8859      |
| CYP3A4 inhibition                           | +            | 0.6438      |
| CYP2C9 inhibition                           | +            | 0.6632      |
| CYP2C19 inhibition                          | +            | 0.8129      |
| CYP2D6 inhibition                           | -            | 0.8238      |
| CYP1A2 inhibition                           | +            | 0.6461      |
| CYP inhibitory promiscuity                  | +            | 0.9560      |
| UGT catalyzed                               | -            | 0.0000      |
| Carcinogenicity (binary)                    | -            | 0.7119      |
| Carcinogenicity (trinary)                   | Non-required | 0.5554      |
| Eye corrosion                               | -            | 0.9794      |
| Eye irritation                              | -            | 0.9813      |
| Ames mutagenesis                            | -            | 0.5454      |
| Human Ether-a-go-go-Related Gene inhibition | -            | 0.4305      |
| Micronuclear                                | +            | 0.9100      |
| Hepatotoxicity                              | +            | 0.6375      |
| skin sensitisation                          | -            | 0.8416      |
| Respiratory toxicity                        | +            | 0.8111      |
| Reproductive toxicity                       | +            | 0.8111      |
| Mitochondrial toxicity                      | +            | 0.8625      |
| Nephrotoxicity                              | +            | 0.4594      |
| Acute Oral Toxicity (c)                     | III          | 0.5895      |
| Estrogen receptor binding                   | +            | 0.7714      |
| Androgen receptor binding                   | +            | 0.7495      |
| Thyroid receptor binding                    | +            | 0.6576      |

|                                 |        |                 |
|---------------------------------|--------|-----------------|
| Glucocorticoid receptor binding | +      | 0.8577          |
| Aromatase binding               | +      | 0.6429          |
| PPAR gamma                      | +      | 0.6563          |
| Honey bee toxicity              | -      | 0.8830          |
| Biodegradation                  | -      | 0.8500          |
| Crustacea aquatic toxicity      | -      | 0.5200          |
| Fish aquatic toxicity           | +      | 0.9874          |
| Water solubility                | -3.891 | logS            |
| Plasma protein binding          | 1.178  | 100%            |
| Acute Oral Toxicity             | 2.027  | log(1/(mol/kg)) |
| Tetrahymena pyriformis          | 1.787  | pIGC50 (ug/L)   |

**Table S15. ADMET parameters calculated for compound 3c using SwissADME and AdmetSar**

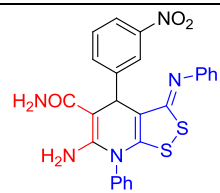

NC1=C(C(N)=O)C(C2=CC([N+])([O-])=O)=CC=C2)C3=C(SS/C3=N\C4=CC=CC=C4)N1C5=CC=CC=C5

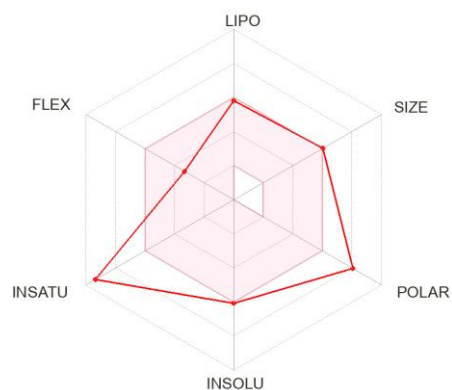

Formula C<sub>25</sub>H<sub>19</sub>N<sub>5</sub>O<sub>3</sub>S<sub>2</sub>

Molecular weight 501.58 g/mol

Num. heavy atoms 35

Num. arom. heavy atoms 23

Fraction Csp<sup>3</sup> 0.04

Num. rotatable bonds 5

Num. H-bond acceptors 4

Num. H-bond donors 2

Molar Refractivity 142.16

TPSA 187.01 Å<sup>2</sup>

Lipophilicity

Log Po/w (iLOGP) 2.77

Log Po/w (XLOGP3) 4.69

Log Po/w (WLOGP) 4.51

Log Po/w (MLOGP) 2.06

Log Po/w (SILICOS-IT) 3.37  
 Consensus Log Po/w 3.48  
 Water Solubility  
 Log S (ESOL) -6.06  
 Solubility 4.36e-04 mg/ml ; 8.69e-07 mol/l  
 Class Poorly soluble  
 Log S (Ali) -8.35  
 Solubility 2.27e-06 mg/ml ; 4.52e-09 mol/l  
 Class Poorly soluble  
 Log S (SILICOS-IT) -7.29  
 Solubility 2.56e-05 mg/ml ; 5.11e-08 mol/l  
 Class Poorly soluble  
 Pharmacokinetics  
 GI absorption Low  
 BBB permeant No  
 P-gp substrate No  
 CYP1A2 inhibitor No  
 CYP2C19 inhibitor Yes  
 CYP2C9 inhibitor Yes  
 CYP2D6 inhibitor No  
 CYP3A4 inhibitor Yes  
 Log Kp (skin permeation) -6.03 cm/s  
 Druglikeness  
 Lipinski Yes; 1 violation: MW>500  
 Ghose No; 2 violations: MW>480, MR>130  
 Veber No; 1 violation: TPSA>140  
 Egan No; 1 violation: TPSA>131.6  
 Muegge No; 1 violation: TPSA>150  
 Bioavailability Score 0.55  
 Medicinal Chemistry  
 PAINS 0 alert  
 Brenk 2 alerts: nitro\_group, oxygen-nitrogen\_single\_bond  
 Leadlikeness No; 2 violations: MW>350, XLOGP3>3.5  
 Synthetic accessibility 4.85

| ADMET predicted profile     | Value        | Probability |
|-----------------------------|--------------|-------------|
| Human Intestinal Absorption | +            | 0.9079      |
| Caco-2                      | -            | 0.6981      |
| Blood Brain Barrier         | +            | 0.6000      |
| Human oral bioavailability  | -            | 0.5143      |
| Subcellular localization    | Mitochondria | 0.5405      |

|                                             |        |        |
|---------------------------------------------|--------|--------|
| OATP2B1 inhibitor                           | -      | 0.7151 |
| OATP1B1 inhibitor                           | +      | 0.8918 |
| OATP1B3 inhibitor                           | +      | 0.9368 |
| MATE1 inhibitor                             | -      | 0.9623 |
| OCT2 inhibitor                              | -      | 0.8750 |
| BSEP inhibitor                              | +      | 0.7898 |
| P-glycoprotein inhibitor                    | +      | 0.6185 |
| P-glycoprotein substrate                    | -      | 0.6669 |
| CYP3A4 substrate                            | +      | 0.6186 |
| CYP2C9 substrate                            | -      | 0.8063 |
| CYP2D6 substrate                            | -      | 0.8829 |
| CYP3A4 inhibition                           | +      | 0.8782 |
| CYP2C9 inhibition                           | +      | 0.5819 |
| CYP2C19 inhibition                          | +      | 0.6868 |
| CYP2D6 inhibition                           | -      | 0.7844 |
| CYP1A2 inhibition                           | +      | 0.5784 |
| CYP inhibitory promiscuity                  | +      | 0.9301 |
| UGT catelized                               | -      | 0.0000 |
| Carcinogenicity (binary)                    | -      | 0.6800 |
| Carcinogenicity (trinary)                   | Danger | 0.4377 |
| Eye corrosion                               | -      | 0.9769 |
| Eye irritation                              | -      | 0.9467 |
| Ames mutagenesis                            | +      | 0.7009 |
| Human Ether-a-go-go-Related Gene inhibition | -      | 0.5000 |
| Micronuclear                                | +      | 1.0000 |
| Hepatotoxicity                              | +      | 0.7875 |
| skin sensitisation                          | -      | 0.8303 |
| Respiratory toxicity                        | +      | 0.7111 |
| Reproductive toxicity                       | +      | 0.7667 |
| Mitochondrial toxicity                      | +      | 0.9000 |
| Nephrotoxicity                              | -      | 0.6160 |
| Acute Oral Toxicity (c)                     | III    | 0.6153 |
| Estrogen receptor binding                   | +      | 0.8047 |
| Androgen receptor binding                   | +      | 0.7615 |
| Thyroid receptor binding                    | +      | 0.5894 |
| Glucocorticoid receptor binding             | +      | 0.8449 |
| Aromatase binding                           | +      | 0.5873 |
| PPAR gamma                                  | +      | 0.6930 |
| Honey bee toxicity                          | -      | 0.8937 |



|                            |        |                 |
|----------------------------|--------|-----------------|
| Biodegradation             | -      | 0.9000          |
| Crustacea aquatic toxicity | -      | 0.8300          |
| Fish aquatic toxicity      | +      | 0.9820          |
| Water solubility           | -3.442 | logS            |
| Plasma protein binding     | 1.244  | 100%            |
| Acute Oral Toxicity        | 2.587  | log(1/(mol/kg)) |
| Tetrahymena pyriformis     | 1.256  | pIGC50 (ug/L)   |

**Table S16. ADMET parameters calculated for compound 3d using SwissADME and AdmetSar**

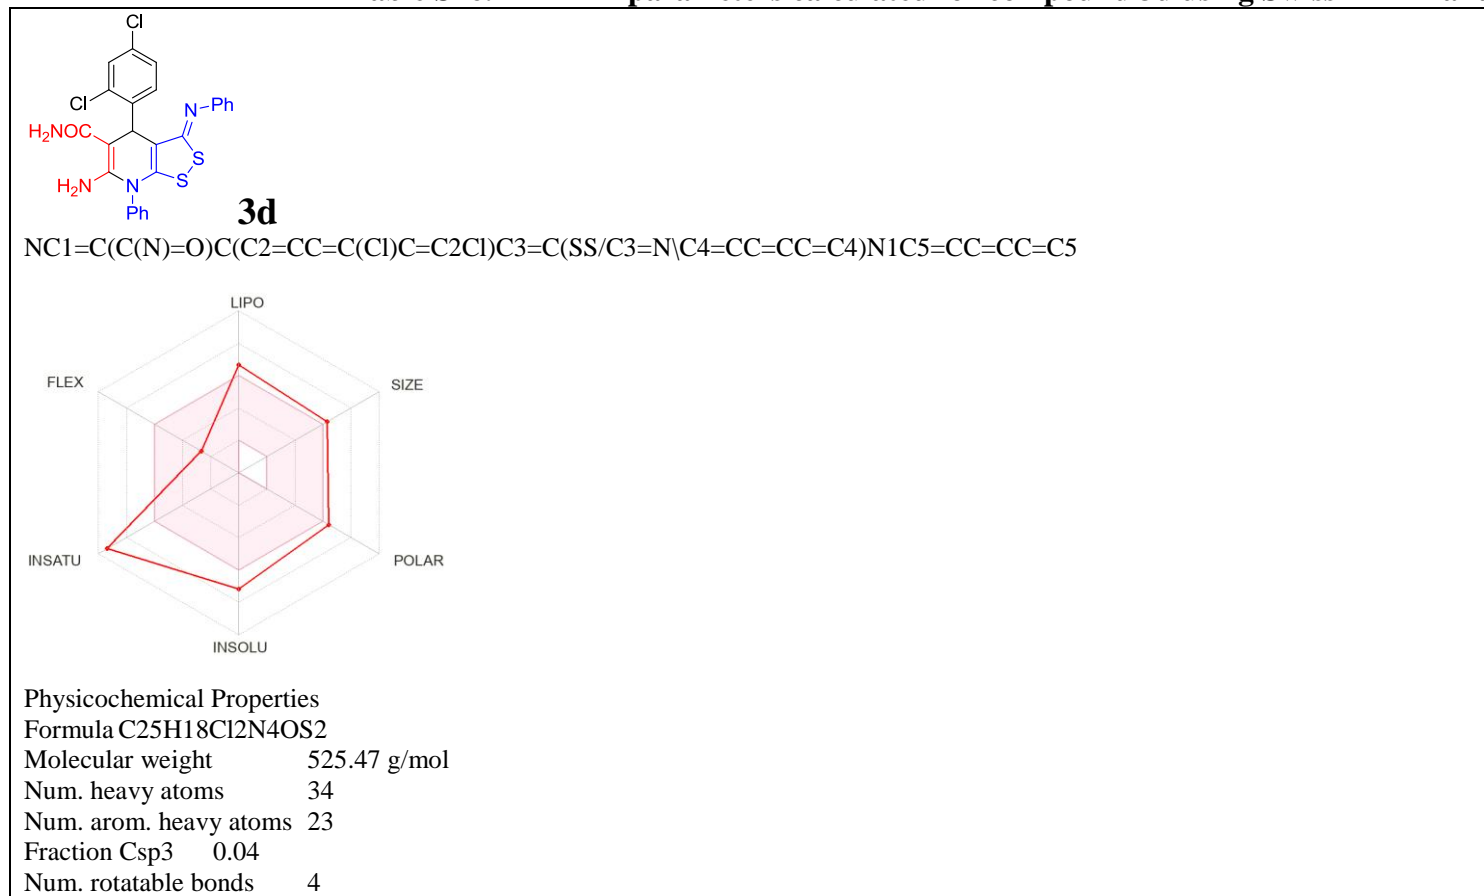

|                          |                                             |
|--------------------------|---------------------------------------------|
| Num. H-bond acceptors    | 2                                           |
| Num. H-bond donors       | 2                                           |
| Molar Refractivity       | 143.35                                      |
| TPSA                     | 141.19 Å <sup>2</sup>                       |
| Lipophilicity            |                                             |
| Log Po/w (iLOGP)         | 3.06                                        |
| Log Po/w (XLOGP3)        | 6.12                                        |
| Log Po/w (WLOGP)         | 5.91                                        |
| Log Po/w (MLOGP)         | 3.92                                        |
| Log Po/w (SILICOS-IT)    | 6.82                                        |
| Consensus Log Po/w       | 5.16                                        |
| Water Solubility         |                                             |
| Log S (ESOL)             | -7.19                                       |
| Solubility               | 3.39e-05 mg/ml ; 6.45e-08 mol/l             |
| Class                    | Poorly soluble                              |
| Log S (Ali)              | -8.87                                       |
| Solubility               | 7.14e-07 mg/ml ; 1.36e-09 mol/l             |
| Class                    | Poorly soluble                              |
| Log S (SILICOS-IT)       | -9.12                                       |
| Solubility               | 4.01e-07 mg/ml ; 7.64e-10 mol/l             |
| Class                    | Poorly soluble                              |
| Pharmacokinetics         |                                             |
| GI absorption            | Low                                         |
| BBB permeant             | No                                          |
| P-gp substrate           | No                                          |
| CYP1A2 inhibitor         | No                                          |
| CYP2C19 inhibitor        | Yes                                         |
| CYP2C9 inhibitor         | Yes                                         |
| CYP2D6 inhibitor         | No                                          |
| CYP3A4 inhibitor         | Yes                                         |
| Log Kp (skin permeation) | -5.16 cm/s                                  |
| Druglikeness             |                                             |
| Lipinski                 | Yes; 1 violation: MW>500                    |
| Ghose                    | No; 3 violations: MW>480, WLOGP>5.6, MR>130 |
| Veber                    | No; 1 violation: TPSA>140                   |
| Egan                     | No; 2 violations: WLOGP>5.88, TPSA>131.6    |
| Muegge                   | No; 1 violation: XLOGP3>5                   |
| Bioavailability Score    | 0.55                                        |
| Medicinal Chemistry      |                                             |
| PAINS                    | 0 alert                                     |

| Brenk 0 alert                                     |              |             |
|---------------------------------------------------|--------------|-------------|
| Leadlikeness No; 2 violations: MW>350, XLOGP3>3.5 |              |             |
| Synthetic accessibility 4.79                      |              |             |
| ADMET predicted profile                           | Value        | Probability |
| Human Intestinal Absorption                       | +            | 0.9699      |
| Caco-2                                            | -            | 0.6591      |
| Blood Brain Barrier                               | +            | 0.8250      |
| Human oral bioavailability                        | +            | 0.6571      |
| Subcellular localzation                           | Lysosomes    | 0.6760      |
| OATP2B1 inhibitor                                 | -            | 0.7128      |
| OATP1B1 inhibitor                                 | +            | 0.9163      |
| OATP1B3 inhibitor                                 | +            | 0.9377      |
| MATE1 inhibitor                                   | -            | 0.9823      |
| OCT2 inhibitor                                    | -            | 0.7250      |
| BSEP inhibitor                                    | +            | 0.9631      |
| P-glycoprotein inhibitor                          | +            | 0.6805      |
| P-glycoprotein substrate                          | -            | 0.7919      |
| CYP3A4 substrate                                  | +            | 0.6242      |
| CYP2C9 substrate                                  | +            | 0.6000      |
| CYP2D6 substrate                                  | -            | 0.8859      |
| CYP3A4 inhibition                                 | +            | 0.6438      |
| CYP2C9 inhibition                                 | +            | 0.6632      |
| CYP2C19 inhibition                                | +            | 0.8129      |
| CYP2D6 inhibition                                 | -            | 0.8238      |
| CYP1A2 inhibition                                 | +            | 0.6461      |
| CYP inhibitory promiscuity                        | +            | 0.9560      |
| UGT catelized                                     | -            | 0.0000      |
| Carcinogenicity (binary)                          | -            | 0.7119      |
| Carcinogenicity (trinary)                         | Non-required | 0.5554      |
| Eye corrosion                                     | -            | 0.9794      |
| Eye irritation                                    | -            | 0.9749      |
| Ames mutagenesis                                  | +            | 0.5046      |
| Human Ether-a-go-go-Related Gene inhibition       | -            | 0.5000      |
| Micronuclear                                      | +            | 0.9100      |
| Hepatotoxicity                                    | +            | 0.8000      |
| skin sensitisation                                | -            | 0.8416      |
| Respiratory toxicity                              | +            | 0.7667      |
| Reproductive toxicity                             | +            | 0.8111      |
| Mitochondrial toxicity                            | +            | 0.8625      |

|                                 |        |                 |
|---------------------------------|--------|-----------------|
| Nephrotoxicity                  | +      | 0.5694          |
| Acute Oral Toxicity (c)         | III    | 0.5895          |
| Estrogen receptor binding       | +      | 0.8165          |
| Androgen receptor binding       | +      | 0.7653          |
| Thyroid receptor binding        | +      | 0.7229          |
| Glucocorticoid receptor binding | +      | 0.8848          |
| Aromatase binding               | +      | 0.6064          |
| PPAR gamma                      | +      | 0.7571          |
| Honey bee toxicity              | -      | 0.8920          |
| Biodegradation                  | -      | 0.8500          |
| Crustacea aquatic toxicity      | -      | 0.5051          |
| Fish aquatic toxicity           | +      | 0.9874          |
| Water solubility                | -3.891 | logS            |
| Plasma protein binding          | 1.134  | 100%            |
| Acute Oral Toxicity             | 2.068  | log(1/(mol/kg)) |
| Tetrahymena pyriformis          | 1.736  | pIGC50 (ug/L)   |

**Table S17. ADMET parameters calculated for compound 3e using SwissADME and AdmetSar**

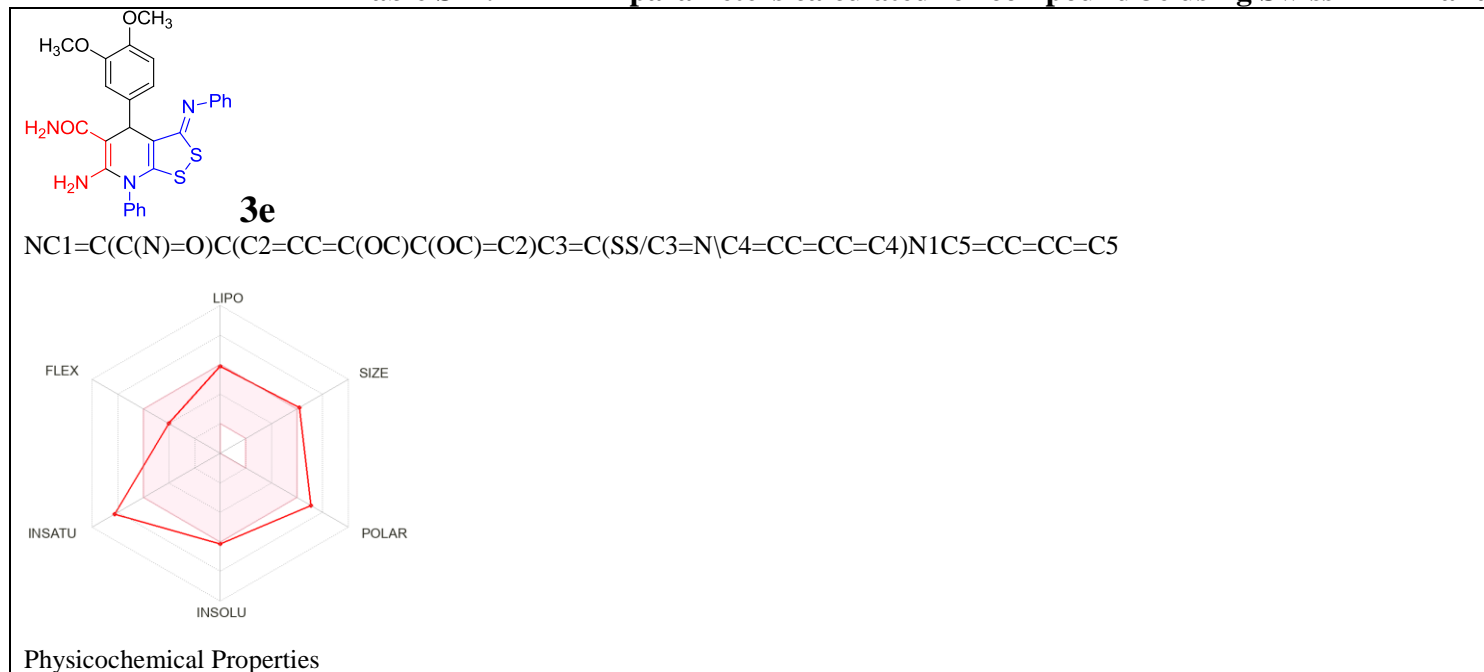

Formula C<sub>27</sub>H<sub>24</sub>N<sub>4</sub>O<sub>3</sub>S<sub>2</sub>  
 Molecular weight 516.63 g/mol  
 Num. heavy atoms 36  
 Num. arom. heavy atoms 23  
 Fraction Csp<sup>3</sup> 0.11  
 Num. rotatable bonds 6  
 Num. H-bond acceptors 4  
 Num. H-bond donors 2  
 Molar Refractivity 146.32  
 TPSA 159.65 Å<sup>2</sup>  
 Lipophilicity  
 Log Po/w (iLOGP) 3.69  
 Log Po/w (XLOGP3) 4.81  
 Log Po/w (WLOGP) 4.62  
 Log Po/w (MLOGP) 2.30  
 Log Po/w (SILICOS-IT) 5.67  
 Consensus Log Po/w 4.22  
 Water Solubility  
 Log S (ESOL) -6.15  
 Solubility 3.66e-04 mg/ml ; 7.08e-07 mol/l  
 Class Poorly soluble  
 Log S (Ali) -7.90  
 Solubility 6.58e-06 mg/ml ; 1.27e-08 mol/l  
 Class Poorly soluble  
 Log S (SILICOS-IT) -8.15  
 Solubility 3.65e-06 mg/ml ; 7.06e-09 mol/l  
 Class Poorly soluble  
 Pharmacokinetics  
 GI absorption Low  
 BBB permeant No  
 P-gp substrate No  
 CYP1A2 inhibitor No  
 CYP2C19 inhibitor Yes  
 CYP2C9 inhibitor Yes  
 CYP2D6 inhibitor No  
 CYP3A4 inhibitor Yes  
 Log K<sub>p</sub> (skin permeation) -6.04 cm/s  
 Druglikeness  
 Lipinski Yes; 1 violation: MW>500  
 Ghose No; 2 violations: MW>480, MR>130

| Veber No; 1 violation: TPSA>140<br>Egan No; 1 violation: TPSA>131.6<br>Muegge No; 1 violation: TPSA>150<br>Bioavailability Score 0.55<br>Medicinal Chemistry<br>PAINS 0 alert<br>Brenk 0 alert<br>Leadlikeness No; 2 violations: MW>350, XLOGP3>3.5<br>Synthetic accessibility 5.00 |              |             |
|-------------------------------------------------------------------------------------------------------------------------------------------------------------------------------------------------------------------------------------------------------------------------------------|--------------|-------------|
| ADMET predicted profile                                                                                                                                                                                                                                                             | Value        | Probability |
| Human Intestinal Absorption                                                                                                                                                                                                                                                         | +            | 0.9612      |
| Caco-2                                                                                                                                                                                                                                                                              | -            | 0.5433      |
| Blood Brain Barrier                                                                                                                                                                                                                                                                 | +            | 0.5500      |
| Human oral bioavailability                                                                                                                                                                                                                                                          | -            | 0.5000      |
| Subcellular localization                                                                                                                                                                                                                                                            | Mitochondria | 0.3736      |
| OATP2B1 inhibitor                                                                                                                                                                                                                                                                   | -            | 0.7117      |
| OATP1B1 inhibitor                                                                                                                                                                                                                                                                   | +            | 0.9128      |
| OATP1B3 inhibitor                                                                                                                                                                                                                                                                   | +            | 0.9359      |
| MATE1 inhibitor                                                                                                                                                                                                                                                                     | -            | 0.9423      |
| OCT2 inhibitor                                                                                                                                                                                                                                                                      | -            | 0.9000      |
| BSEP inhibitor                                                                                                                                                                                                                                                                      | +            | 0.9346      |
| P-glycoprotein inhibitor                                                                                                                                                                                                                                                            | +            | 0.9013      |
| P-glycoprotein substrate                                                                                                                                                                                                                                                            | -            | 0.6867      |
| CYP3A4 substrate                                                                                                                                                                                                                                                                    | +            | 0.5925      |
| CYP2C9 substrate                                                                                                                                                                                                                                                                    | -            | 0.7952      |
| CYP2D6 substrate                                                                                                                                                                                                                                                                    | -            | 0.8665      |
| CYP3A4 inhibition                                                                                                                                                                                                                                                                   | +            | 0.5202      |
| CYP2C9 inhibition                                                                                                                                                                                                                                                                   | +            | 0.6508      |
| CYP2C19 inhibition                                                                                                                                                                                                                                                                  | +            | 0.7677      |
| CYP2D6 inhibition                                                                                                                                                                                                                                                                   | -            | 0.8155      |
| CYP1A2 inhibition                                                                                                                                                                                                                                                                   | -            | 0.6840      |
| CYP inhibitory promiscuity                                                                                                                                                                                                                                                          | +            | 0.8506      |
| UGT catelized                                                                                                                                                                                                                                                                       | -            | 0.0000      |
| Carcinogenicity (binary)                                                                                                                                                                                                                                                            | -            | 0.8600      |
| Carcinogenicity (trinary)                                                                                                                                                                                                                                                           | Non-required | 0.4764      |
| Eye corrosion                                                                                                                                                                                                                                                                       | -            | 0.9816      |
| Eye irritation                                                                                                                                                                                                                                                                      | -            | 0.9617      |
| Ames mutagenesis                                                                                                                                                                                                                                                                    | +            | 0.5146      |
| Human Ether-a-go-go-Related Gene inhibition                                                                                                                                                                                                                                         | +            | 0.7191      |

|                                 |        |                 |
|---------------------------------|--------|-----------------|
| Micronuclear                    | +      | 0.9600          |
| Hepatotoxicity                  | -      | 0.5125          |
| skin sensitisation              | -      | 0.8429          |
| Respiratory toxicity            | +      | 0.7000          |
| Reproductive toxicity           | +      | 0.7889          |
| Mitochondrial toxicity          | +      | 0.8750          |
| Nephrotoxicity                  | -      | 0.7047          |
| Acute Oral Toxicity (c)         | III    | 0.5792          |
| Estrogen receptor binding       | +      | 0.8648          |
| Androgen receptor binding       | +      | 0.7423          |
| Thyroid receptor binding        | +      | 0.7647          |
| Glucocorticoid receptor binding | +      | 0.8746          |
| Aromatase binding               | -      | 0.5000          |
| PPAR gamma                      | +      | 0.7150          |
| Honey bee toxicity              | -      | 0.8936          |
| Biodegradation                  | -      | 0.9250          |
| Crustacea aquatic toxicity      | -      | 0.6600          |
| Fish aquatic toxicity           | +      | 0.9670          |
| Water solubility                | -3.438 | logS            |
| Plasma protein binding          | 1.077  | 100%            |
| Acute Oral Toxicity             | 2.045  | log(1/(mol/kg)) |
| Tetrahymena pyriformis          | 1.404  | pIGC50 (ug/L)   |

**Table S18. ADMET parameters calculated for compound 3f using SwissADME and AdmetSar**

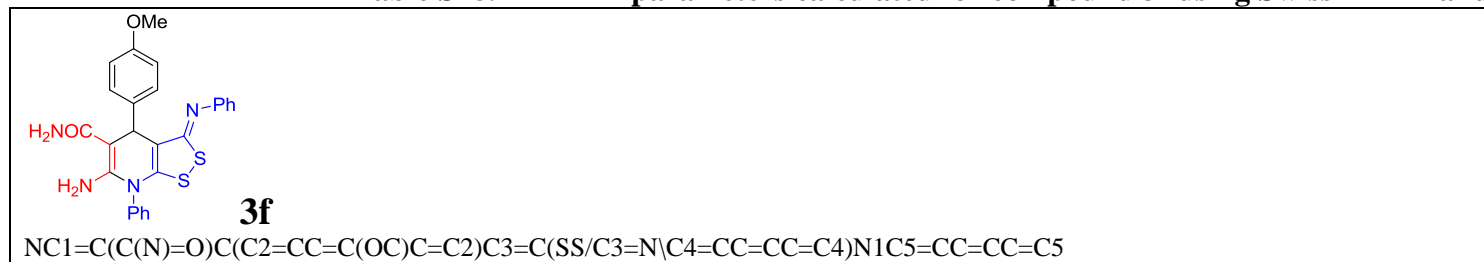

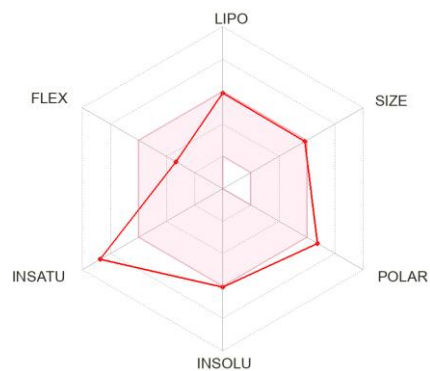

#### Physicochemical Properties

Formula C<sub>26</sub>H<sub>22</sub>N<sub>4</sub>O<sub>2</sub>S<sub>2</sub>

Molecular weight 486.61 g/mol

Num. heavy atoms 34

Num. arom. heavy atoms 23

Fraction Csp<sup>3</sup> 0.08

Num. rotatable bonds 5

Num. H-bond acceptors 3

Num. H-bond donors 2

Molar Refractivity 139.83

TPSA 150.42 Å<sup>2</sup>

#### Lipophilicity

Log Po/w (iLOGP) 3.60

Log Po/w (XLOGP3) 4.83

Log Po/w (WLOGP) 4.61

Log Po/w (MLOGP) 2.63

Log Po/w (SILICOS-IT) 5.60

Consensus Log Po/w 4.26

#### Water Solubility

Log S (ESOL) -6.07

Solubility 4.14e-04 mg/ml ; 8.50e-07 mol/l

Class Poorly soluble

Log S (Ali) -7.72

Solubility 9.23e-06 mg/ml ; 1.90e-08 mol/l

Class Poorly soluble

Log S (SILICOS-IT) -8.06

Solubility 4.27e-06 mg/ml ; 8.77e-09 mol/l



Class Poorly soluble  
 Pharmacokinetics  
 GI absorption Low  
 BBB permeant No  
 P-gp substrate No  
 CYP1A2 inhibitor No  
 CYP2C19 inhibitor Yes  
 CYP2C9 inhibitor Yes  
 CYP2D6 inhibitor No  
 CYP3A4 inhibitor Yes  
 Log Kp (skin permeation) -5.84 cm/s  
 Druglikeness  
 Lipinski Yes; 0 violation  
 Ghose No; 2 violations: MW>480, MR>130  
 Veber No; 1 violation: TPSA>140  
 Egan No; 1 violation: TPSA>131.6  
 Muegge No; 1 violation: TPSA>150  
 Bioavailability Score 0.55  
 Medicinal Chemistry  
 PAINS 0 alert  
 Brenk 0 alert  
 Leadlikeness No; 2 violations: MW>350, XLOGP3>3.5  
 Synthetic accessibility 4.84

| ADMET predicted profile     | Value     | Probability |
|-----------------------------|-----------|-------------|
| Human Intestinal Absorption | +         | 0.9786      |
| Caco-2                      | -         | 0.5455      |
| Blood Brain Barrier         | +         | 0.6750      |
| Human oral bioavailability  | -         | 0.6000      |
| Subcellular localization    | Lysosomes | 0.4007      |
| OATP2B1 inhibitor           | -         | 0.7108      |
| OATP1B1 inhibitor           | +         | 0.8985      |
| OATP1B3 inhibitor           | +         | 0.9369      |
| MATE1 inhibitor             | -         | 0.9423      |
| OCT2 inhibitor              | -         | 0.8000      |
| BSEP inhibitor              | +         | 0.9310      |
| P-glycoprotein inhibitor    | +         | 0.8414      |
| P-glycoprotein substrate    | -         | 0.8429      |
| CYP3A4 substrate            | +         | 0.5825      |
| CYP2C9 substrate            | -         | 0.7952      |
| CYP2D6 substrate            | -         | 0.8665      |

|                                             |              |                 |
|---------------------------------------------|--------------|-----------------|
| CYP3A4 inhibition                           | -            | 0.5564          |
| CYP2C9 inhibition                           | +            | 0.6211          |
| CYP2C19 inhibition                          | +            | 0.7777          |
| CYP2D6 inhibition                           | -            | 0.7906          |
| CYP1A2 inhibition                           | -            | 0.5000          |
| CYP inhibitory promiscuity                  | +            | 0.8677          |
| UGT catelized                               | -            | 0.0000          |
| Carcinogenicity (binary)                    | -            | 0.8700          |
| Carcinogenicity (trinary)                   | Non-required | 0.4908          |
| Eye corrosion                               | -            | 0.9818          |
| Eye irritation                              | -            | 0.9569          |
| Ames mutagenesis                            | +            | 0.5246          |
| Human Ether-a-go-go-Related Gene inhibition | +            | 0.6740          |
| Micronuclear                                | +            | 0.9500          |
| Hepatotoxicity                              | -            | 0.5594          |
| skin sensitisation                          | -            | 0.8413          |
| Respiratory toxicity                        | +            | 0.7111          |
| Reproductive toxicity                       | +            | 0.7444          |
| Mitochondrial toxicity                      | +            | 0.8875          |
| Nephrotoxicity                              | -            | 0.6658          |
| Acute Oral Toxicity (c)                     | III          | 0.5659          |
| Estrogen receptor binding                   | +            | 0.8366          |
| Androgen receptor binding                   | +            | 0.7831          |
| Thyroid receptor binding                    | +            | 0.7030          |
| Glucocorticoid receptor binding             | +            | 0.8841          |
| Aromatase binding                           | +            | 0.5494          |
| PPAR gamma                                  | +            | 0.6600          |
| Honey bee toxicity                          | -            | 0.9201          |
| Biodegradation                              | -            | 0.8500          |
| Crustacea aquatic toxicity                  | -            | 0.6000          |
| Fish aquatic toxicity                       | +            | 0.9527          |
| Water solubility                            | -3.538       | logS            |
| Plasma protein binding                      | 1.016        | 100%            |
| Acute Oral Toxicity                         | 2.252        | log(1/(mol/kg)) |
| Tetrahymena pyriformis                      | 1.371        | pIGC50 (ug/L)   |

**Table S19. Rat acute toxicity of 3a predicted by GUSAR**

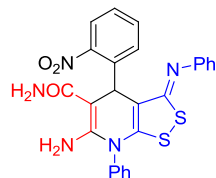

| Rat IP LD50 Log10(mmol/kg) | Rat IV LD50 log10(mmol/kg) | Rat Oral LD50 log10(mmol/kg) | Rat SC LD50 log10(mmol/kg) |
|----------------------------|----------------------------|------------------------------|----------------------------|
| -0,004 in AD               | -0,437 in AD               | 0,542 in AD                  | 0,212 in AD                |

| Rat IP LD50 (mg/kg) | Rat IV LD50 (mg/kg) | Rat Oral LD50 (mg/kg) | Rat SC LD50 (mg/kg) |
|---------------------|---------------------|-----------------------|---------------------|
| 497,200 in AD       | 183,400 in AD       | 1747,000 in AD        | 816,500 in AD       |

**Acute Rodent Toxicity Classification of Chemicals by OECD Project**

| Rat IP LD50 Classification | Rat IV LD50 Classification | Rat Oral LD50 Classification | Rat SC LD50 Classification |
|----------------------------|----------------------------|------------------------------|----------------------------|
| Class 4 in AD              | Class 4 in AD              | Class 4 in AD                | Class 4 in AD              |

IP - Intraperitoneal route of administration

IV - Intravenous route of administration

Oral - Oral route of administration

SC - Subcutaneous route of administration

in AD - compound falls in applicability domain of models

out of AD - compound is out of applicability domain of models

**Table S20. Rat acute toxicity of 3b predicted by GUSAR**

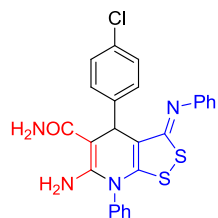

| Rat IP LD50 Log10(mmol/kg) | Rat IV LD50 log10(mmol/kg) | Rat Oral LD50 log10(mmol/kg) | Rat SC LD50 log10(mmol/kg) |
|----------------------------|----------------------------|------------------------------|----------------------------|
| 0,077 in AD                | -0,442 in AD               | 0,499 in AD                  | 0,583 out of AD            |

| Rat IP LD50 (mg/kg) | Rat IV LD50 (mg/kg) | Rat Oral LD50 (mg/kg) | Rat SC LD50 (mg/kg) |
|---------------------|---------------------|-----------------------|---------------------|
| 586,000 in AD       | 177,500 in AD       | 1548,000 in AD        | 1881,000 out of AD  |

#### Acute Rodent Toxicity Classification of Chemicals by OECD Project

| Rat IP LD50 Classification | Rat IV LD50 Classification | Rat Oral LD50 Classification | Rat SC LD50 Classification |
|----------------------------|----------------------------|------------------------------|----------------------------|
| Class 5 in AD              | Class 4 in AD              | Class 4 in AD                | Class 5 out of AD          |

IP - Intraperitoneal route of administration

IV - Intravenous route of administration

Oral - Oral route of administration

SC - Subcutaneous route of administration

in AD - compound falls in applicability domain of models

out of AD - compound is out of applicability domain of models

**Table S21. Rat acute toxicity of 3c predicted by GUSAR**

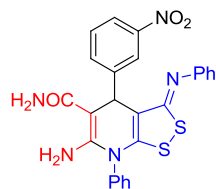

| Rat IP LD50 Log10(mmol/kg) | Rat IV LD50 log10(mmol/kg) | Rat Oral LD50 log10(mmol/kg) | Rat SC LD50 log10(mmol/kg) |
|----------------------------|----------------------------|------------------------------|----------------------------|
| 0,060 in AD                | -0,380 in AD               | 0,512 in AD                  | 0,179 out of AD            |

| Rat IP LD50 (mg/kg) | Rat IV LD50 (mg/kg) | Rat Oral LD50 (mg/kg) | Rat SC LD50 (mg/kg) |
|---------------------|---------------------|-----------------------|---------------------|
| 575,400 in AD       | 209,100 in AD       | 1630,000 in AD        | 756,600 out of AD   |

Acute Rodent Toxicity Classification of Chemicals by OECD Project

| Rat IP LD50 Classification | Rat IV LD50 Classification | Rat Oral LD50 Classification | Rat SC LD50 Classification |
|----------------------------|----------------------------|------------------------------|----------------------------|
| Class 5 in AD              | Class 4 in AD              | Class 4 in AD                | Class 4 out of AD          |

IP - Intraperitoneal route of administration

IV - Intravenous route of administration

Oral - Oral route of administration

SC - Subcutaneous route of administration

in AD - compound falls in applicability domain of models

out of AD - compound is out of applicability domain of models

**Table S22. Rat acute toxicity of 3d predicted by GUSAR**

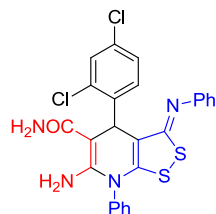

| Rat IP LD50 Log10(mmol/kg) | Rat IV LD50 log10(mmol/kg) | Rat Oral LD50 log10(mmol/kg) | Rat SC LD50 log10(mmol/kg) |
|----------------------------|----------------------------|------------------------------|----------------------------|
| 0,247 in AD                | -0,562 in AD               | 0,463 in AD                  | 0,541 out of AD            |

| Rat IP LD50 (mg/kg) | Rat IV LD50 (mg/kg) | Rat Oral LD50 (mg/kg) | Rat SC LD50 (mg/kg) |
|---------------------|---------------------|-----------------------|---------------------|
| 927,100 in AD       | 144,100 in AD       | 1524,000 in AD        | 1826,000 out of AD  |

Acute Rodent Toxicity Classification of Chemicals by OECD Project

| Rat IP LD50 Classification | Rat IV LD50 Classification | Rat Oral LD50 Classification | Rat SC LD50 Classification |
|----------------------------|----------------------------|------------------------------|----------------------------|
| Class 5 in AD              | Class 4 in AD              | Class 4 in AD                | Class 5 out of AD          |

**Table S23. Rat acute toxicity of 3e predicted by GUSAR**

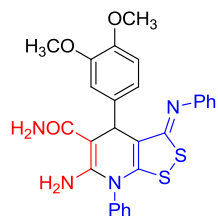

| Rat IP LD50 Log10(mmol/kg) | Rat IV LD50 log10(mmol/kg) | Rat Oral LD50 log10(mmol/kg) | Rat SC LD50 log10(mmol/kg) |
|----------------------------|----------------------------|------------------------------|----------------------------|
| 0,141 in AD                | -0,388 in AD               | 0,470 in AD                  | 0,422 in AD                |

| Rat IP LD50 (mg/kg) | Rat IV LD50 (mg/kg) | Rat Oral LD50 (mg/kg) | Rat SC LD50 (mg/kg) |
|---------------------|---------------------|-----------------------|---------------------|
| 715,500 in AD       | 211,500 in AD       | 1524,000 in AD        | 1366,000 in AD      |

### Acute Rodent Toxicity Classification of Chemicals by OECD Project

| Rat IP LD50 Classification | Rat IV LD50 Classification | Rat Oral LD50 Classification | Rat SC LD50 Classification |
|----------------------------|----------------------------|------------------------------|----------------------------|
| Class 5 in AD              | Class 4 in AD              | Class 4 in AD                | Class 5 in AD              |

IP - Intraperitoneal route of administration

IV - Intravenous route of administration

Oral - Oral route of administration

SC - Subcutaneous route of administration

in AD - compound falls in applicability domain of models

out of AD - compound is out of applicability domain of models

**Table S24. Rat acute toxicity of 3f predicted by GUSAR**

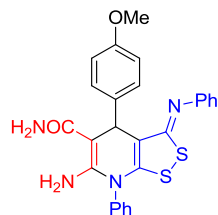

| Rat IP LD50 Log10(mmol/kg) | Rat IV LD50 log10(mmol/kg) | Rat Oral LD50 log10(mmol/kg) | Rat SC LD50 log10(mmol/kg) |
|----------------------------|----------------------------|------------------------------|----------------------------|
| 0,171 in AD                | -0,224 in AD               | 0,534 in AD                  | 0,403 out of AD            |

| Rat IP LD50 (mg/kg) | Rat IV LD50 (mg/kg) | Rat Oral LD50 (mg/kg) | Rat SC LD50 (mg/kg) |
|---------------------|---------------------|-----------------------|---------------------|
| 721,700 in AD       | 290,300 in AD       | 1662,000 in AD        | 1232,000 out of AD  |

### Acute Rodent Toxicity Classification of Chemicals by OECD Project

| Rat IP LD50 Classification | Rat IV LD50 Classification | Rat Oral LD50 Classification | Rat SC LD50 Classification |
|----------------------------|----------------------------|------------------------------|----------------------------|
| Class 5 in AD              | Class 4 in AD              | Class 4 in AD                | Class 5 out of AD          |

IP - Intraperitoneal route of administration

IV - Intravenous route of administration

Oral - Oral route of administration

SC - Subcutaneous route of administration

in AD - compound falls in applicability domain of models

out of AD - compound is out of applicability domain of models



**Table S25. The predicted results of protein-ligand interaction for compounds 3a-f**

| Compound                                                                                             | Rank | PDB ID       | UniProt ID             | Predock score | Scoring functions $\Delta G_{\text{bind}}$ , kcal/mol | Final dock score |
|------------------------------------------------------------------------------------------------------|------|--------------|------------------------|---------------|-------------------------------------------------------|------------------|
| 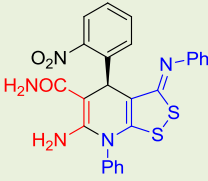<br><b>(R)-3a</b>   | 1    | 6uvc_A       | Q07817                 | 0.184         | -19.144                                               | 0.328            |
|                                                                                                      | 2    | 4r0i_A       | Q9Y5Y6                 | 0.156         | -21.667                                               | 0.319            |
|                                                                                                      | 3    | 3k9x_B       | P00742                 | 0.120         | -20.671                                               | 0.275            |
|                                                                                                      | 4    | 4yt6_H       | P08709                 | 0.122         | -19.541                                               | 0.268            |
|                                                                                                      | 5    | 4gu6_A       | Q05397                 | 0.084         | -24.434                                               | 0.267            |
|                                                                                                      | 6    | 1pkd_A       | P24941                 | 0.089         | -23.345                                               | 0.264            |
|                                                                                                      | 7    | 3znr_A       | Q8WUI4                 | 0.074         | -25.114                                               | 0.262            |
|                                                                                                      | 8    | Q7Z3E1_F1_d2 | Q7Z3E1                 | 0.068         | -25.585                                               | 0.260            |
|                                                                                                      | 9    | 2q7m_B,C     | P20292, P20292         | 0.059         | -26.706                                               | 0.259            |
|                                                                                                      | 10   | 4iph_A       | P27694                 | 0.131         | -17.007                                               | 0.259            |
|                                                                                                      | 11   | 3khv_A       | P00749                 | 0.098         | -21.235                                               | 0.257            |
|                                                                                                      | 12   | 7wld_S,T,U   | Q969N2, Q96S52, Q9H490 | 0.056         | -26.640                                               | 0.256            |
|                                                                                                      | 13   | 1trn_B       | P07477                 | 0.104         | -19.967                                               | 0.253            |
|                                                                                                      | 14   | 6r6y_A       | O43570                 | 0.083         | -22.730                                               | 0.253            |
|                                                                                                      | 15   | 2srt_A       | P08254                 | 0.070         | -24.351                                               | 0.252            |
|                                                                                                      | 16   | 7n9g_A,B     | P00519, P00519         | 0.057         | -25.985                                               | 0.252            |
|                                                                                                      | 17   | 3ac8_A       | P06239                 | 0.073         | -23.739                                               | 0.251            |
|                                                                                                      | 18   | 4mnf_B       | P15056                 | 0.065         | -24.744                                               | 0.251            |
|                                                                                                      | 19   | 1q6s_A,B     | P18031, P18031         | 0.068         | -24.287                                               | 0.250            |
|                                                                                                      | 20   | 8gv8_A       | P04920                 | 0.059         | -25.498                                               | 0.250            |
|                                                                                                      | 21   | 8bh3_A       | P78527                 | 0.057         | -25.727                                               | 0.250            |
|                                                                                                      | 22   | 7dtc_A       | Q14524                 | 0.060         | -25.171                                               | 0.249            |
|                                                                                                      | 23   | 1wbp_A       | Q96SB4                 | 0.066         | -24.075                                               | 0.246            |
|                                                                                                      | 24   | 7yaw_A       | Q9NYL2                 | 0.058         | -25.093                                               | 0.246            |
|                                                                                                      | 25   | 6kuw_A,B     | P18825, P18825         | 0.056         | -25.352                                               | 0.246            |
| <br><b>(S)-3a</b> | 1    | 6vwc_B       | Q07817                 | 0.170         | -21.386                                               | 0.330            |
|                                                                                                      | 2    | 2p93_A       | P00742                 | 0.133         | -22.615                                               | 0.303            |
|                                                                                                      | 3    | 4o97_A       | Q9Y5Y6                 | 0.137         | -20.649                                               | 0.292            |
|                                                                                                      | 4    | 4gu6_A       | Q05397                 | 0.091         | -25.831                                               | 0.284            |
|                                                                                                      | 5    | 1pkd_A       | P24941                 | 0.103         | -23.745                                               | 0.281            |
|                                                                                                      | 6    | 6r6y_A       | O43570                 | 0.102         | -23.378                                               | 0.277            |
|                                                                                                      | 7    | 3khv_A       | P00749                 | 0.108         | -22.081                                               | 0.273            |
|                                                                                                      | 8    | 4yt6_H       | P08709                 | 0.120         | -19.960                                               | 0.269            |
|                                                                                                      | 9    | 4fsl_E       | P56817                 | 0.098         | -22.323                                               | 0.266            |
|                                                                                                      | 10   | Q5JU69_F1_d1 | Q5JU69                 | 0.078         | -24.929                                               | 0.265            |
|                                                                                                      | 11   | 4mnf_B       | P15056                 | 0.078         | -24.719                                               | 0.263            |
|                                                                                                      | 12   | 2srt_A       | P08254                 | 0.072         | -25.422                                               | 0.263            |
|                                                                                                      | 13   | O15197_F1_d3 | O15197                 | 0.051         | -28.272                                               | 0.263            |
|                                                                                                      | 14   | 5qce_B       | P25774                 | 0.060         | -26.449                                               | 0.258            |
|                                                                                                      | 15   | 8evb_C       | Q16281                 | 0.082         | -23.328                                               | 0.257            |
|                                                                                                      | 16   | 2pqf_C       | Q9H0J9                 | 0.050         | -27.574                                               | 0.257            |
|                                                                                                      | 17   | 7yaw_A       | Q9NYL2                 | 0.070         | -24.727                                               | 0.255            |
|                                                                                                      | 18   | 1trn_B       | P07477                 | 0.104         | -20.179                                               | 0.255            |
|                                                                                                      | 19   | 7sxf_A       | P49840                 | 0.066         | -25.200                                               | 0.255            |
|                                                                                                      | 20   | 6glb_B       | P52333                 | 0.061         | -25.764                                               | 0.254            |
|                                                                                                      | 21   | 8hmy_E       | Q92989                 | 0.049         | -27.318                                               | 0.254            |
|                                                                                                      | 22   | 3cs9_B       | P00519                 | 0.099         | -20.578                                               | 0.254            |

|                                                                                                          |    |              |                        |       |         |       |
|----------------------------------------------------------------------------------------------------------|----|--------------|------------------------|-------|---------|-------|
|                                                                                                          | 23 | 6uel_B       | P31327                 | 0.056 | -26.201 | 0.253 |
|                                                                                                          | 24 | P29322_F1_d2 | P29322                 | 0.080 | -22.993 | 0.252 |
|                                                                                                          | 25 | 2q7m_A,B     | P20292, P20292         | 0.052 | -26.511 | 0.251 |
| 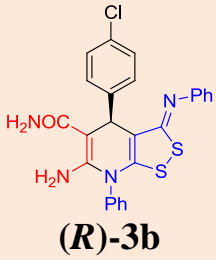 <p><b>(R)-3b</b></p>   | 1  | 5nka_A       | P29317                 | 0.140 | -22.971 | 0.312 |
|                                                                                                          | 2  | 3zln_A       | Q07817                 | 0.148 | -21.430 | 0.309 |
|                                                                                                          | 3  | 2xby_A       | P00742                 | 0.142 | -21.699 | 0.305 |
|                                                                                                          | 4  | 3kul_B       | P29322                 | 0.119 | -23.931 | 0.298 |
|                                                                                                          | 5  | 4trz_B       | P56817                 | 0.128 | -20.976 | 0.286 |
|                                                                                                          | 6  | 3ac8_A       | P06239                 | 0.104 | -23.744 | 0.282 |
|                                                                                                          | 7  | 4cwt_A       | P07900                 | 0.085 | -25.792 | 0.278 |
|                                                                                                          | 8  | 8evb_C       | Q16281                 | 0.099 | -23.676 | 0.277 |
|                                                                                                          | 9  | 7rhi_D       | P29973                 | 0.106 | -22.535 | 0.275 |
|                                                                                                          | 10 | P42681_F1_d1 | P42681                 | 0.092 | -23.921 | 0.271 |
|                                                                                                          | 11 | Q15131_F1_d1 | Q15131                 | 0.096 | -23.315 | 0.271 |
|                                                                                                          | 12 | 3fsk_A       | Q16539                 | 0.090 | -23.462 | 0.266 |
|                                                                                                          | 13 | 2py3_A       | P21802                 | 0.075 | -25.396 | 0.265 |
|                                                                                                          | 14 | 7yaw_C       | Q9NYL2                 | 0.084 | -23.539 | 0.260 |
|                                                                                                          | 15 | 4twp_A       | P00519                 | 0.104 | -20.786 | 0.260 |
|                                                                                                          | 16 | 2xir_A       | P35968                 | 0.108 | -20.154 | 0.259 |
|                                                                                                          | 17 | 3fxx_A       | P29320                 | 0.098 | -21.308 | 0.258 |
|                                                                                                          | 18 | 5ghv_A       | P43405                 | 0.089 | -22.479 | 0.257 |
|                                                                                                          | 19 | 5uul_A       | Q86Y07                 | 0.066 | -25.505 | 0.257 |
|                                                                                                          | 20 | 4mnf_A       | P15056                 | 0.099 | -21.072 | 0.257 |
|                                                                                                          | 21 | 7ull_A       | P14625                 | 0.070 | -24.721 | 0.256 |
|                                                                                                          | 22 | 6e2n_A,B     | Q99683, Q99683         | 0.092 | -21.812 | 0.256 |
|                                                                                                          | 23 | 7sqa_B,C     | P37231, Q9Y618         | 0.048 | -27.244 | 0.252 |
|                                                                                                          | 24 | P36894_F1_d2 | P36894                 | 0.070 | -24.195 | 0.252 |
|                                                                                                          | 25 | Q13882_F1_d1 | Q13882                 | 0.076 | -23.352 | 0.251 |
|  <p><b>(S)-3b</b></p> | 1  | 2xby_A       | P00742                 | 0.142 | -22.485 | 0.311 |
|                                                                                                          | 2  | 5nka_A       | P29317                 | 0.140 | -21.311 | 0.300 |
|                                                                                                          | 3  | 3zln_A       | Q07817                 | 0.148 | -19.808 | 0.297 |
|                                                                                                          | 4  | P42681_F1_d1 | P42681                 | 0.092 | -24.357 | 0.274 |
|                                                                                                          | 5  | 4trz_B       | P56817                 | 0.128 | -19.185 | 0.272 |
|                                                                                                          | 6  | 3kul_B       | P29322                 | 0.119 | -20.477 | 0.272 |
|                                                                                                          | 7  | 8evb_C       | Q16281                 | 0.099 | -22.969 | 0.271 |
|                                                                                                          | 8  | 2jif_A,B,D   | P45954, P45954, P45954 | 0.048 | -29.434 | 0.269 |
|                                                                                                          | 9  | 1egd_A,B,C   | P11310, P11310, P11310 | 0.051 | -28.654 | 0.266 |
|                                                                                                          | 10 | 7rhi_D       | P29973                 | 0.106 | -21.341 | 0.266 |
|                                                                                                          | 11 | Q15131_F1_d1 | Q15131                 | 0.096 | -22.511 | 0.265 |
|                                                                                                          | 12 | Q13882_F1_d1 | Q13882                 | 0.076 | -25.111 | 0.264 |
|                                                                                                          | 13 | 3ac8_A       | P06239                 | 0.104 | -21.315 | 0.264 |
|                                                                                                          | 14 | Q15569_F1_d1 | Q15569                 | 0.067 | -26.180 | 0.264 |
|                                                                                                          | 15 | 3zmm_B       | O60674                 | 0.099 | -21.819 | 0.262 |
|                                                                                                          | 16 | 7yaw_C       | Q9NYL2                 | 0.084 | -23.715 | 0.262 |
|                                                                                                          | 17 | 3fxx_A       | P29320                 | 0.098 | -21.838 | 0.262 |
|                                                                                                          | 18 | P30291_F1_d1 | P30291                 | 0.090 | -22.648 | 0.260 |
|                                                                                                          | 19 | 4cwt_A       | P07900                 | 0.085 | -23.118 | 0.258 |
|                                                                                                          | 20 | 8eyk_F       | P49327                 | 0.075 | -24.427 | 0.258 |
|                                                                                                          | 21 | 4mnf_A       | P15056                 | 0.099 | -20.983 | 0.256 |

|                                                                                                          |    |              |                        |       |         |       |
|----------------------------------------------------------------------------------------------------------|----|--------------|------------------------|-------|---------|-------|
|                                                                                                          | 22 | 2dq7_X       | P06241                 | 0.076 | -23.981 | 0.256 |
|                                                                                                          | 23 | 5uch_B       | P08238                 | 0.080 | -23.302 | 0.255 |
|                                                                                                          | 24 | 4wua_A       | Q96SB4                 | 0.070 | -24.568 | 0.254 |
|                                                                                                          | 25 | 5k3m_A       | P51449                 | 0.058 | -26.194 | 0.254 |
| 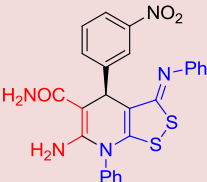 <p><b>(R)-3c</b></p>   | 1  | 6uvc_A       | Q07817                 | 0.184 | -20.078 | 0.335 |
|                                                                                                          | 2  | 4r0i_A       | Q9Y5Y6                 | 0.156 | -20.781 | 0.312 |
|                                                                                                          | 3  | 2q7m_B,C     | P20292, P20292         | 0.059 | -29.401 | 0.279 |
|                                                                                                          | 4  | 3k9x_B       | P00742                 | 0.120 | -20.368 | 0.273 |
|                                                                                                          | 5  | 1pkd_A       | P24941                 | 0.089 | -23.976 | 0.269 |
|                                                                                                          | 6  | 4gu6_A       | Q05397                 | 0.084 | -24.629 | 0.268 |
|                                                                                                          | 7  | Q7Z3E1_F1_d2 | Q7Z3E1                 | 0.068 | -26.708 | 0.268 |
|                                                                                                          | 8  | 4yt6_H       | P08709                 | 0.122 | -19.155 | 0.265 |
|                                                                                                          | 9  | 7wld_S,T,U   | Q969N2, Q96S52, Q9H490 | 0.056 | -27.683 | 0.264 |
|                                                                                                          | 10 | 2srt_A       | P08254                 | 0.070 | -25.062 | 0.258 |
|                                                                                                          | 11 | 4iph_A       | P27694                 | 0.131 | -16.618 | 0.256 |
|                                                                                                          | 12 | 3khv_A       | P00749                 | 0.098 | -21.003 | 0.255 |
|                                                                                                          | 13 | 3ac8_A       | P06239                 | 0.073 | -23.956 | 0.253 |
|                                                                                                          | 14 | 6r6y_A       | O43570                 | 0.083 | -22.614 | 0.252 |
|                                                                                                          | 15 | 1trn_B       | P07477                 | 0.104 | -19.671 | 0.251 |
|                                                                                                          | 16 | 5mkf_C,D     | Q13563, Q13563         | 0.057 | -25.634 | 0.249 |
|                                                                                                          | 17 | 1wbp_A       | Q96SB4                 | 0.066 | -24.279 | 0.248 |
|                                                                                                          | 18 | 8gv8_A       | P04920                 | 0.059 | -25.023 | 0.247 |
|                                                                                                          | 19 | 7yaw_A       | Q9NYL2                 | 0.058 | -25.019 | 0.246 |
|                                                                                                          | 20 | 1rd4_C,D     | P20701, P20701         | 0.058 | -24.976 | 0.245 |
|                                                                                                          | 21 | 7n9g_A,B     | P00519, P00519         | 0.057 | -24.919 | 0.244 |
|                                                                                                          | 22 | 4lxd_A       | P10415                 | 0.098 | -19.465 | 0.244 |
|                                                                                                          | 23 | 4mnf_B       | P15056                 | 0.065 | -23.720 | 0.243 |
|                                                                                                          | 24 | Q5JU69_F1_d1 | Q5JU69                 | 0.060 | -24.331 | 0.242 |
|                                                                                                          | 25 | 8gfa_D       | Q8NER1                 | 0.065 | -23.568 | 0.242 |
|  <p><b>(S)-3c</b></p> | 1  | 6vwc_B       | Q07817                 | 0.170 | -21.037 | 0.328 |
|                                                                                                          | 2  | 2p93_A       | P00742                 | 0.133 | -22.404 | 0.301 |
|                                                                                                          | 3  | 4o97_A       | Q9Y5Y6                 | 0.137 | -20.932 | 0.294 |
|                                                                                                          | 4  | 1pkd_A       | P24941                 | 0.103 | -24.200 | 0.285 |
|                                                                                                          | 5  | 4gu6_A       | Q05397                 | 0.091 | -24.445 | 0.274 |
|                                                                                                          | 6  | 4yt6_H       | P08709                 | 0.120 | -20.337 | 0.272 |
|                                                                                                          | 7  | 3khv_A       | P00749                 | 0.108 | -21.122 | 0.266 |
|                                                                                                          | 8  | 4tqb_A       | P06730                 | 0.096 | -22.604 | 0.266 |
|                                                                                                          | 9  | O15197_F1_d3 | O15197                 | 0.051 | -28.647 | 0.266 |
|                                                                                                          | 10 | 4fsl_E       | P56817                 | 0.098 | -22.015 | 0.263 |
|                                                                                                          | 11 | 2pqf_C       | Q9H0J9                 | 0.050 | -27.859 | 0.259 |
|                                                                                                          | 12 | 6r6y_A       | O43570                 | 0.102 | -20.992 | 0.259 |
|                                                                                                          | 13 | 1trn_B       | P07477                 | 0.104 | -20.447 | 0.257 |
|                                                                                                          | 14 | 8hmy_E       | Q92989                 | 0.049 | -27.748 | 0.257 |
|                                                                                                          | 15 | 8evb_C       | Q16281                 | 0.082 | -23.218 | 0.256 |
|                                                                                                          | 16 | P29322_F1_d2 | P29322                 | 0.080 | -23.175 | 0.254 |
|                                                                                                          | 17 | Q9UKR0_F1_d1 | Q9UKR0                 | 0.078 | -23.281 | 0.252 |
|                                                                                                          | 18 | Q5JU69_F1_d1 | Q5JU69                 | 0.078 | -23.168 | 0.251 |
|                                                                                                          | 19 | 7wqw_B       | P98073                 | 0.072 | -23.876 | 0.251 |
|                                                                                                          | 20 | P42681_F1_d1 | P42681                 | 0.066 | -24.468 | 0.250 |
|                                                                                                          | 21 | 4lxd_A       | P10415                 | 0.090 | -21.268 | 0.249 |

|                                                                                                          |    |                |                                 |       |         |       |
|----------------------------------------------------------------------------------------------------------|----|----------------|---------------------------------|-------|---------|-------|
|                                                                                                          | 22 | 6qff_A         | Q92876                          | 0.070 | -23.846 | 0.249 |
|                                                                                                          | 23 | 7oam_B         | Q12866                          | 0.061 | -24.987 | 0.248 |
|                                                                                                          | 24 | 4i6b_A         | Q9NYY3                          | 0.055 | -25.779 | 0.248 |
|                                                                                                          | 25 | 8eob_A         | P08238                          | 0.063 | -24.691 | 0.248 |
| 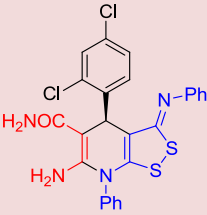 <p><b>(R)-3d</b></p>   | 1  | 5nka_A         | P29317                          | 0.123 | -24.021 | 0.303 |
|                                                                                                          | 2  | 3kul_B         | P29322                          | 0.105 | -24.202 | 0.286 |
|                                                                                                          | 3  | 6uvc_A         | Q07817                          | 0.126 | -20.699 | 0.281 |
|                                                                                                          | 4  | 1xkb_C         | P00742                          | 0.110 | -21.491 | 0.271 |
|                                                                                                          | 5  | 2py3_A         | P21802                          | 0.065 | -26.616 | 0.264 |
|                                                                                                          | 6  | 5lay_E         | Q00987                          | 0.103 | -21.325 | 0.263 |
|                                                                                                          | 7  | 7rhh_D         | P29973                          | 0.091 | -22.872 | 0.262 |
|                                                                                                          | 8  | 3bys_A         | P06239                          | 0.091 | -22.813 | 0.262 |
|                                                                                                          | 9  | 5tq4_A         | O60674                          | 0.081 | -24.094 | 0.261 |
|                                                                                                          | 10 | 8eu3_B         | Q16281                          | 0.088 | -22.619 | 0.258 |
|                                                                                                          | 11 | 2dq7_X         | P06241                          | 0.071 | -24.680 | 0.256 |
|                                                                                                          | 12 | P42681_F1_d1   | P42681                          | 0.074 | -24.271 | 0.256 |
|                                                                                                          | 13 | P29320_F1_d2   | P29320                          | 0.084 | -22.739 | 0.255 |
|                                                                                                          | 14 | 4fsl_E         | P56817                          | 0.095 | -21.070 | 0.253 |
|                                                                                                          | 15 | 2xir_A         | P35968                          | 0.088 | -22.013 | 0.253 |
|                                                                                                          | 16 | 8eob_A         | P08238                          | 0.058 | -25.707 | 0.251 |
|                                                                                                          | 17 | 4nfn_A         | Q5TCY1                          | 0.071 | -23.964 | 0.250 |
|                                                                                                          | 18 | 2wma_C         | P24941                          | 0.067 | -24.421 | 0.250 |
|                                                                                                          | 19 | 4iph_A         | P27694                          | 0.118 | -17.520 | 0.250 |
|                                                                                                          | 20 | 6e2n_A,B       | Q99683, Q99683                  | 0.072 | -23.624 | 0.249 |
|                                                                                                          | 21 | 7yaw_C         | Q9NYL2                          | 0.071 | -23.697 | 0.249 |
|                                                                                                          | 22 | 7k0v_C         | P15056                          | 0.077 | -22.763 | 0.248 |
|                                                                                                          | 23 | Q9UF33_F1_d1   | Q9UF33                          | 0.067 | -24.087 | 0.248 |
|                                                                                                          | 24 | 4mxo_B         | P12931                          | 0.063 | -24.520 | 0.247 |
|                                                                                                          | 25 | Q15131_F1_d1   | Q15131                          | 0.068 | -23.840 | 0.247 |
|  <p><b>(S)-3d</b></p> | 1  | 5lay_E         | Q00987                          | 0.118 | -23.576 | 0.295 |
|                                                                                                          | 2  | 6uvc_A         | Q07817                          | 0.135 | -20.769 | 0.291 |
|                                                                                                          | 3  | 4iph_A         | P27694                          | 0.144 | -16.883 | 0.271 |
|                                                                                                          | 4  | 7k0v_C         | P15056                          | 0.065 | -26.637 | 0.265 |
|                                                                                                          | 5  | 3cen_A         | P00742                          | 0.091 | -22.105 | 0.257 |
|                                                                                                          | 6  | 7dsx_A,B       | P19634, P19634                  | 0.061 | -26.129 | 0.257 |
|                                                                                                          | 7  | 5nka_A         | P29317                          | 0.083 | -22.798 | 0.254 |
|                                                                                                          | 8  | P11511_F1_d1   | P11511                          | 0.066 | -24.842 | 0.253 |
|                                                                                                          | 9  | Q99988_F1_d1   | Q99988                          | 0.060 | -25.462 | 0.251 |
|                                                                                                          | 10 | 7rhh_D         | P29973                          | 0.069 | -24.080 | 0.250 |
|                                                                                                          | 11 | 4fsl_E         | P56817                          | 0.084 | -21.800 | 0.248 |
|                                                                                                          | 12 | 1yze_C         | Q93009                          | 0.068 | -23.881 | 0.247 |
|                                                                                                          | 13 | 1gzq_A         | P29016                          | 0.066 | -24.006 | 0.246 |
|                                                                                                          | 14 | 8eu3_B         | Q16281                          | 0.075 | -22.673 | 0.245 |
|                                                                                                          | 15 | Q8IZD2_F1_d1   | Q8IZD2                          | 0.060 | -24.585 | 0.244 |
|                                                                                                          | 16 | 7d4p_C,D       | Q9UL62, Q9UL62                  | 0.068 | -23.371 | 0.244 |
|                                                                                                          | 17 | 4wa9_A         | P00519                          | 0.067 | -23.486 | 0.243 |
|                                                                                                          | 18 | 3zns_A         | Q8WUI4                          | 0.075 | -22.341 | 0.243 |
|                                                                                                          | 19 | 5ek0_B,C       | Q15858, Q15858                  | 0.069 | -22.991 | 0.242 |
|                                                                                                          | 20 | 2fxf_A         | P21673                          | 0.065 | -23.491 | 0.241 |
|                                                                                                          | 21 | 5z62_A,B,C,H,N | O00483, P00395, P00403, P00414, | 0.062 | -23.906 | 0.241 |

|                                                                                                          |    |              |                |       |         |       |
|----------------------------------------------------------------------------------------------------------|----|--------------|----------------|-------|---------|-------|
|                                                                                                          |    |              | P14854         |       |         |       |
|                                                                                                          | 22 | 3vo3_A       | P35968         | 0.079 | -21.537 | 0.240 |
|                                                                                                          | 23 | 7tj9_A       | Q01118         | 0.069 | -22.788 | 0.240 |
|                                                                                                          | 24 | 6m5e_B       | P02768         | 0.061 | -23.901 | 0.240 |
|                                                                                                          | 25 | 4guk_B       | P62166         | 0.075 | -21.964 | 0.240 |
| 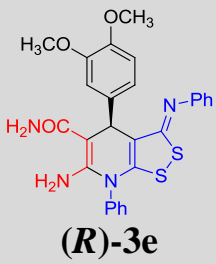 <p><b>(R)-3e</b></p>   | 1  | 2xby_A       | P00742         | 0.238 | -22.361 | 0.406 |
|                                                                                                          | 2  | 3zlr_B       | Q07817         | 0.221 | -24.133 | 0.402 |
|                                                                                                          | 3  | 4jzf_H       | P08709         | 0.158 | -21.061 | 0.316 |
|                                                                                                          | 4  | 4r0i_A       | Q9Y5Y6         | 0.161 | -20.344 | 0.314 |
|                                                                                                          | 5  | 3khv_A       | P00749         | 0.143 | -21.602 | 0.305 |
|                                                                                                          | 6  | 1trn_A       | P07477         | 0.137 | -21.295 | 0.296 |
|                                                                                                          | 7  | 1bhx_B,F     | P00734, P00734 | 0.113 | -24.375 | 0.295 |
|                                                                                                          | 8  | 3ac8_A       | P06239         | 0.109 | -23.601 | 0.286 |
|                                                                                                          | 9  | 5to3_B       | P07204         | 0.122 | -21.287 | 0.282 |
|                                                                                                          | 10 | 3lc3_C       | P00740         | 0.123 | -21.083 | 0.281 |
|                                                                                                          | 11 | 3vnh_A       | Q14145         | 0.151 | -16.614 | 0.275 |
|                                                                                                          | 12 | 1b3d_B       | P08254         | 0.099 | -23.438 | 0.275 |
|                                                                                                          | 13 | 8bio_A       | P29317         | 0.095 | -23.881 | 0.274 |
|                                                                                                          | 14 | 3gov_B       | P48740         | 0.123 | -19.882 | 0.273 |
|                                                                                                          | 15 | Q9NZQ0_F1_d1 | Q9NZQ0         | 0.117 | -20.536 | 0.271 |
|                                                                                                          | 16 | Q9Y227_F1_d1 | Q9Y227         | 0.109 | -21.664 | 0.271 |
|                                                                                                          | 17 | P29322_F1_d2 | P29322         | 0.090 | -24.171 | 0.271 |
|                                                                                                          | 18 | 7rhg_A       | P29973         | 0.091 | -23.934 | 0.270 |
|                                                                                                          | 19 | 8evb_C       | Q16281         | 0.096 | -23.240 | 0.270 |
|                                                                                                          | 20 | 6o1s_E       | P03952         | 0.123 | -19.545 | 0.270 |
|                                                                                                          | 21 | Q6ZWK6_F1_d2 | Q6ZWK6         | 0.114 | -20.807 | 0.270 |
|                                                                                                          | 22 | 6r6y_A       | O43570         | 0.094 | -23.276 | 0.268 |
|                                                                                                          | 23 | P42681_F1_d1 | P42681         | 0.078 | -25.370 | 0.268 |
|                                                                                                          | 24 | 2xk7_A       | P51955         | 0.095 | -22.682 | 0.265 |
|                                                                                                          | 25 | Q9BQR3_F1_d1 | Q9BQR3         | 0.107 | -21.020 | 0.265 |
|  <p><b>(S)-3e</b></p> | 1  | 2xby_A       | P00742         | 0.238 | -22.022 | 0.404 |
|                                                                                                          | 2  | 3zlr_B       | Q07817         | 0.221 | -21.606 | 0.383 |
|                                                                                                          | 3  | 3khv_A       | P00749         | 0.143 | -24.090 | 0.324 |
|                                                                                                          | 4  | 4jzf_H       | P08709         | 0.158 | -21.160 | 0.317 |
|                                                                                                          | 5  | 4r0i_A       | Q9Y5Y6         | 0.161 | -20.511 | 0.315 |
|                                                                                                          | 6  | 3qtv_H       | P00734         | 0.135 | -22.203 | 0.302 |
|                                                                                                          | 7  | 1trn_A       | P07477         | 0.137 | -21.415 | 0.297 |
|                                                                                                          | 8  | 3lc3_C       | P00740         | 0.123 | -22.795 | 0.294 |
|                                                                                                          | 9  | 1zsk_A       | P03951         | 0.105 | -23.921 | 0.285 |
|                                                                                                          | 10 | 3vnh_A       | Q14145         | 0.151 | -17.788 | 0.284 |
|                                                                                                          | 11 | 3gov_B       | P48740         | 0.123 | -21.110 | 0.282 |
|                                                                                                          | 12 | 8evb_C       | Q16281         | 0.096 | -24.168 | 0.277 |
|                                                                                                          | 13 | Q9BQR3_F1_d1 | Q9BQR3         | 0.107 | -22.571 | 0.277 |
|                                                                                                          | 14 | 7yaw_C       | Q9NYL2         | 0.088 | -25.157 | 0.277 |
|                                                                                                          | 15 | 5to3_B       | P07204         | 0.122 | -20.561 | 0.276 |
|                                                                                                          | 16 | Q6ZMR5_F1_d2 | Q6ZMR5         | 0.110 | -21.928 | 0.274 |
|                                                                                                          | 17 | 6o1s_E       | P03952         | 0.123 | -20.045 | 0.274 |
|                                                                                                          | 18 | 1t31_A       | P23946         | 0.105 | -22.335 | 0.273 |
|                                                                                                          | 19 | Q9Y227_F1_d1 | Q9Y227         | 0.109 | -21.803 | 0.272 |
|                                                                                                          | 20 | Q6ZWK6_F1_d2 | Q6ZWK6         | 0.114 | -20.579 | 0.268 |
|                                                                                                          | 21 | Q15569_F1_d1 | Q15569         | 0.074 | -25.779 | 0.267 |

|                                                                                                          |    |              |        |       |         |       |
|----------------------------------------------------------------------------------------------------------|----|--------------|--------|-------|---------|-------|
|                                                                                                          | 22 | 4j5q_A       | Q9Y530 | 0.074 | -25.689 | 0.267 |
|                                                                                                          | 23 | 1rd4_A       | P20701 | 0.095 | -22.768 | 0.266 |
|                                                                                                          | 24 | 1b3d_B       | P08254 | 0.099 | -22.116 | 0.265 |
|                                                                                                          | 25 | P29322_F1_d2 | P29322 | 0.090 | -23.195 | 0.264 |
| 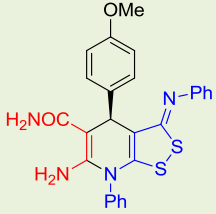 <p><b>(R)-3f</b></p>   | 1  | 3zln_A       | Q07817 | 0.195 | -21.226 | 0.354 |
|                                                                                                          | 2  | 7ahu_E       | P00742 | 0.168 | -18.088 | 0.304 |
|                                                                                                          | 3  | 3ac8_A       | P06239 | 0.114 | -23.744 | 0.293 |
|                                                                                                          | 4  | 2g2h_A       | P00519 | 0.125 | -21.258 | 0.284 |
|                                                                                                          | 5  | 5za9_U       | P00749 | 0.119 | -21.856 | 0.283 |
|                                                                                                          | 6  | 4gu6_A       | Q05397 | 0.104 | -23.786 | 0.282 |
|                                                                                                          | 7  | 4mnf_B       | P15056 | 0.106 | -23.415 | 0.281 |
|                                                                                                          | 8  | P29322_F1_d2 | P29322 | 0.102 | -23.666 | 0.279 |
|                                                                                                          | 9  | 8eob_A       | P08238 | 0.080 | -25.810 | 0.273 |
|                                                                                                          | 10 | P42681_F1_d1 | P42681 | 0.090 | -24.442 | 0.273 |
|                                                                                                          | 11 | 5nk5_A       | P29317 | 0.106 | -22.317 | 0.273 |
|                                                                                                          | 12 | 4yt6_H       | P08709 | 0.131 | -18.778 | 0.272 |
|                                                                                                          | 13 | 1trn_A       | P07477 | 0.116 | -20.504 | 0.270 |
|                                                                                                          | 14 | Q15131_F1_d1 | Q15131 | 0.092 | -23.440 | 0.268 |
|                                                                                                          | 15 | 4fst_A       | O14757 | 0.095 | -22.766 | 0.266 |
|                                                                                                          | 16 | 1hxe_H       | P00734 | 0.092 | -23.127 | 0.265 |
|                                                                                                          | 17 | 8evc_C       | Q16281 | 0.094 | -22.744 | 0.264 |
|                                                                                                          | 18 | 7z5x_B       | P08922 | 0.097 | -22.112 | 0.263 |
|                                                                                                          | 19 | 3znr_A       | Q8WUI4 | 0.087 | -23.532 | 0.263 |
|                                                                                                          | 20 | Q15569_F1_d1 | Q15569 | 0.080 | -24.303 | 0.262 |
|                                                                                                          | 21 | 4r0i_A       | Q9Y5Y6 | 0.104 | -21.063 | 0.262 |
|                                                                                                          | 22 | 1wbv_A       | Q16539 | 0.100 | -21.545 | 0.261 |
|                                                                                                          | 23 | 2pzp_A       | P21802 | 0.067 | -25.837 | 0.261 |
|                                                                                                          | 24 | 4nh9_A       | P14625 | 0.091 | -22.671 | 0.261 |
|                                                                                                          | 25 | 1xbb_A       | P43405 | 0.087 | -22.836 | 0.258 |
|  <p><b>(S)-3f</b></p> | 1  | 3zln_A       | Q07817 | 0.195 | -20.578 | 0.349 |
|                                                                                                          | 2  | 7ahu_E       | P00742 | 0.168 | -19.986 | 0.318 |
|                                                                                                          | 3  | 4gu6_A       | Q05397 | 0.104 | -25.151 | 0.292 |
|                                                                                                          | 4  | 4yt6_H       | P08709 | 0.131 | -21.267 | 0.291 |
|                                                                                                          | 5  | 5za9_U       | P00749 | 0.119 | -21.811 | 0.283 |
|                                                                                                          | 6  | P29322_F1_d2 | P29322 | 0.102 | -23.814 | 0.280 |
|                                                                                                          | 7  | P42681_F1_d1 | P42681 | 0.090 | -25.047 | 0.278 |
|                                                                                                          | 8  | 8eob_A       | P08238 | 0.080 | -26.222 | 0.277 |
|                                                                                                          | 9  | 3ac8_A       | P06239 | 0.114 | -21.467 | 0.275 |
|                                                                                                          | 10 | 2g2h_A       | P00519 | 0.125 | -19.971 | 0.275 |
|                                                                                                          | 11 | Q15569_F1_d1 | Q15569 | 0.080 | -25.907 | 0.274 |
|                                                                                                          | 12 | 8evc_C       | Q16281 | 0.094 | -23.821 | 0.272 |
|                                                                                                          | 13 | 3gov_B       | P48740 | 0.104 | -22.394 | 0.272 |
|                                                                                                          | 14 | 3znr_A       | Q8WUI4 | 0.087 | -24.622 | 0.271 |
|                                                                                                          | 15 | 7yaw_C       | Q9NYL2 | 0.088 | -24.029 | 0.268 |
|                                                                                                          | 16 | 6o1s_E       | P03952 | 0.110 | -20.993 | 0.267 |
|                                                                                                          | 17 | Q13882_F1_d1 | Q13882 | 0.074 | -25.621 | 0.266 |
|                                                                                                          | 18 | 5nk5_A       | P29317 | 0.106 | -21.262 | 0.265 |
|                                                                                                          | 19 | 1wbv_A       | Q16539 | 0.100 | -22.032 | 0.265 |
|                                                                                                          | 20 | 6fad_D       | Q96SB4 | 0.078 | -24.796 | 0.264 |
|                                                                                                          | 21 | 6sgk_A       | P51955 | 0.096 | -22.459 | 0.264 |
|                                                                                                          | 22 | 4nfn_A       | Q5TCY1 | 0.090 | -23.156 | 0.264 |

|  |    |        |        |       |         |       |
|--|----|--------|--------|-------|---------|-------|
|  | 23 | 4g2f_A | P29320 | 0.099 | -21.959 | 0.263 |
|  | 24 | ltrn_A | P07477 | 0.116 | -19.653 | 0.263 |
|  | 25 | 4lxd_A | P10415 | 0.096 | -22.233 | 0.263 |
